# Supplementary material
Source: publisher figshare collection journal article supplement (https://tandf.figshare.com/ndownloader/files/22903778)
Supplement: Supplementary file 1 [file 22903778]

**SUPPORTING INFORMATION**

*For*

**A ligand free approach to substituted (Z)-3-methyleneisoindolin-1-ones via Cu (I) catalyzed regio - and stereo selective assembly of 2-iodobenzamide and terminal alkyne**

**Rimpa De, Mrinal K. Bera***

Department of Chemistry, Indian Institute of Engineering Science and Technology (IIEST), Shibpur

PO- Botanic Garden, Howrah- 711 103 (WB), India

[*mrinalkbera26@gmail.com*](mailto:mrinalkbera26@gmail.com)

**TABLE OF CONTENT**

**Genaral consideration**

**Characterisation data**

**1H and 13C NMR spectra of sample 3a to 3x respectively**

**Crystal data of 3a**

**General consideration**

All the chemicals including CuI and all substituted acetylene compounds were purchased from Sigma Aldrich. Potassium carbonate was purchased from Spectrochem, India. Thin layer chromatography was done by precoated silica gel on glass plate. All the 1H and 13C NMR spectra were recorded at 400MHz and 100MHz, 150MHz. Chemical shifts value are given in δ (parts per million) related to CDCl3 [ 1H NMR(7.26 ppm) and 13C NMR(77.26 ppm) ]. Coupling constant (J) and spin multiplicity are given in Hz and singlet (s), doublet (d), triplet (t), quartet (q), multiplate (m). All commercially available solvents were used after distillation for purity. Inert atmosphere created by nitrogen gas. All the glassware was oven-dried. All the HRMS spectra recorded in Q-TOF mass spectrometer.

**Characterisation data**

**(Z)-3-Benzylidene 2-phenyl isoindolin -1-one (3a)**

Yield: 85%, white solid.

1HNMR(400MHz,CDCl3):δ= 7.95(d,7.6Hz,1H), 7.87(d,7.6Hz,1H), 7.68(t,7.2 Hz,1H), 7.55(t,7.4 Hz,1H), 7.08(brs,5H), 6.97-6.90(m,3H), 6.8(brs, 1H), 6.84(d,3.2Hz,2H).

13CNMR(150MHz,CDCl3):δ=167.89,138.89,136.10,134.58,133.79,132.67,129.44,129.33,128.40,128.04,127.45,126.95,126.80,124.13,119.61,107.87.

HRMS: m/z [M+H]+calcd for C21H15NO:298.1234; found: 298.1207.

**(Z)-3-benzylidene-2-(4-bromophenyl) isoindolin-1-one (3b)**

Yield: 80%, white solid

1HNMR(400MHz,CDCl3):δ=7.94(d,7.6Hz,1H),7.86(d,7.6Hz,1H),7.68(t,7.4Hz,1H),7.56(t,7.4Hz,1H),7.19(d,8.4Hz,2H),7.05(d,6.8Hz,1H),6.95(m,4H),6.86(d,7.6Hz,3H)

13CNMR(150MHz,CDCl3):δ=167.97,138.71,135.10,134.32,133.54,132.89,131.43,129.58,129.35,128.90, 127.77, 127.14, 124.19, 120.56, 119.67, 108.04.

HRMS:m/z[M+H]+calcdforC21H14BrNO:376.0339;found:376.0304,378.0270.

**(Z)-3-benzylidene-2-(4-chlorophenyl) isoindolin-1-one (3c)**

Yield: 85%, light yellow solid.

1HNMR(400MHz,CDCl3):δ=7.94(d,7.2Hz,1H),7.86(d,7.6Hz,1H),7.68(m,1H),7.56(t,7.4Hz,1H),7.04(m,3H),6.98(m,4H),6.86(d,8.4Hz,3H).

13CNMR(150MHz,CDCl3):δ=168.05,138.71,134.60,134.39,133.56,132.88,132.59,129.58,129.37,128.56,128.47,127.78,127.61,127.14,124.19,119.67,108.01.

HRMS: m/z [M+H]+calcd for C21H14ClNO:332.0844 ; found:332.0843.

**(Z)-3-benzylidene-2-(m-tolyl) isoindolin-1-one (3d)**

Yield: 95%, white solid.

1HNMR(400MHz,CDCl3):δ=7.95(d,7.6Hz,1H),7.85(d,7.6Hz,1H),7.67(t,7.4Hz,1H),7.55(t,7.4Hz,1H),7.01(t,7.8Hz,1H), 6.97-6.90(m,4H),6.86(d,7.2Hz,3H),6.82(s,1H),6.79(brs,1H),2.07(s,3H).

13CNMR(150MHz,CDCl3):δ=168.17,138.77,138.27,135.73,134.62,133.92,132.58,129.38,129.06,128.28,128.23,128.05,127.68,127.30,126.77,124.57,124.05,119.56,107.82,

21.16.

HRMS: m/z [M+H]+calcd for C22H17NO:312.139;found:312.1353.

**(Z)-2-(4-bromophenyl)-3-(4-methylbenzyliden) isoindolin-1-one (3e)**

Yield: 88%, light yellow solid.

1HNMR(400MHz,CDCl3):δ=7.93(dd,7.2Hz,3.4Hz,1H),7.84(dd,7.6Hz,3.8Hz,1H),7.67(dt,8Hz,3.2Hz,1H),7.54(dt,8Hz,3.8Hz,1H),7.25(d,1.6Hz,3H),7.20(m,2H),6.93(m,2H),6.82(d,4Hz,1H),6.80(m,2H),6.73(m,2H),2.25(s,3H).

13CNMR(150MHz,CDCl3):δ=167.99,138.81,137.31,135.18,133.87,132.83,131.39,130.57,129.42,129.27,128.92,128.33,127.72

HRMS: m/z [M+H]+calcd for C22H16BrNO: 390.0495; found: 390.0463,392.0408.

**(Z)-2-(4-chlorophenyl)-3-(4-methylbenzylidene) isoindolin-1-one (3f)**

Yield: 92%, light yellow solid.

1H NMR (400MHz,CDCl3): δ= 7.86(d,7.6Hz,1H),7.77(d,7.6 Hz,1H),7.60(t,7.6 Hz,1H),7.47(t,7.2Hz,1H),6.98(d,8.4Hz,1H),6.92(d,8.8Hz,2H),6.75(s,1H),6.71(d,8.0 Hz,2H),6.67(d,8.0 Hz,2H),2.17(s,3H).

13CNMR(150MHz,CDCl3):δ=168.07,138.83,137.28,134.70,133.90,132.82,132.53,130.59,129.41,129.31,128.56,128.43,128.32,127.73,124.17,119.60,108.29,21.38.

HRMS: m/z [M+H]+calcd for C22H16ClNO: 346.10 ; found: 346.1001.

**(Z)-3-(4-methylbenzylidene)-2-(m-tolyl) isoindolin-1-one (3g)**

Yield: 92%, white solid.

1HNMR(400MHz,CDCl3):δ=7.94(d,7.2Hz,1H),7.84(d,8.0Hz,1H),7.66(t,7.4Hz,1H),7.53(t,7.4Hz,1H),7.03(t,7.6Hz,1H),6.97(d,7.6Hz,1H),6.80(s,1H),6.78(brs,1H),6.73(brs,4H),2.19(s,3H),2.08(s,3H).

13CNMR(150MHz,CDCl3):δ=168.16,138.89,138.19,136.64,135.84,134.06,132.51,130.94129.20,129.02,128.27,128.23,128.00,127.53,124.57,124.03,119.49,108.08,21.34,21.16.HRMS: m/z [M+H]+calcd for C23H19NO:326.1547; found: 326.1543.

**(Z)-3-(4-methylbenzylidene)-2-phenylisoindolin-1-one (3h)**

Yield: 80%, white solid.

1HNMR(400MHz,CDCl3):δ=7.88(d,7.6Hz,1H),7.78(d,7.6Hz,1H),7.60(t,7.2Hz,1H),7.47(t,7.6Hz,1H),7.02(m,5H),6.74(s,1H),6.66.(m,4H),2.12(s,3H).

13CNMR(100MHz,CDCl3):δ=168.24,139.04,136.76,136.25,133.98,132.60,130.81,129.31,129.24,128.39,128.17,127.96,127.44,126.81,124.10,

119.53,108.19, 21.37.

HRMS: m/z [M+H]+calcd for C22H17NO: 312.1310; found: 312.8719

**(Z)-3-(4-tert-butyl)benzylidene)2-phenylisoindolin-1-one (3i)**

Yield: 87%, light yellowish white.

1H NMR (400MHz,CDCl3):δ=7.88(d,7.6Hz,1H), 7.79(d,7.6Hz,1H) , 7.60(t,7.4Hz,1H), 7.47(t,7.4Hz,1H), 6.97(m,5H), 6.84(d,8.4Hz,2H) ,6.77(s,1H), 6.68(d,8.0Hz,2H), 1.13(s,9H).

13CNMR (150MHz, CDCl3): δ=168.32, 150.01, 138.88, 132.58, 129.28, 128.89, 128.25, 127.54, 126.76, 124.32, 124.08, 119.56, 108.01, 34.59, 31.40.

HRMS: m/z [M+H]+ calcd for C25H23NO: 354.186; found: 354.1812.

**(Z)-3-(4-pentylbenzyllidene)-2-phenylisoindolin-1-one (3j)**

Yield: 87%, light yellowish solid.

1HNMR(400MHz,CDCl3):δ=7.97(d,7.6Hz,1H),7.87(d,8.0Hz,1H),7.69(t,7.4Hz,1H),7.56(t,7.2Hz,1H),7.06(m,5H),6.85(s,1H),6.75(q,8.0Hz,4H),2.45(t,7.4Hz,2H),1.50(p,7.6Hz,2H),1.33(p,7.2Hz,2H),1.23(m,62H),0.92(t,7.2 Hz,3H).

13CNMR(150MHz,CDCl3):δ=168.19,141.82,138.92,136.14,134.03,132.59,131.01,129.24,129.18,128.33,127.95,127.56,127.44,126.81,124.08,119.53,108.19,35.71,31.39,31.31,22.79,14.32.

HRMS: m/z [M+H]+ calcd for C26H25NO: 368.1936;found:368.1984

**(Z)-3-(4-butylbenzylidene)-2-(m-tolyl) isoindolin-1-one (3k)**

Yield: 87%, light yellow solid.

1HNMR(400MHz,CDCl3):δ=7.94(d,7.6Hz,1H),7.84(d,7.6Hz,1H),7.66(t,7.4Hz,1H),7.54(t,7.4Hz,1H),7.00(m,2H),6.84-6.81(m,2H),6.77-6.71(m,5H),2.44(t,7.4Hz,2H),2.07(s,3H),1.49

1.43(m,2H),1.29-1.24(m,2H),0.92(t,7.4Hz,3H).

13CNMR(150MHz,CDCl3):δ=168.19,141.69,138.84,138.14,135.82,134.19,132.52,131.19,129.22,128.99,128.29,128.19,128.02,127.56,127.44,124.62,124.02,119.50,108.15,35.45,33.78,22.29,21.19,14.19.

HRMS: m/z [M+H]+ calcd for C26H25NO: 368.2016; found:368.1976

**(Z)-3-4-(4-butylbenzylidene)-2-(4-chlorophenyl) isoindolin-1-one (3l)**

Yield: 88%, white solid.

1HNMR(400MHz,CDCl3):δ=7.94(d,7.6Hz,1H),7.85(d,8Hz,1H),7.68(t,7.2Hz,1H),7.55(t,7.4Hz,1H),7.01(m,4H),6.85(s,1H),6.77(m,4H),2.48(t,7.6Hz,2H),1.50(m,2H),1.29(m,2H),0.94(t,7.4Hz,3H).

13CNMR(150MHz,CDCl3):δ=168.02,142.41,138.75,134.66,133.95,132.80,132.50,130.81,129.40,129.22,128.59,128.38,127.75,127.69,124.14,119.60,108.28,35.55, 34.08,22.43,14.23.

HRMS: m/z [M+H]+calcd for C25H22ClNO: 388.147; found: 388.1468.

**(Z)-2-(4-bromophenyl)-3-(4-butylbenzylidene) isoindolin-1-one (3m)**

Yield: 87%, yellowish solid.

1HNMR(400MHz,CDCl3):δ=7.94(d,7.6Hz,1H),7.85(d,7.6Hz,1H),7.67(t,7.4Hz,1H),7.54(t,7.6Hz,1H),7.18(m,2H),6.92(m,2H),6.84(s,1H),6.77(dd,16Hz,8Hz,4H),2.48(t,7.6Hz,2H),

1.52(q,7.6Hz,2H),1.32(q,7.2Hz,2H),0.94(t,7.2Hz,3H).

13CNMR(150MHz,CDCl3):δ=167.95,142.45,138.75,135.16,133.86,132.81,131.13,130.78,129.40,129.20,128.92,127.73,127.69,124.15,120.46,119.60,35.56,34.12,22.49,14.27.

HRMS: m/z [M+H]+ calcd for C25H22BrNO:432.0965; found :432.0911

**(Z)-2-(4-bromophenyl)-3-(4-pentylbenzylidene) isoindolin-1-one (3n)**

Yield: 86%, light yellow solid.

1HNMR(400MHz,CDCl3):δ=7.94(d,7.6Hz,1H),7.85(d,8Hz,1H),7.67(m,1H),7.54(t,7.6Hz,1H),7.18(m,2H),6.92(m,2H),6.8(s,1H),6.77(m,4H),2.47(t,7.6Hz,2H),1.51(m,2H),1.32(m,4H),

0.92(m,3H).

13CNMR(150MHz,CDCl3):δ=167.96,142.53,138.76,135.16,133.86,132.81,131.34,130.78,129.41,129.21,128.93,127.74,127.67,124.15,120.45,119.61,108.32,35.88,31.70,31.69,22.77,14.35.

HRMS:m/z[M+H]+calcdforC26H24BrNO:446.1121;found:446.1084,448.1034.

**(Z)-2-(4-chlorophenyl)-3-(4-pentylbenzylidene) isoindolin-1-one (3o)**

Yield: 95%, white solid.

1HNMR(400MHz,CDCl3):δ=7.94(d,7.6Hz,1H),7.85(d,8.0Hz,1H),7.68(t,7.4Hz,1H),7.55(t,7.6Hz,1H),7.01(q,8.4Hz,3H),6.84(s,1H),6.76(m,4H),2.47(t,7.6Hz,2H),1.52(m,2H),1.32(m,4H),0.91(t,7.2Hz,3H).

13CNMR(150MHz,CDCl3):δ=168.03,142.49,138.77,134.67,133.95,132.81,132.50,130.81,129.41,129.24,128.59,128.38,127.76,127.67,124.15,119.61,108.29,35.87,31.66,31.64,22.77,14.32.

HRMS: m/z [M+H]+calcd for C26H24ClNO: 402.1626; found : 402.1593.

**(Z)-3-(4-pentylbenzylidene)-2-(m-tolyl) isoindolin-1-one (3p)**

Yield: 89%, white solid.

1H NMR (400MHz,CDCl3): δ= 7.87(d,7.6Hz,1H), 7.77(d,7.6Hz,1H), 7.58(t,7.4Hz,1H), 7.46(t,7.4Hz,1H), 6.92(m,2H), 6.75(m,2H), 6.67(m,5H), 2.36(t,7.6Hz,2H), 1.99(s,3H), 1.41(m,2H), 1.27(m,2H), 1.16(m,2H), 0.84(t,7.2 Hz,3H).

13CNMR(150MHz,CDCl3):δ=168.16,141.74,138.86,138.13,135.82,134.17,132.51,131.19,129.21,129.00,128.29,128.19,128.03,127.56,127.43,124.61,124.03,119.50,108.12,35.74,31.46,31.36,22.79,21.22,14.29.

HRMS: m/z [M+H]+ calcd for C27H27NO :382.2173; found:382.2169.

**(Z)-3-(4-butylbenzylidene-2-phenylisoindolin-1-one (3q)**

Yield: 88%, light yellow solid.

1HNMR (400MHz,CDCl3):δ= 7.88(d,7.2 Hz,1H),7.78(d, 7.6Hz, 1H), 7.59 (t,7.4Hz,1H),7.47(t,7.4Hz,1H),6.98(m,5H),6.75(s,1H),6.66(q,8.0Hz,4H),2.36(t,7.6Hz,2H),1.39(p,7.4Hz,2H),1.19(m,2H),0.84(t,7.2 Hz,3H)

13CNMR(150MHz,CDCl3):δ=168.20,141.78,138.92,136.14,134.06,132.59,131.01,129.25,129.17,128.33,127.96,127.57,127.45,126.81,124.08,119.54,108.19,35.43,33.77,22.25,14.19.

HRMS: m/z [M+H]+ calcd for C25H23NO:354.186; found: 354.1827

**(Z)-3-butylidene-2-phenylisoindolin-1-one (3r)**

Yield: 90%, white solid.

1HNMR(400MHz,CDCl3): δ= 7.82(d,7.6 Hz,1H),7.62(d,8.0Hz,1H),7.53(t,7.6 Hz,1H),7.4-7.3(m,4H),7.28(d,7.2Hz,2H),5.57(t,7.8Hz,1H),1.57(m,2H),1.21(h,7.6Hz,2H),

0.64(t,7.2Hz, 3H).

13CNMR(150MHz,CDCl3):δ=168.18,138.33,137.37,135.00,132.21,129.37,128.90,128.68,128.54,128.02,123.75,119.12,110.41,28.49,23.23,13.86.

HRMS: m/z [M+H]+calcd for C18H17NO: 264.1390;foumd: 264.1523

**Z)-2-(4-bromophenyl)-3-butylideneisoindolin-1-one (3s)**

Yield: 85%, yellowish solid.

1HNMR(400MHz,CDCl3):δ=7.81(d,7.6Hz,1H),7.62(d,8Hz,1H),7.54(m,3H),7.42(t,7.6Hz,1H),7.18(m,3H),1.63(q,7.6Hz,2H),1.26(h,2Hz,2H),0.69(m,3H).

13CNMR(100MHz,CDCl3):δ=167.17,138.35,137.53,134.83,132.57,132.52,132.49,132.29,131.83,130.43,128.86,128.36,128.17,124.11,123.85,122.31,119.20,110.61,93.30,28.81,23.17,13.85.

HRMS: m/z [M+H]+ calcd for C18H16BrNO: 342.0495 ;found:342.6997.

**(Z)-3-butylidene-2-(4-chlorophenyl) isoindolin-1-one (3t)**

Yield: 82%, yellowish solid.

1H NMR (400MHz, CDCl3): δ = 7.88(d,7.6Hz, 1H), 7.69(d,7.6Hz,1H), 7.61(m,1H),7.50-7.44(m,3H), 7.32-7.28(m,2H), 5.65(t,7.8Hz,1H), 1.69(q,7.6Hz,2H), 1.35-1.28(m,2H), 0.76(t,7.2Hz,3H).

HRMS: m/z [M+H]+ calcd for C18H16ClNO: 298.10 ;found:298.1049.

**(Z)-3-butylidene-2-(4-methoxyphenyl) isoindolin-1-one (3u)**

Yield: 86%, colorless solid.

1H NMR (400MHZ, CDCl3): δ = 7.87(d,7.6Hz,1H), 7.67(d,7.6Hz, 1H), 7.57(m,1H), 7.46(t,7.8Hz, 1H), 7.25-7.22(m,2H), 7.00-6.96(m,2H), 5.61(t,8.0Hz,1H), 3.85(s,3H), 1.66(m,2H), 1.32-1.07(m,2H), 0.73(t,7.2Hz,3H).

HRMS: m/z [M+Na]+ calcd for C19H19NO2: 316.1313 ;found:316.0911.

**(Z)-3-benzylidene-2(2, 4-dimethylphenyl) isoindolin-1-one (3v)**

Yield: 87%, yellow solid.

1H NMR (400MHZ, CDCl3): δ = 7.94(d,7.2Hz,1H),7.83(d,8Hz,1H), 7.66(m,1H),7.54(t,7.4Hz,1H),6.97-6.93(m,1H), 6.90-6.86(m,2H),6.82-6.78(m,5H), 6.71(d,8Hz,1H), 2.19(s,3H), 2.06(s,3H).

HRMS: m/z [M+H]+ calcd for C23H19NO: 326.1547; found:326.1493.

**(Z)-3-benzylidene-2-(3-chlorophenyl) isoindolin-1-one (3w)**

Yield: 84%, yellow solid.

1H NMR (400MHZ, CDCl3): δ = 7.94(d,7.6Hz,1H), 7.85(d,7.6Hz,1H), 7.68(t,7.4Hz,1H), 7.55(t,7.4Hz,1H), 7.02-6.95(m,7H), 6.87(t,6.6Hz,3H).

HRMS: m/z [M+H]+ calcd for C21H14ClNO: 332.0764; found:332.0384.

**(Z)-3-benzylidene-2-(4-methoxyphenyl) isoindolin-1-one (3x)**

Yield: 84%, colorless solid.

1H NMR (400MHZ, CDCl3): δ = 7.94(d,7.6Hz,1H), 7.85(d,7.6Hz,1H), 7.67(td,8.0Hz,0.8Hz,1H), 7.56-7.52(m,1H), 7.01-6.92(m,5H), 6.86(d,7.2Hz,2H), 6.82(s,1H), 6.62(m,2H), 3.71(s,3H).

HRMS: m/z [M+H]+ calcd for C22H17NO2: 328.1293; found:328.0916.

**Characterisation of data**

**1H NMR of (Z)-3-benzylidene-2-phenylisoindolin-1-one (3a):**


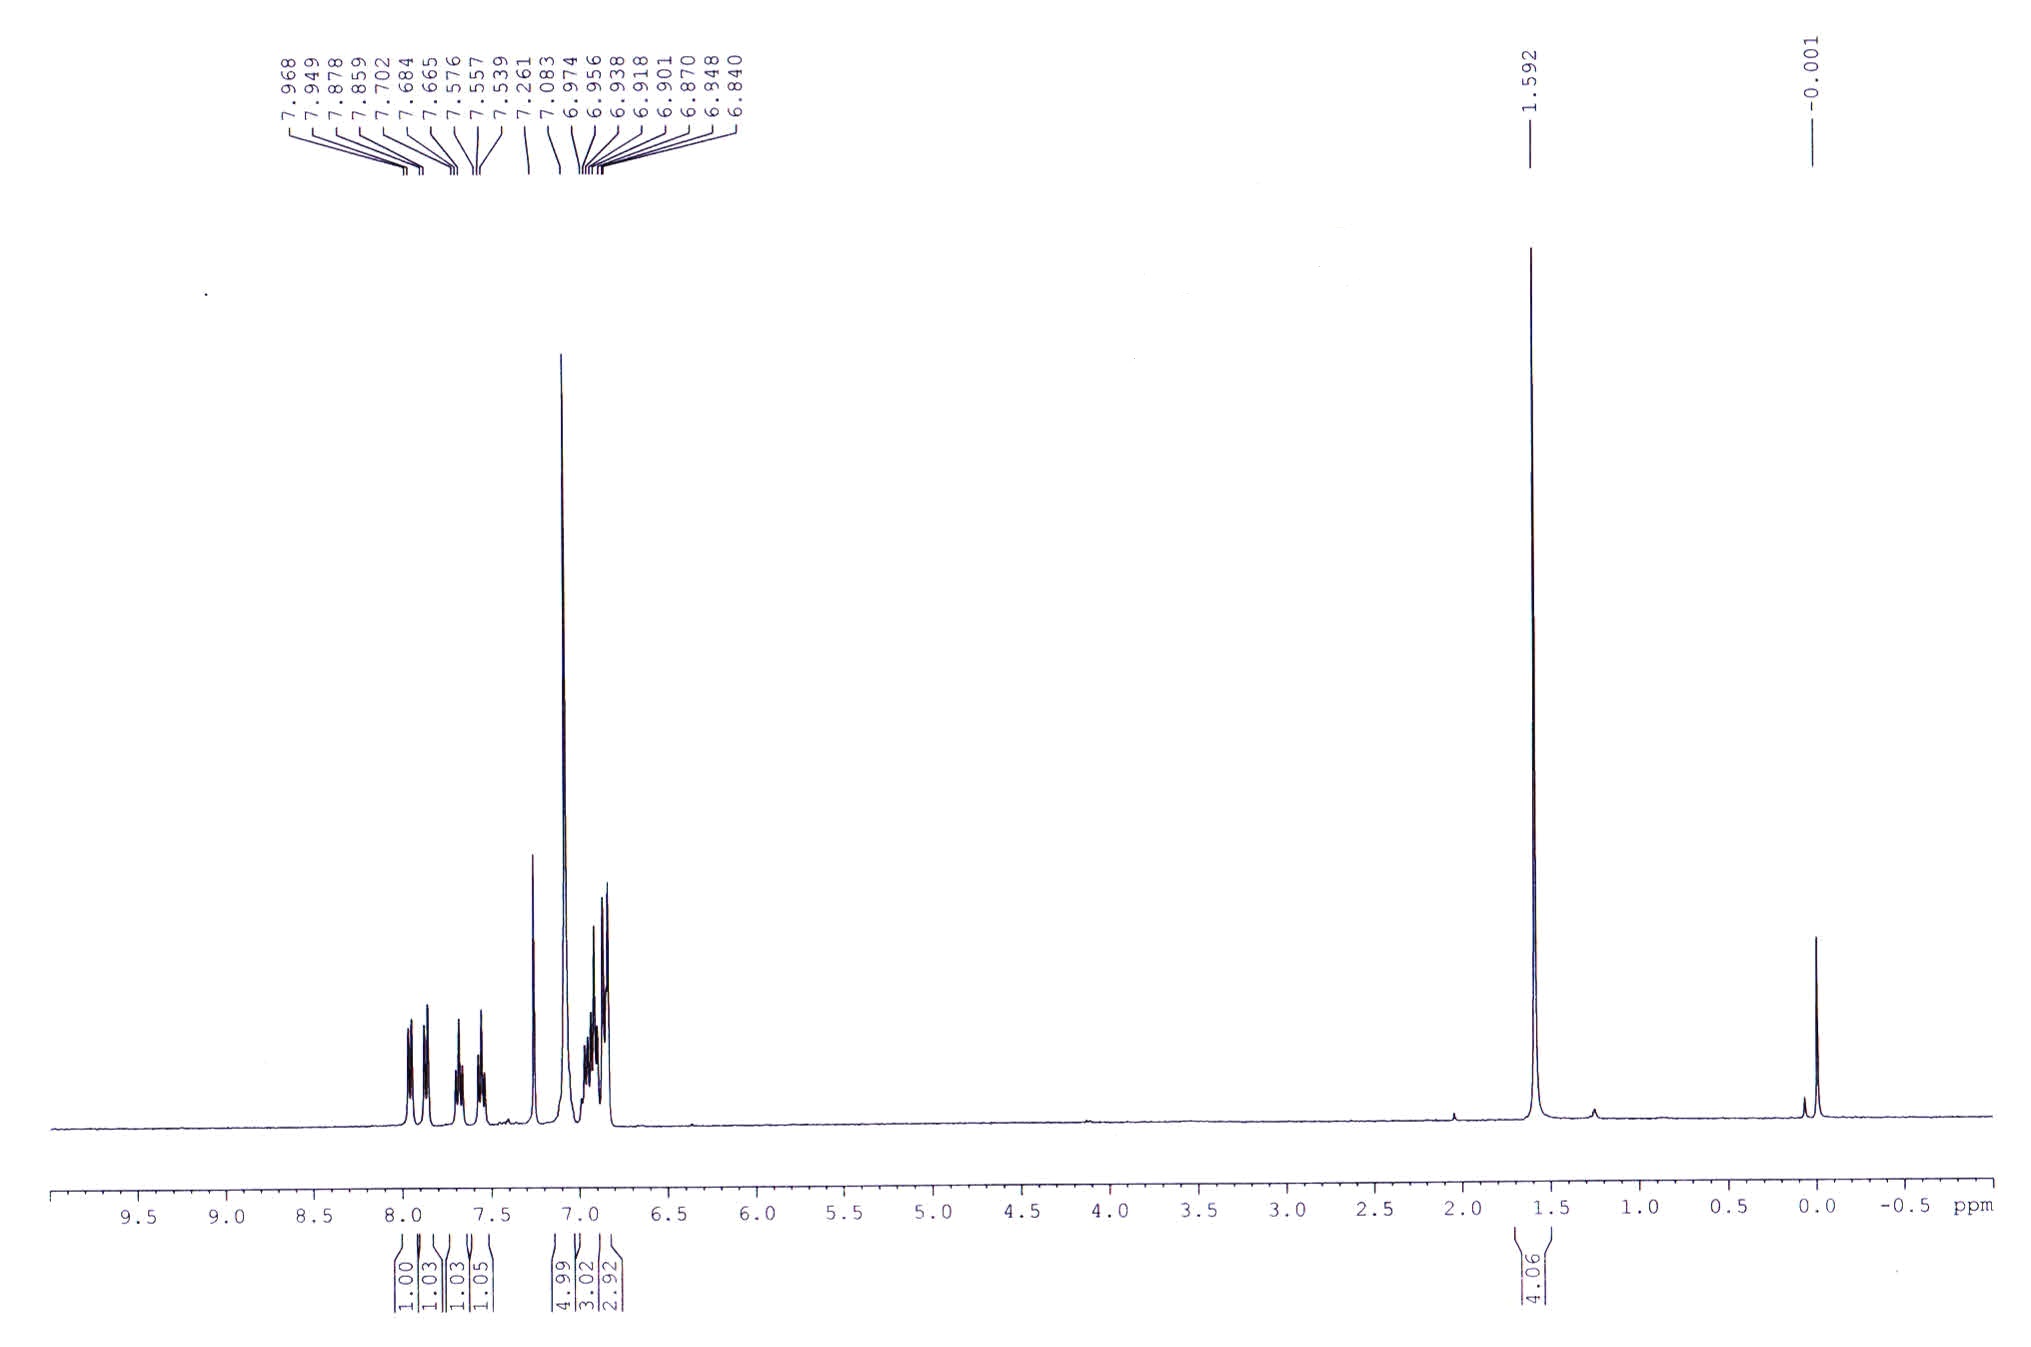


**13C NMR of (Z)-3-benzylidene-2-phenylisoindolin-1-one (3a):**

**1H NMR of (Z)-3-benzylidene-2-(4-bromophenyl) isoindolin-1-one (3b):**


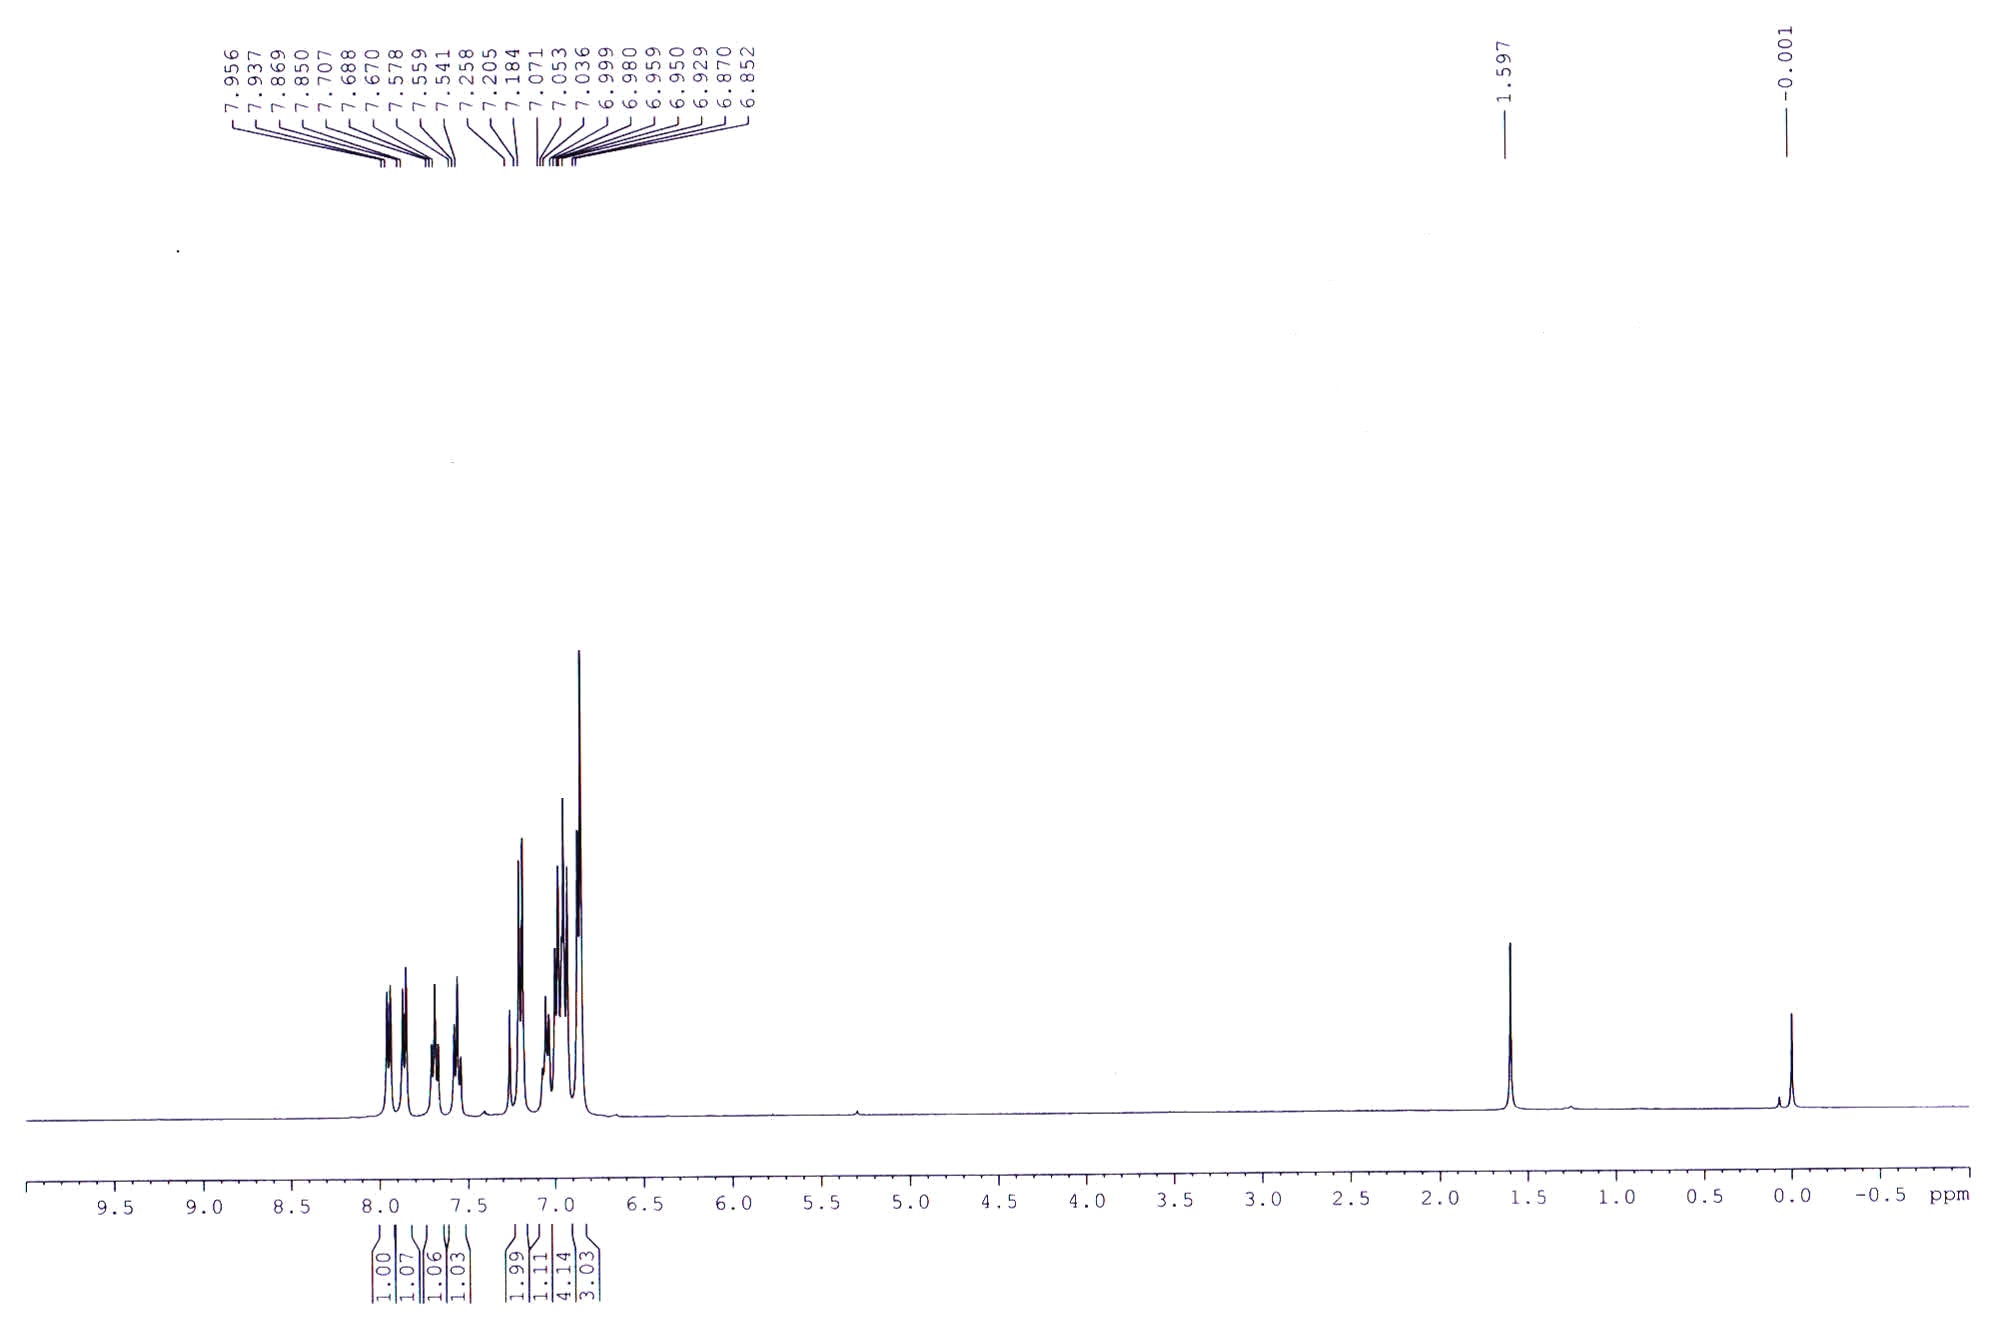


**13CNMR of (Z)-3-benzylidene-2-(4-bromophenyl) isoindolin-1-one (3b):**

**1H NMR of (Z)-3-benzylidene-2-(4-chlorophenyl) isoindolin-1-one (3c):**


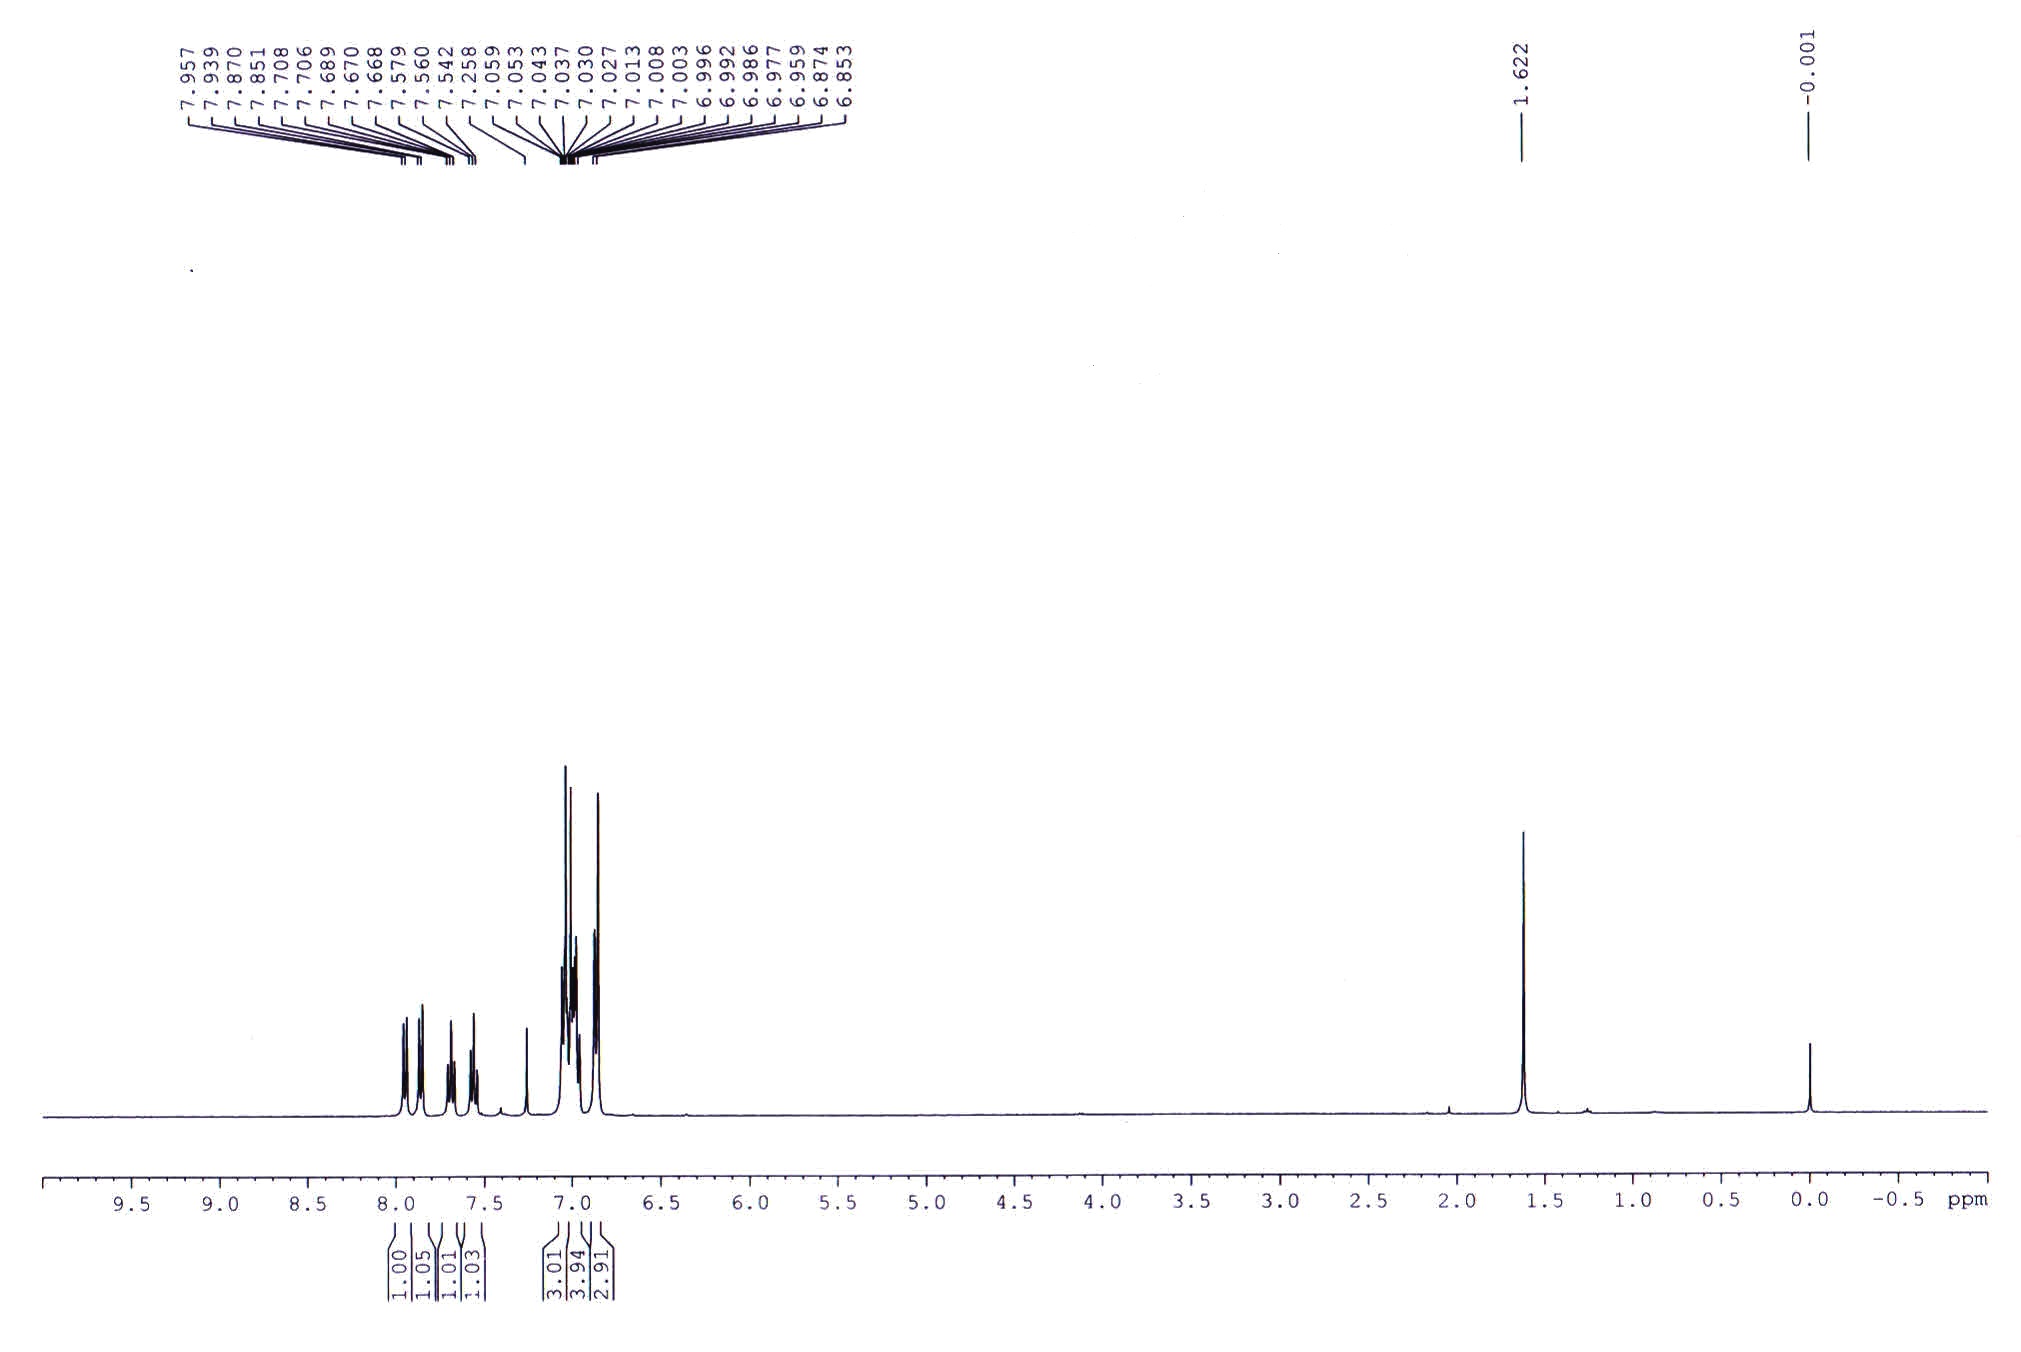


**13CNMR of (Z)-3-benzylidene-2-(4-chlorophenyl) isoindolin-1-one (3c):**

**1H NMR of (Z)-3-benzylidene-2-(m-tolyl) isoindolin-1-one (3d):**


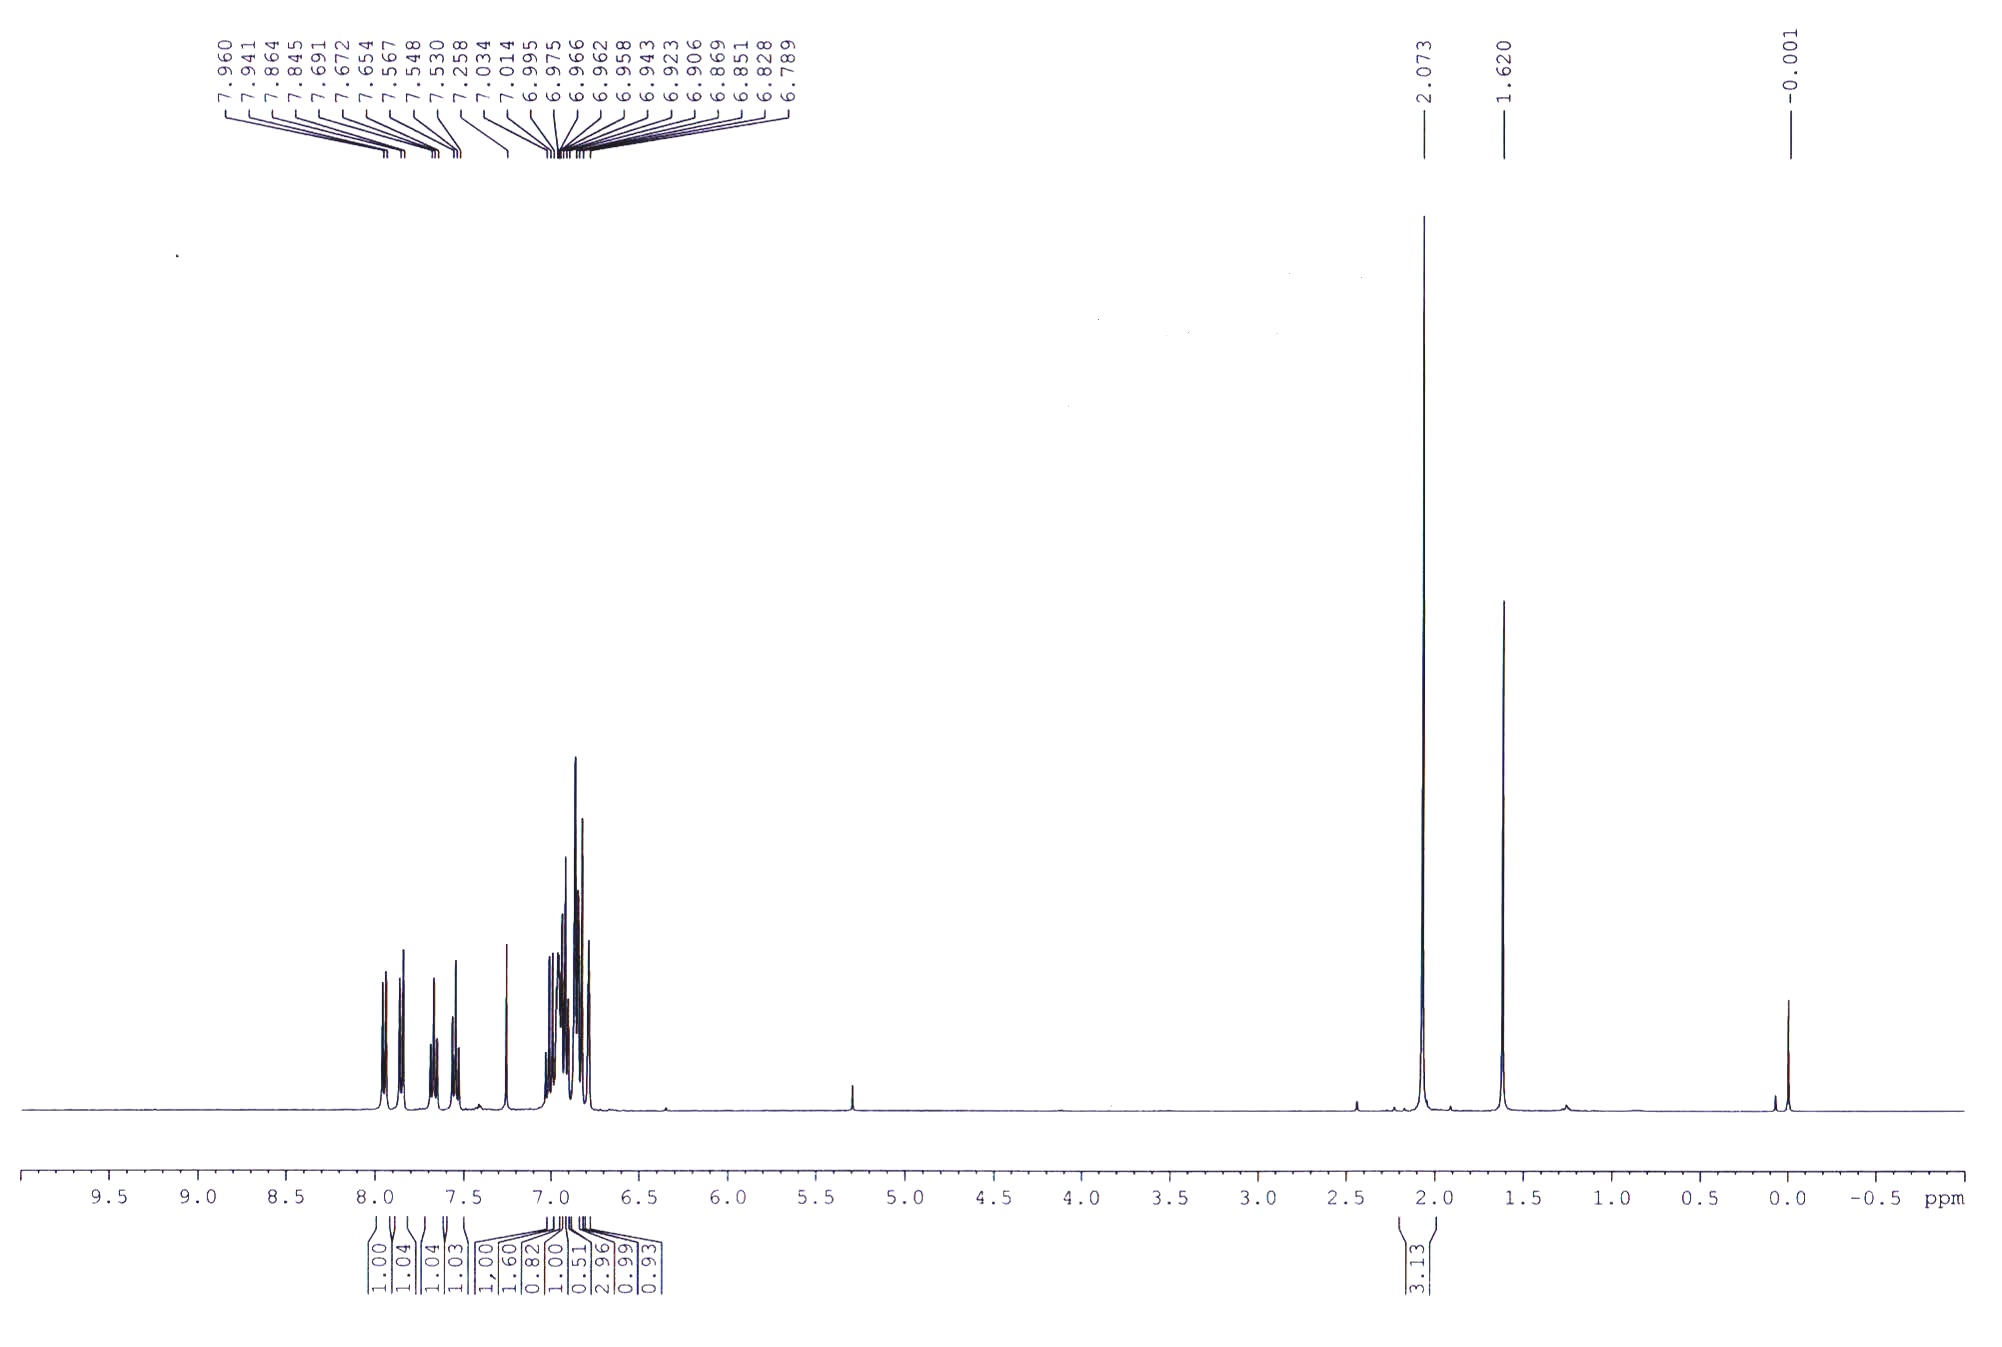


**13C NMR of (Z)-3-benzylidene-2-(m-tolyl) isoindolin-1-one (3d):**

**1H NMR of (Z)-2-(4-bromophenyl)-3-(4-methylbenzylidene) isoindolin-1-one (3e):**


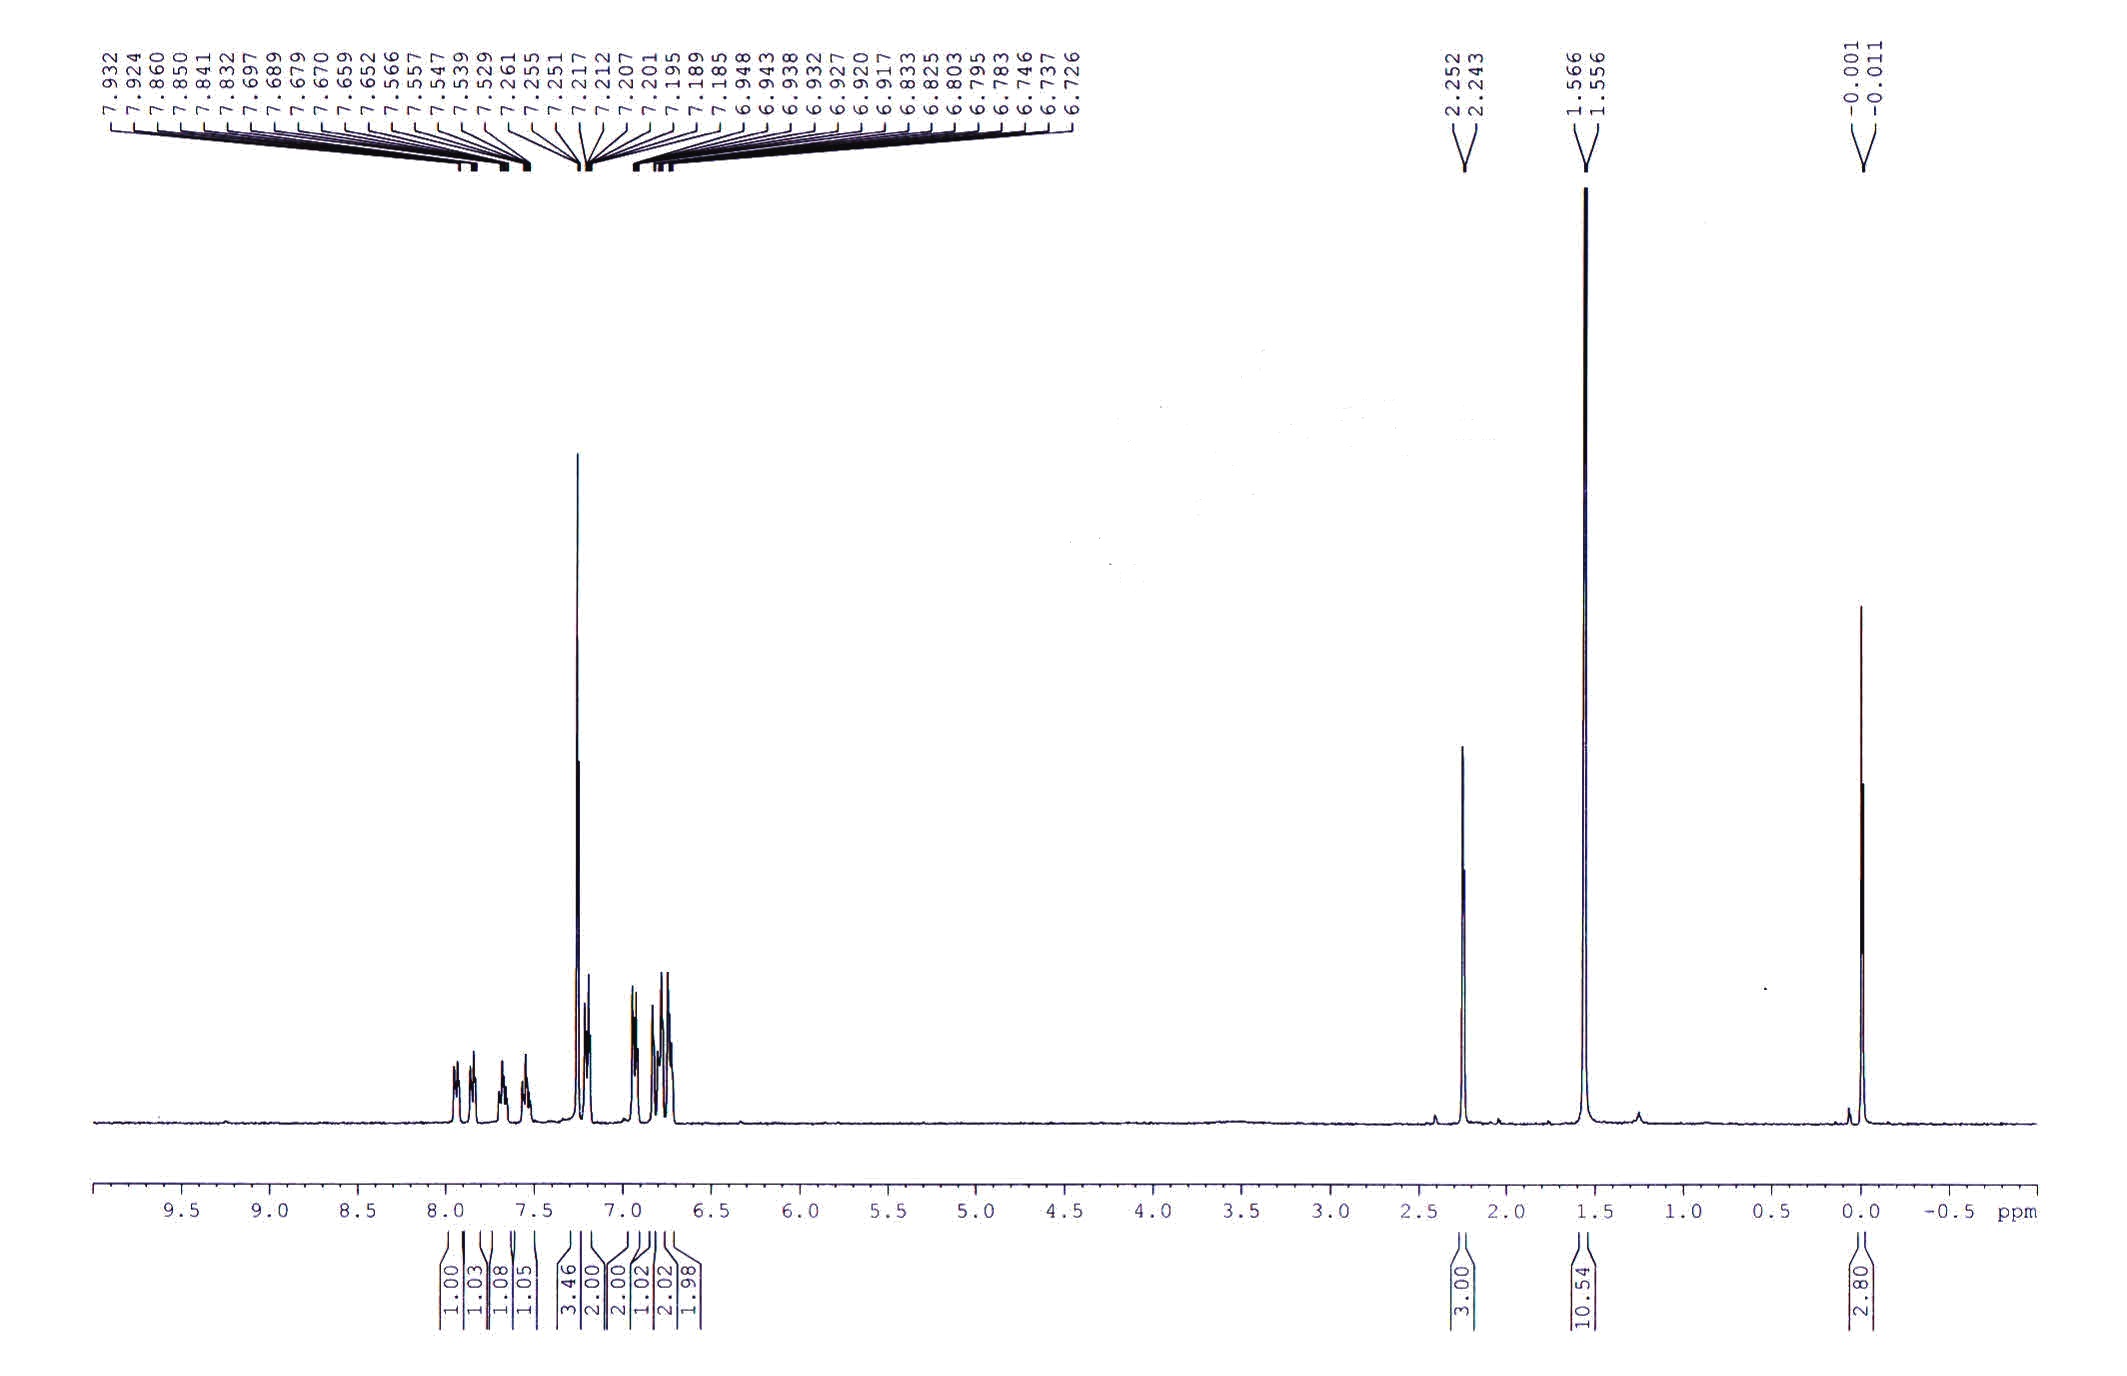


**13C NMR of (Z)-2-(4-bromophenyl)-3-(4-methylbenzylidene) isoindolin-1-one (3e):**

**1H NMR of (Z)-2-(4-chlorophenyl)-3-(4-methylbenzylidene) isoindolin-1-one (3f):**


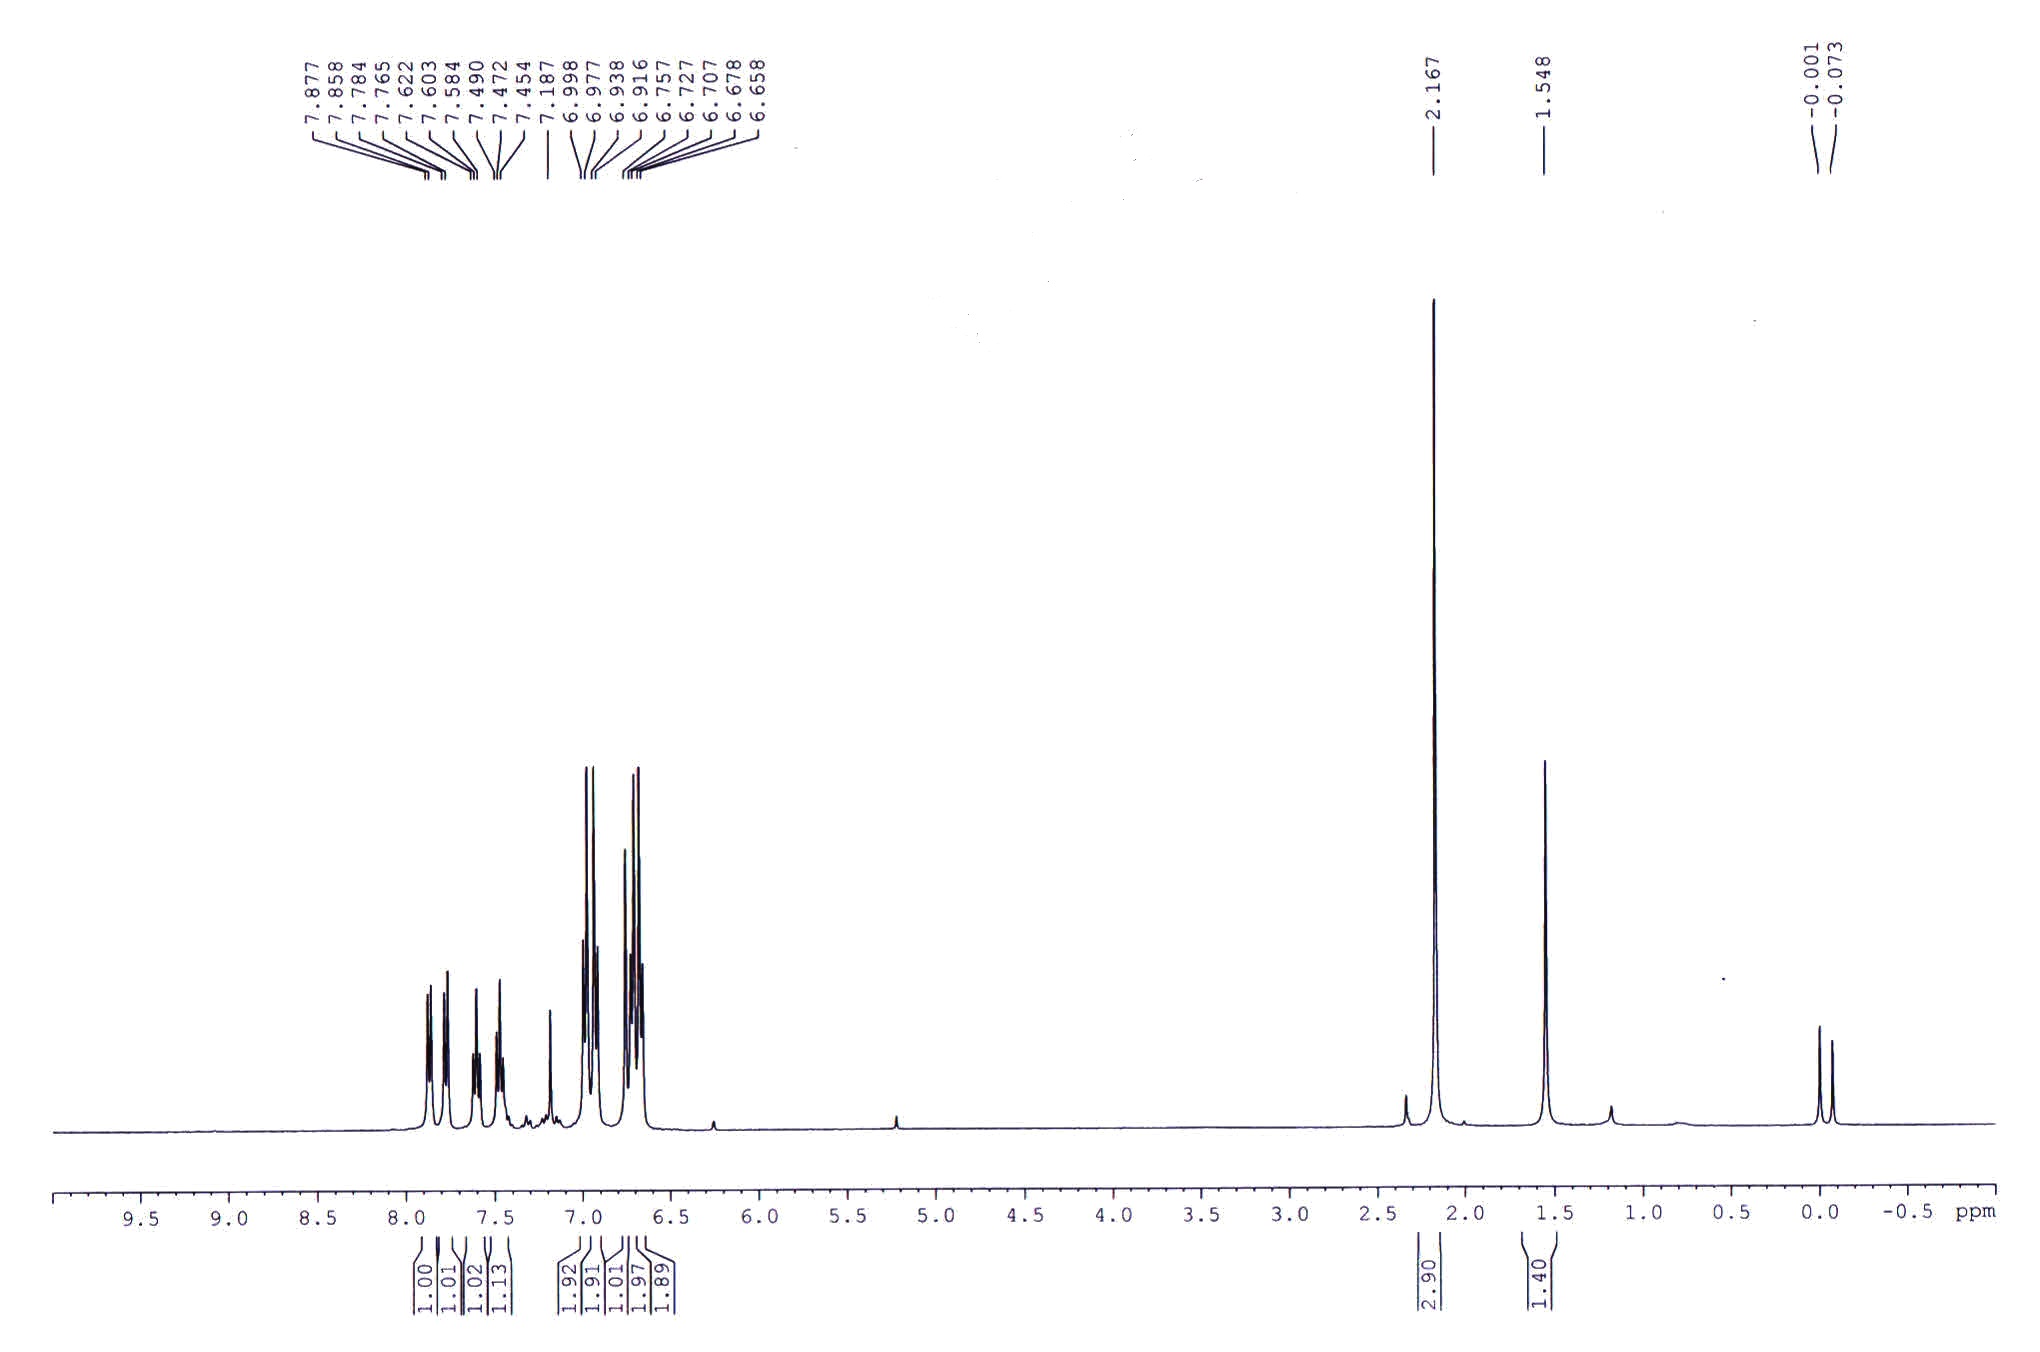


**13C NMR of (Z)-2-(4-chlorophenyl)-3-(4-methylbenzylidene) isoindolin-1-one (3f):**

**1H NMR of (Z)-3-(4-methylbenzylidene)-2-(m-tolyl) isoindolin-1-one (3g):**


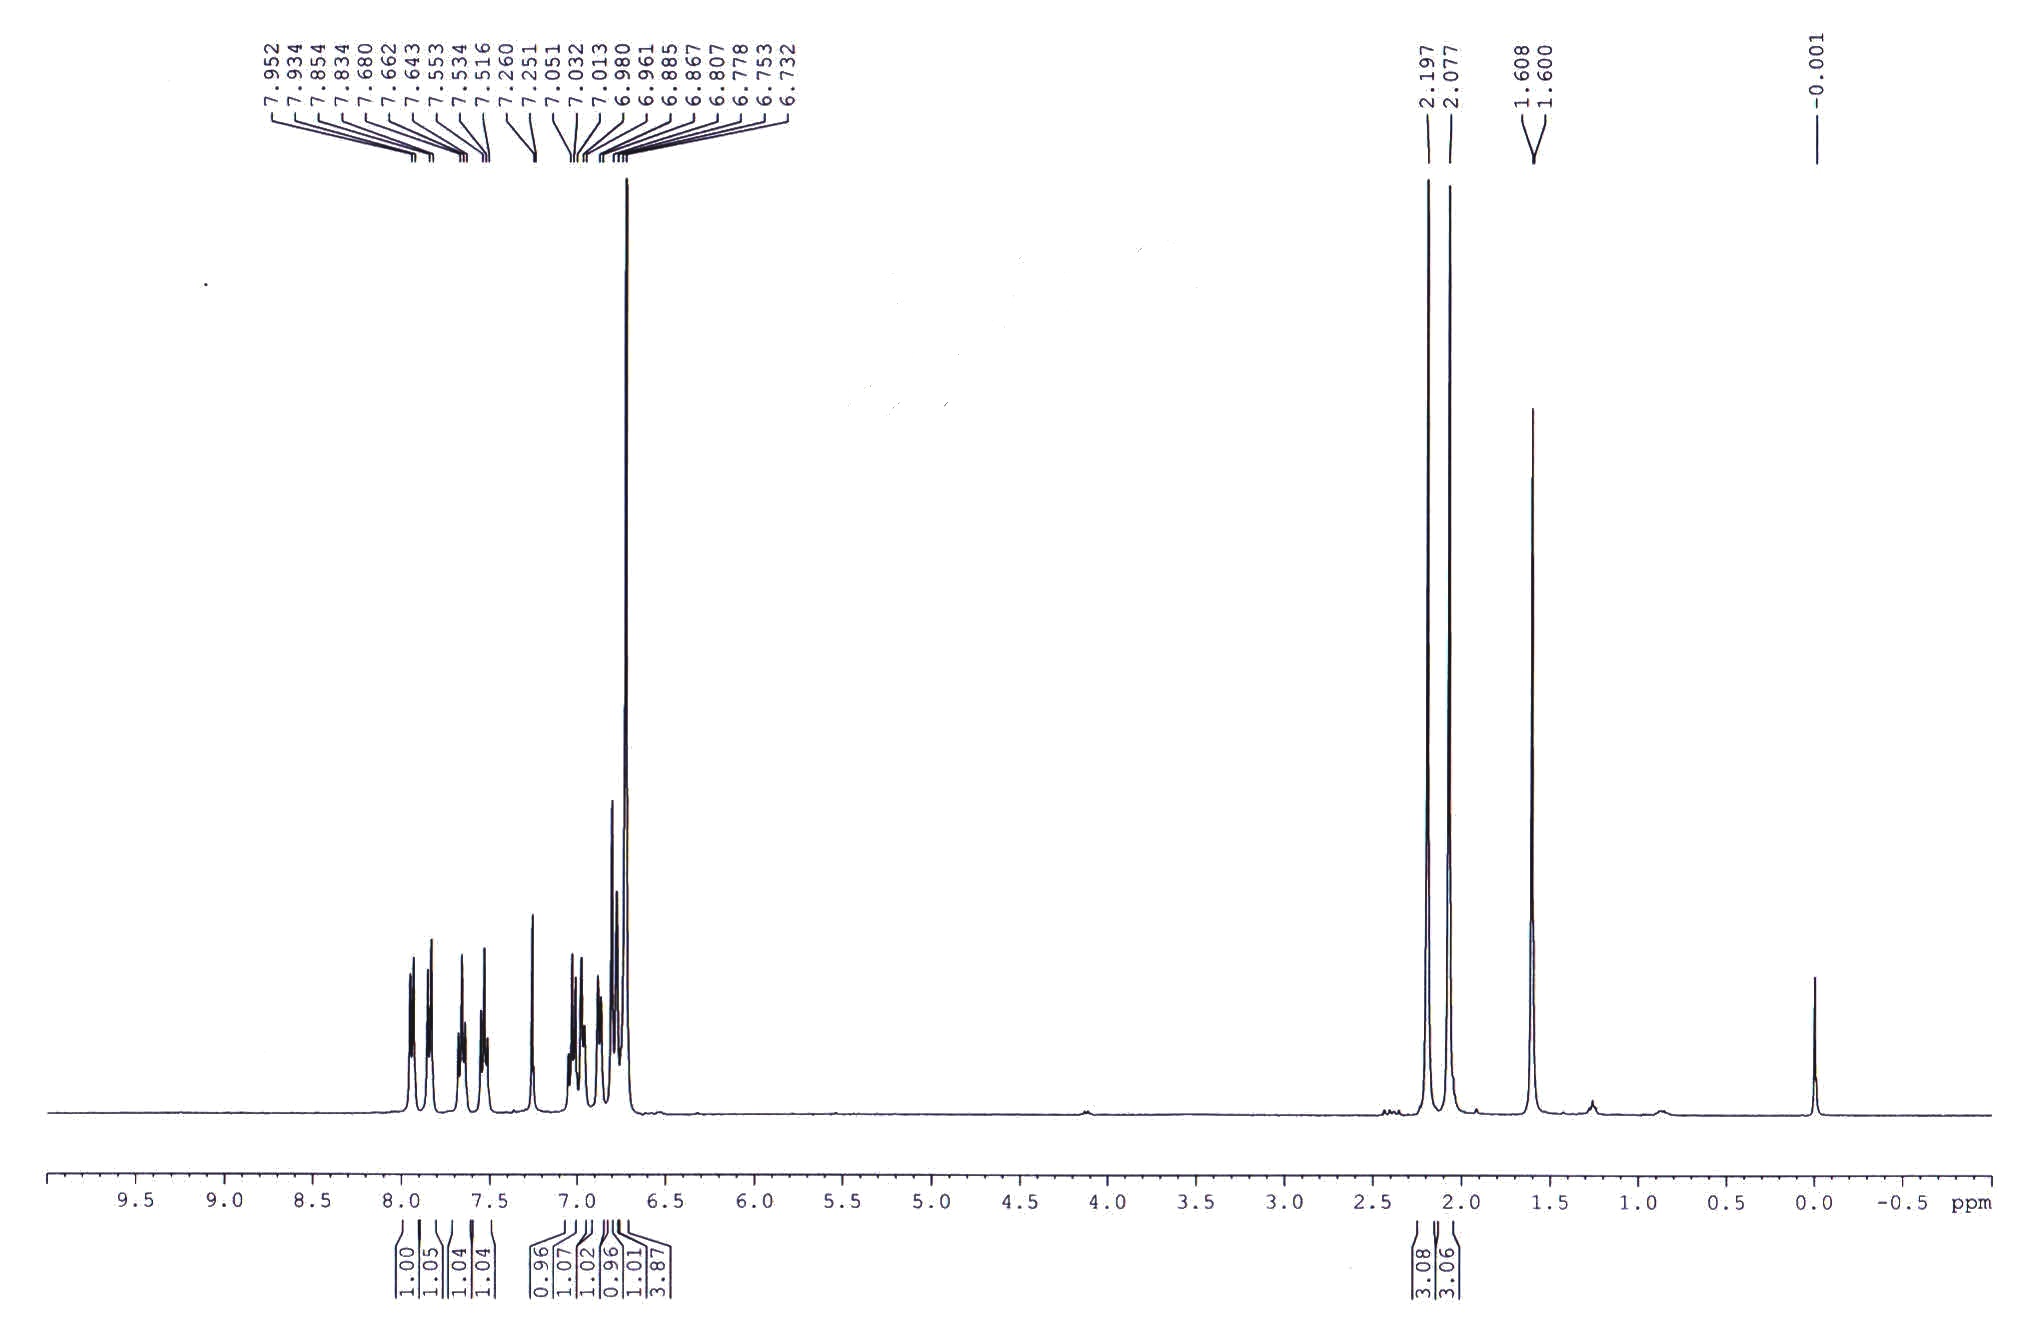


**13C NMR of (Z)-3-(4-methylbenzylidene)-2-(m-tolyl) isoindolin-1-one (3g):**

**1H NMR of (Z)-3-(4-methylbenzylidene)-2-phenylisoindolin-1-one (3h):**


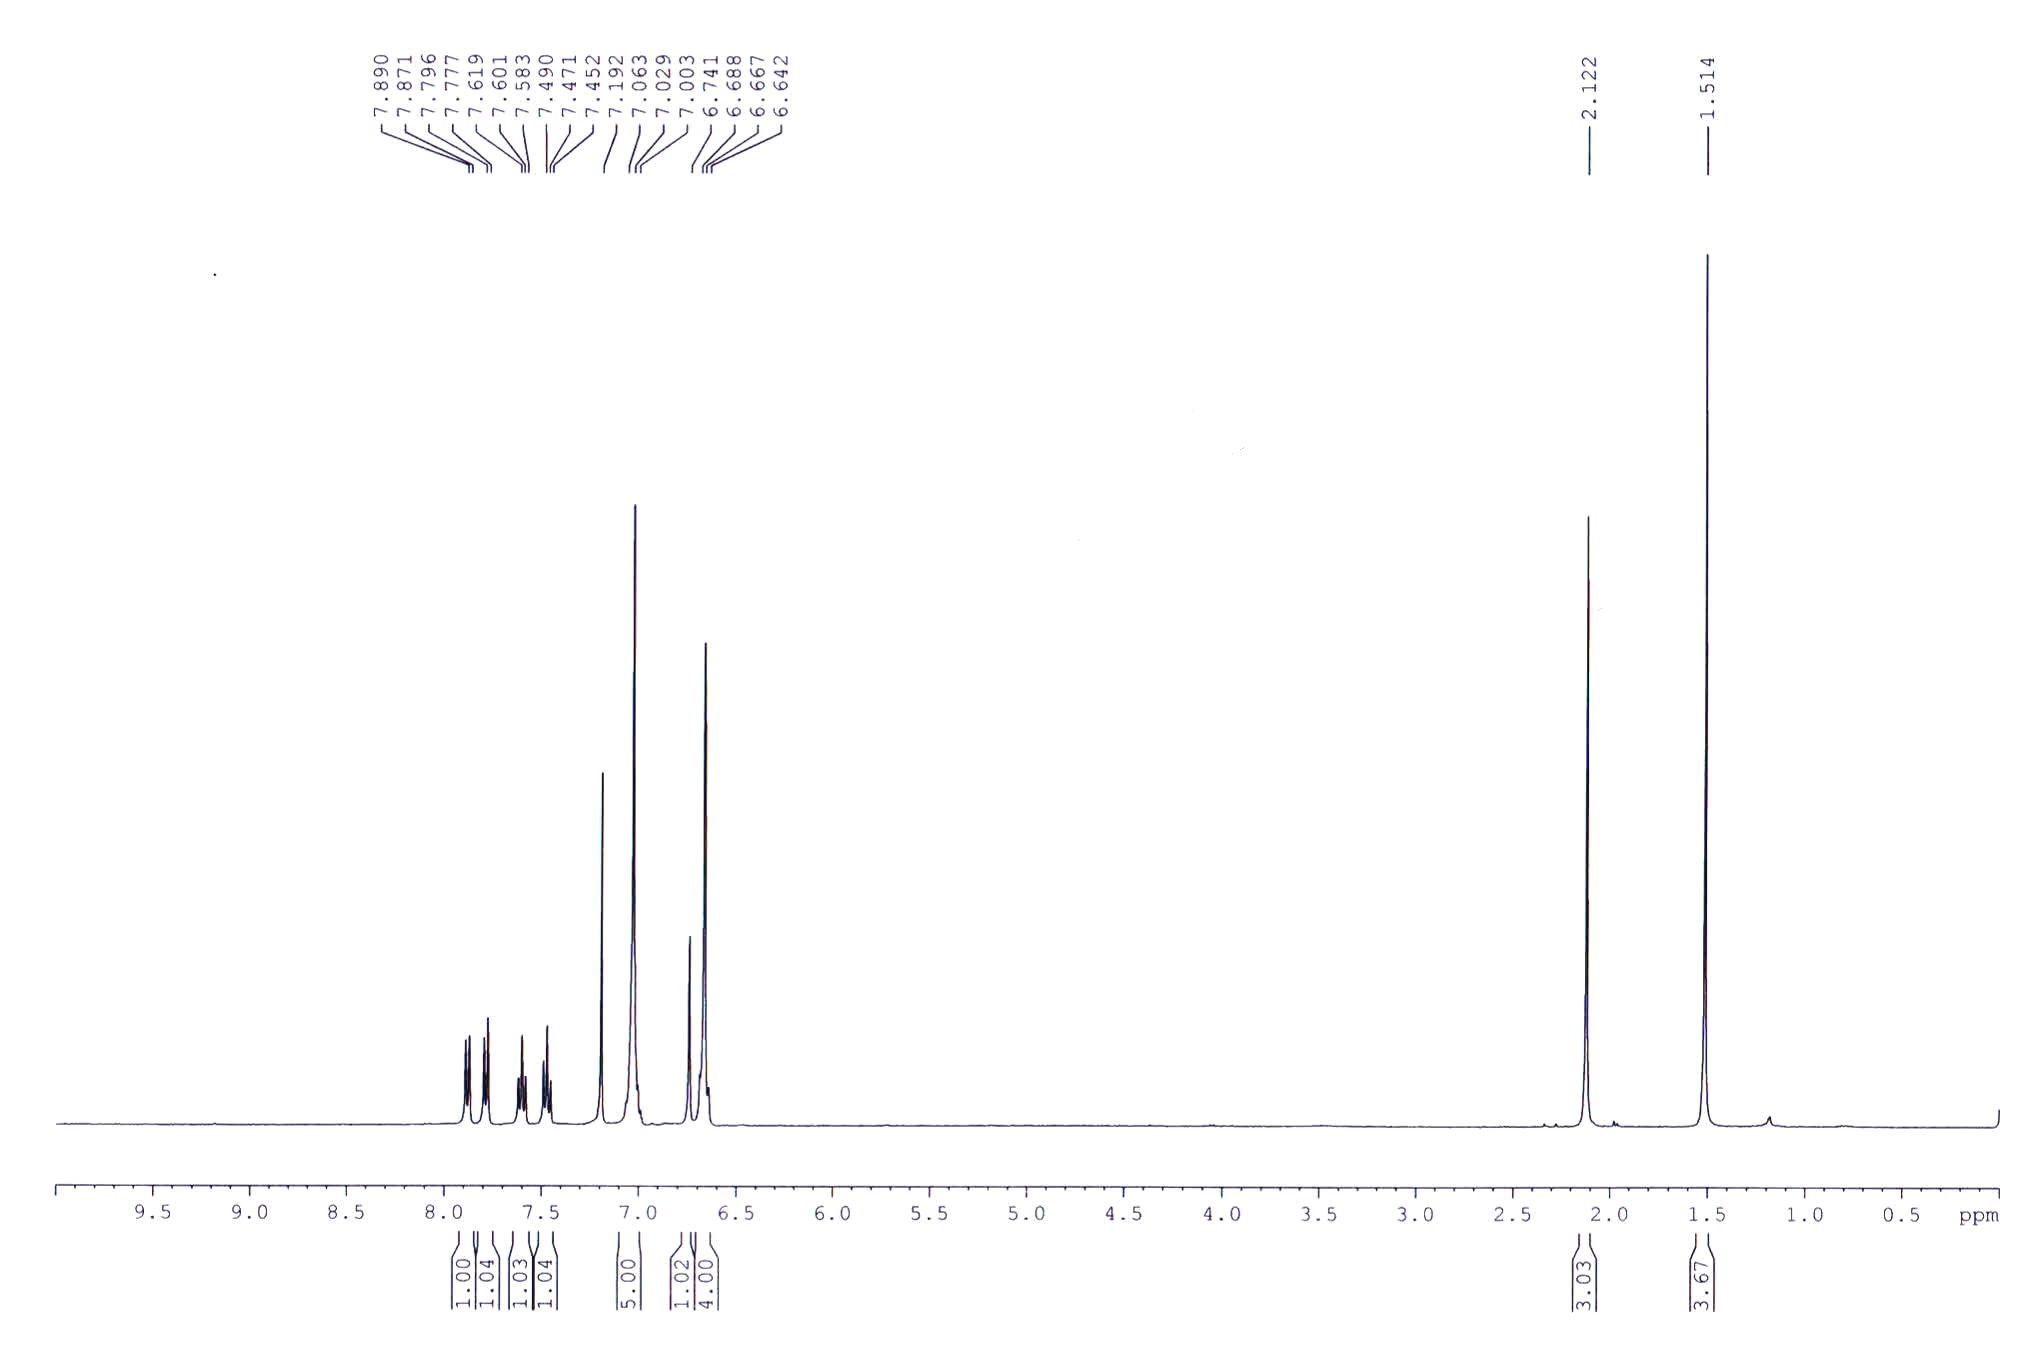


**13C NMR of (Z)-3-(4-methylbenzylidene)-2-phenylisoindolin-1-one (3h):**

**1H NMR of (Z)-3-(4-tert-butylbenzylidene)-2-phenylisoindolin-1-one (3i):**


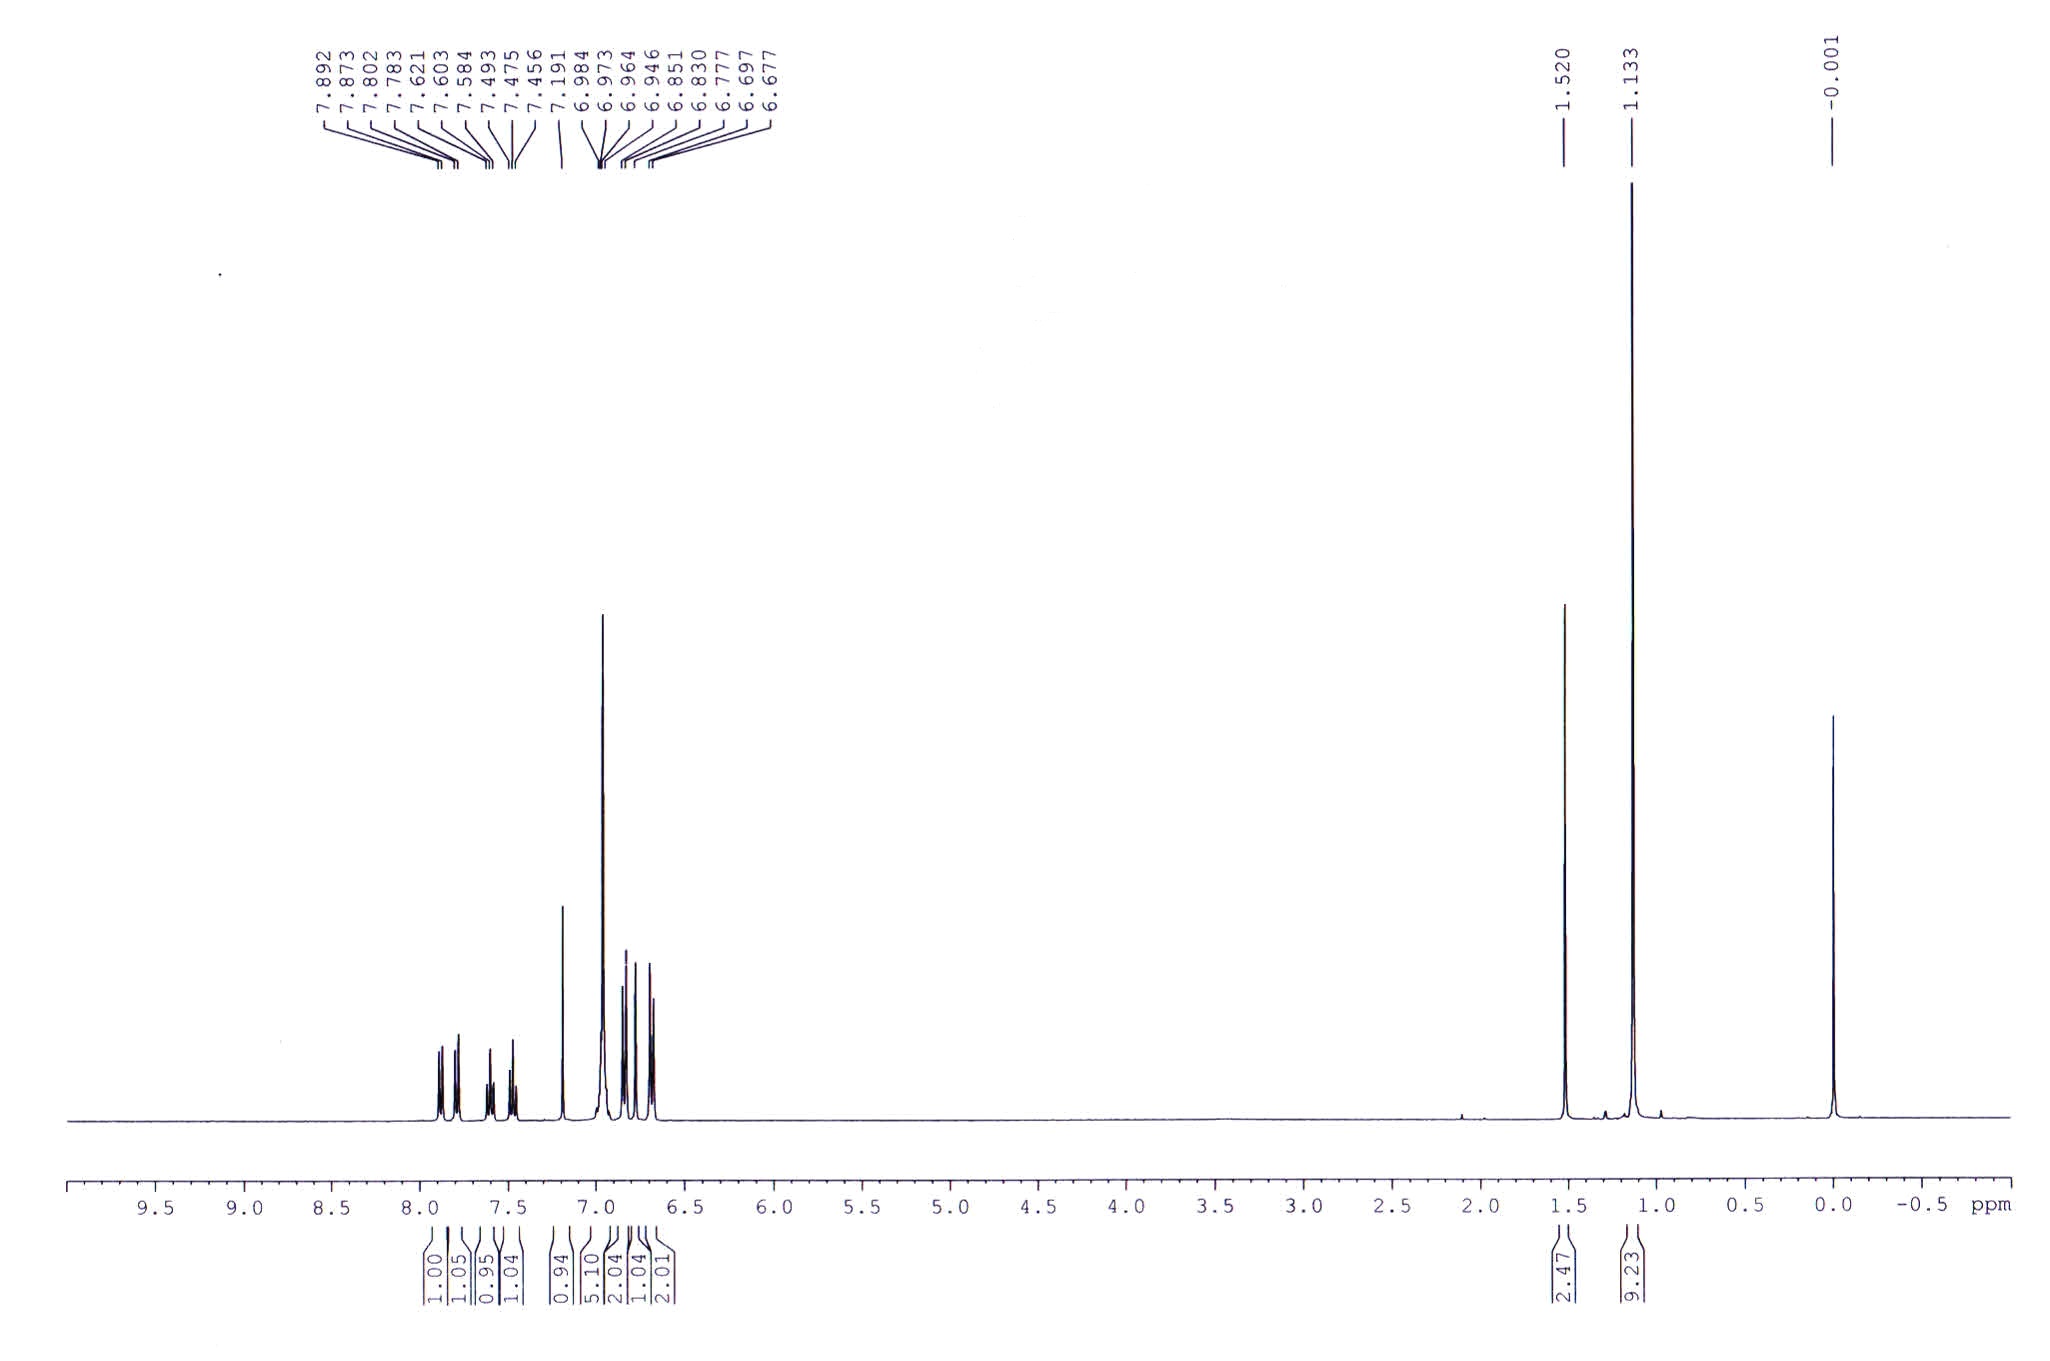


**13C NMR of (Z)-3-(4-tert-butylbenzylidene)-2-phenylisoindolin-1-one (3i):**

**1H NMR of (Z)-3-(4-butylbenzylidene)-2-phenylisoindolin-1-one (3j):**


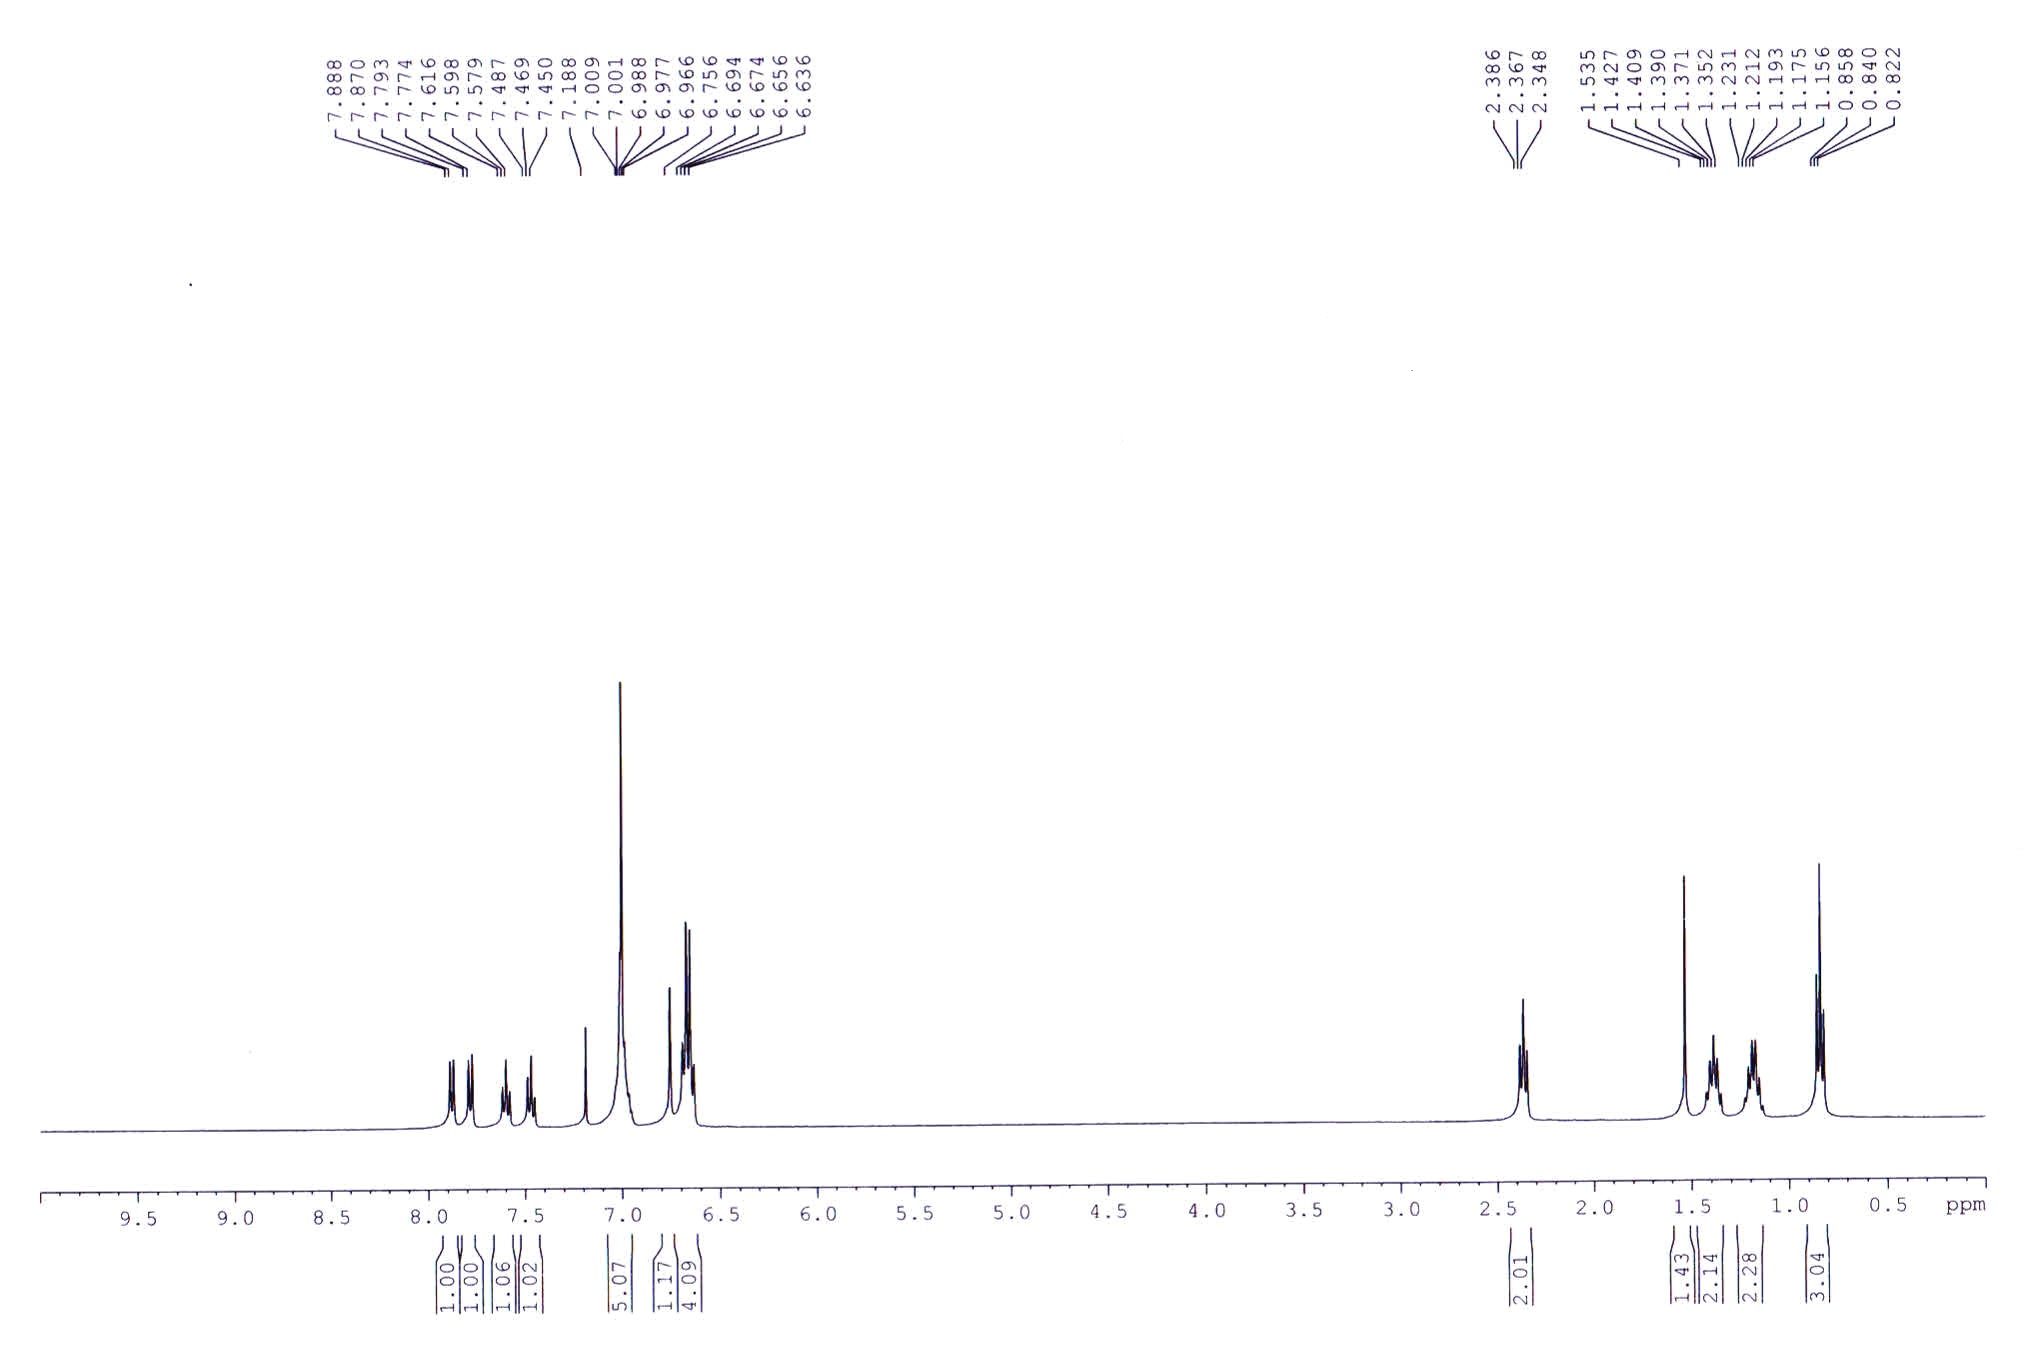


**13CNMR of (Z)-3-(4-butylbenzylidene)-2-phenylisoindolin-1-one (3j):**

**1H NMR of (Z)-3-(4-butylbenzylidene)-2-(m-tolyl) isoindolin-1-one (3k):**


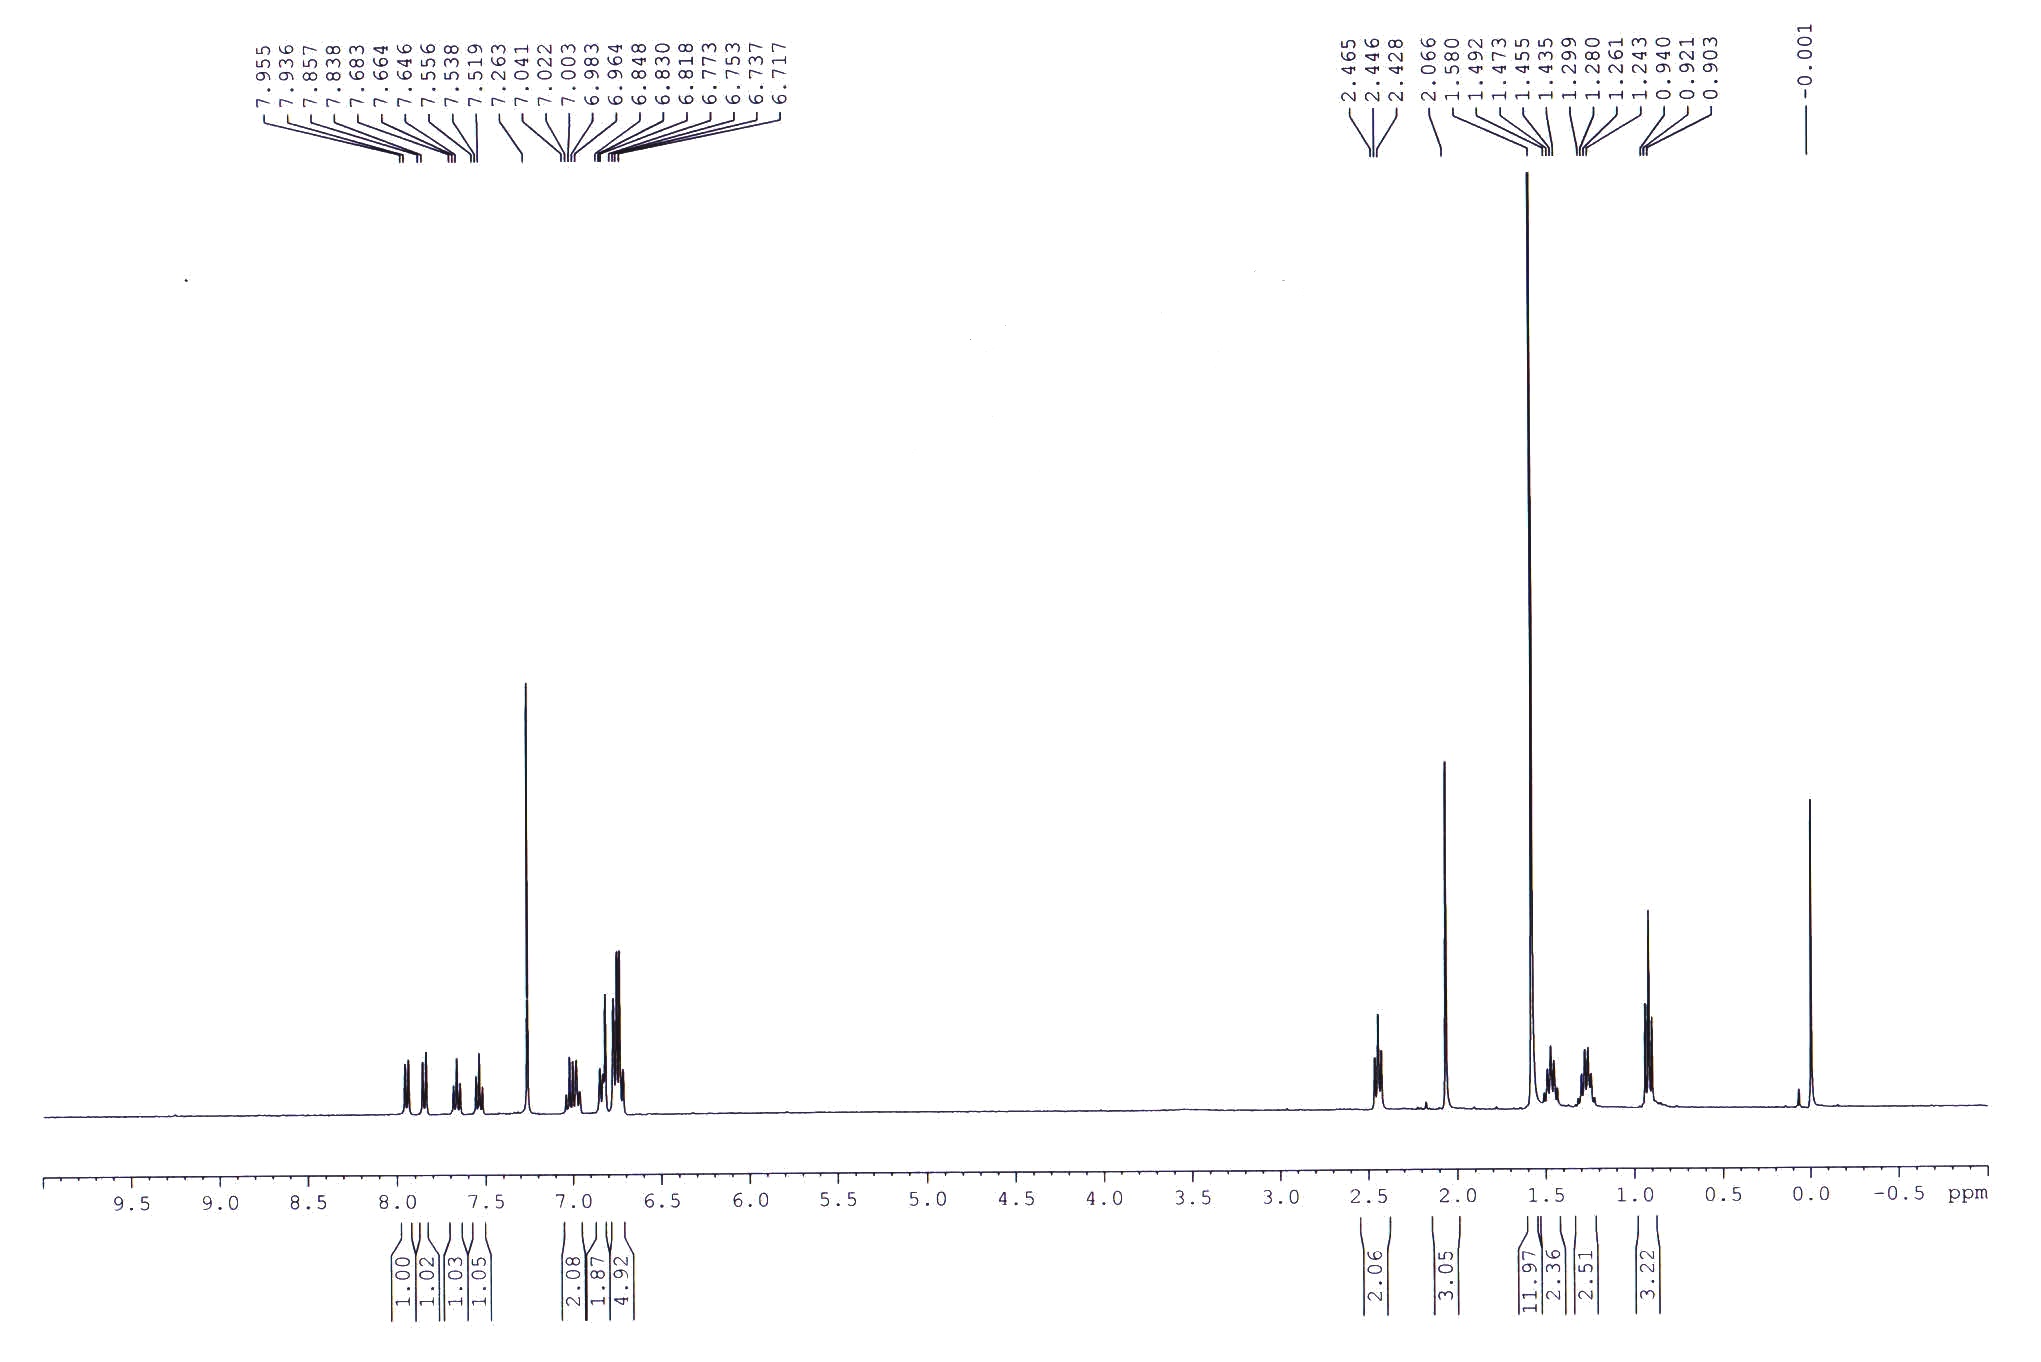


**13C NMR of (Z)-3-(4-butylbenzylidene)-2-(m-tolyl) isoindolin-1-one (3k):**

**1H NMR of (Z)-3-(4-butylbenzylidene)-2-(4-chlorophenyl) isoindolin-1-one (3l):**


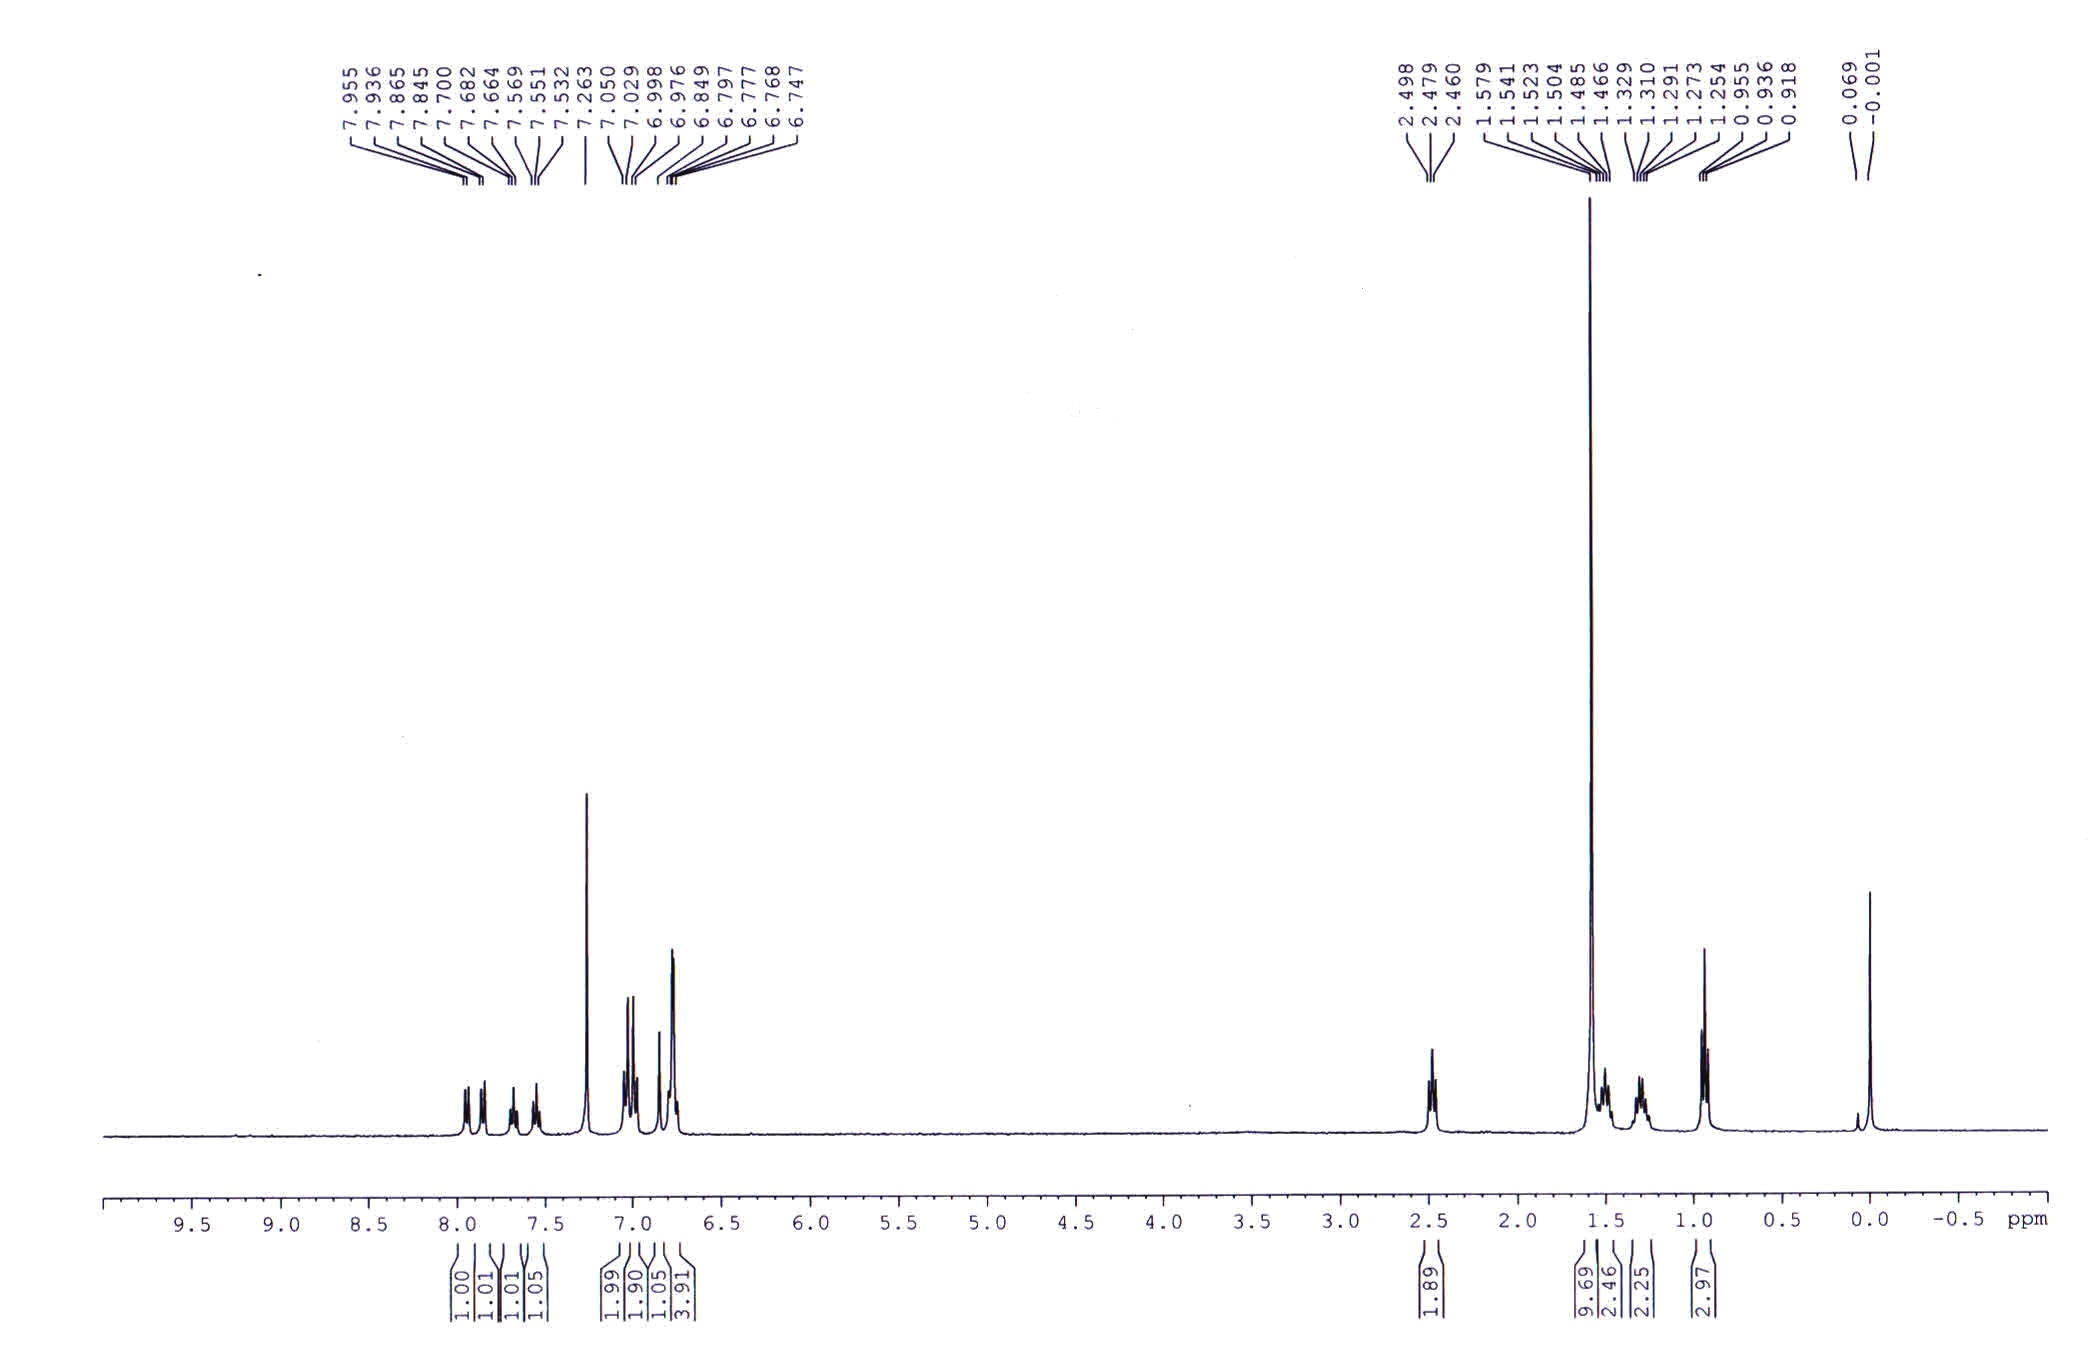


**13C NMR of (Z)-3-(4-butylbenzylidene)-2-(4-chlorophenyl) isoindolin-1-one (3l):**

**1H NMR of (Z)-(4-bromophenyl)-3-(4-butylbenzylidene) isoindolin-1-one (3m):**


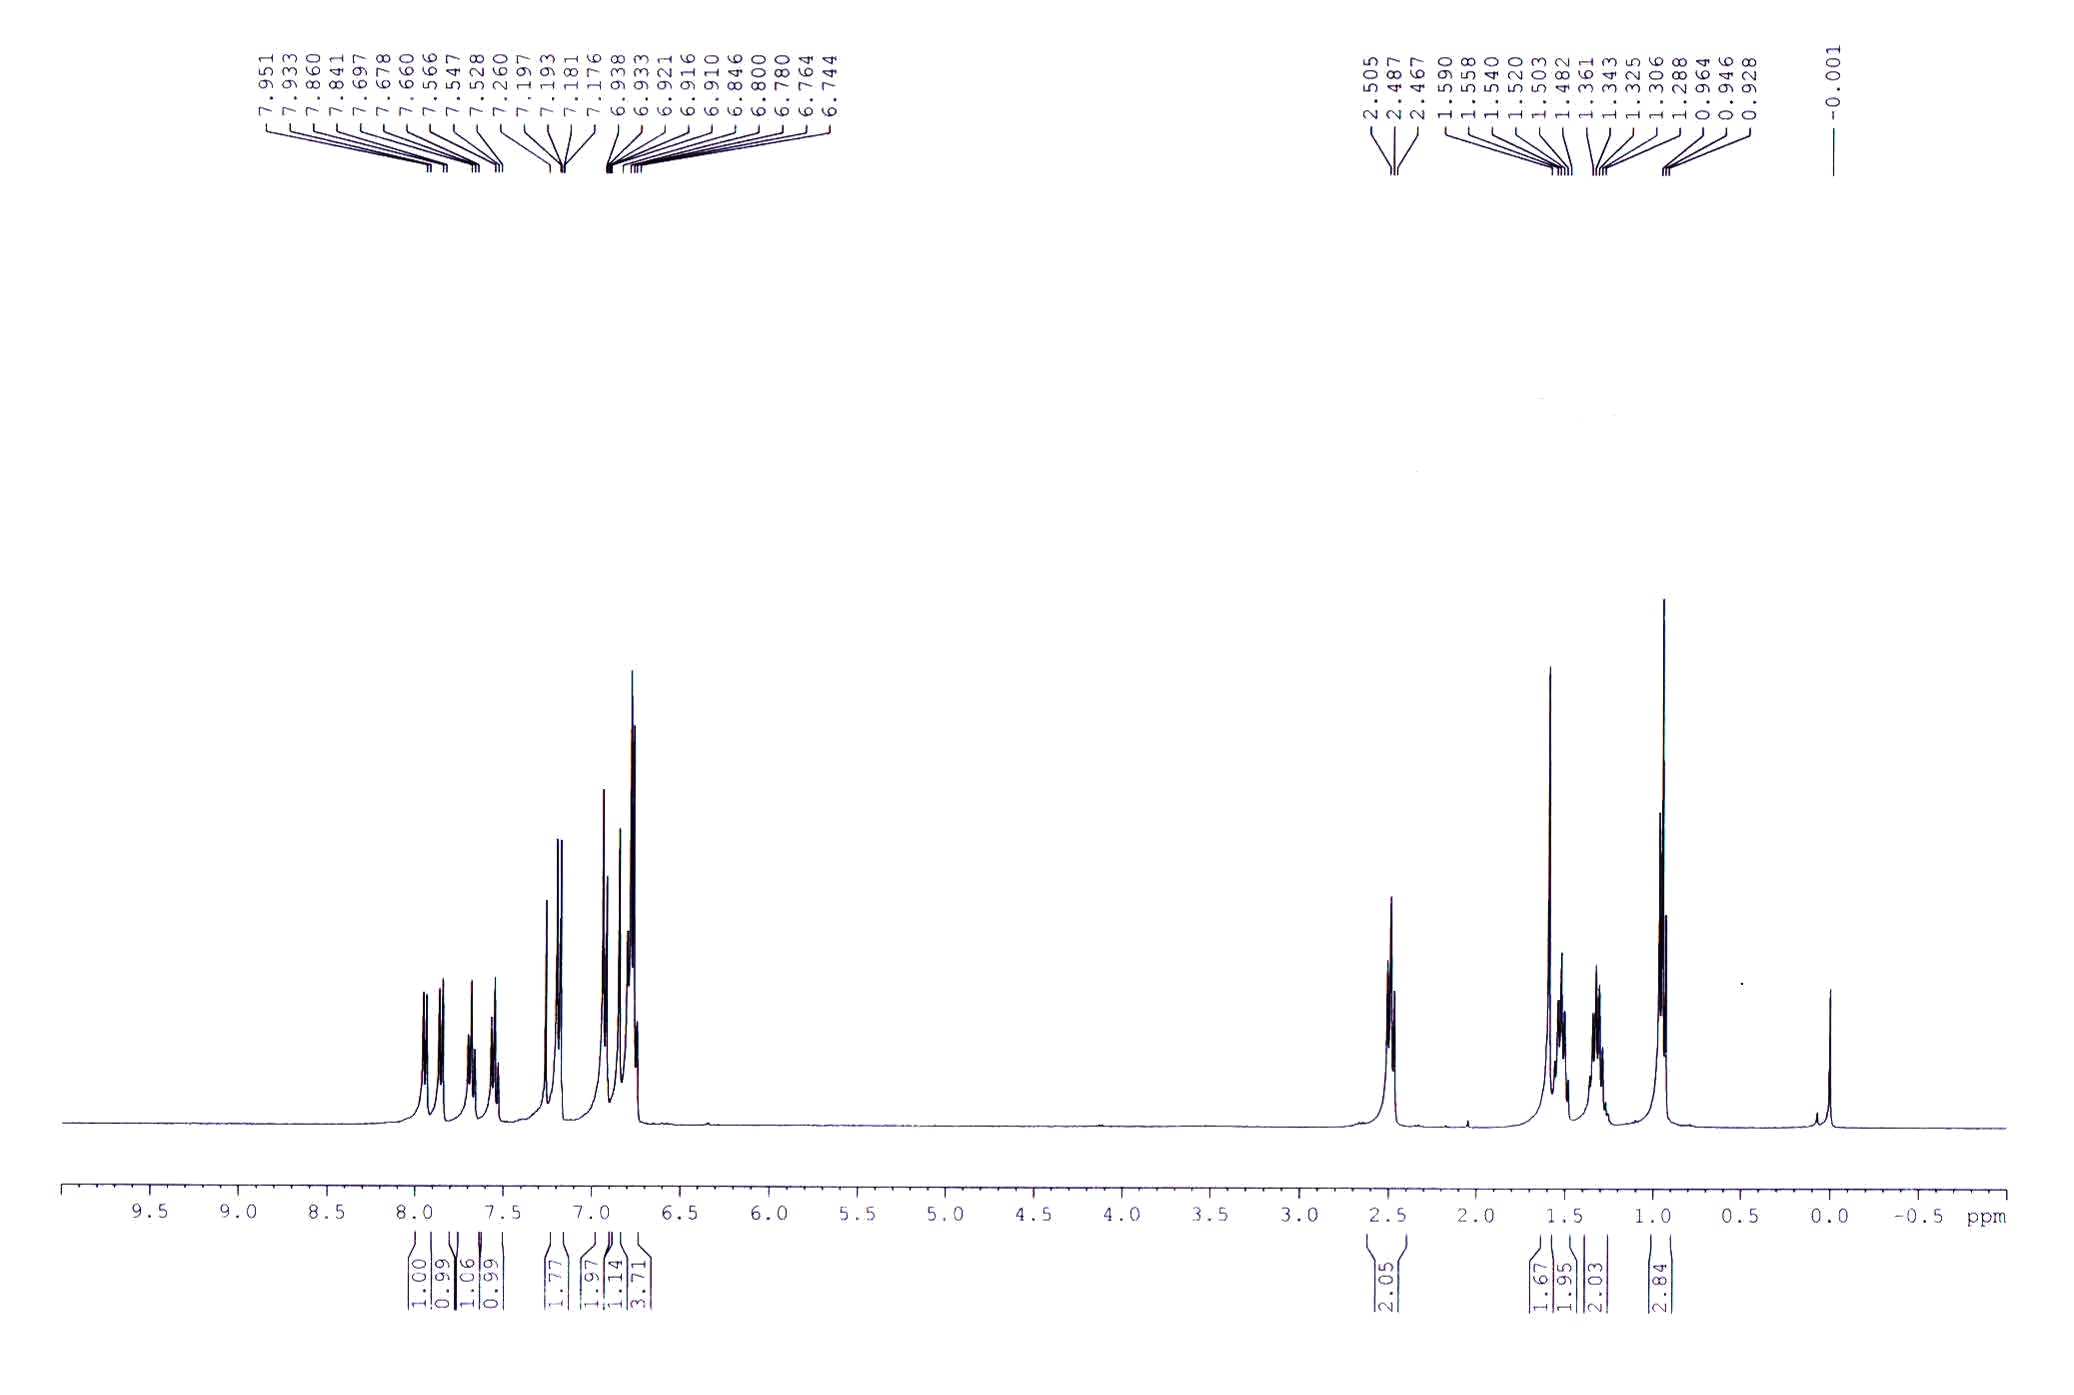


**13C NMR of (Z)-(4-bromophenyl)-3-(4-butylbenzylidene) isoindolin-1-one (3m):**

**1H NMR of (Z)-2-(4-bromophenyl)-3-(4-pentylbenzylidene) isoindolin-1-one (3n):**


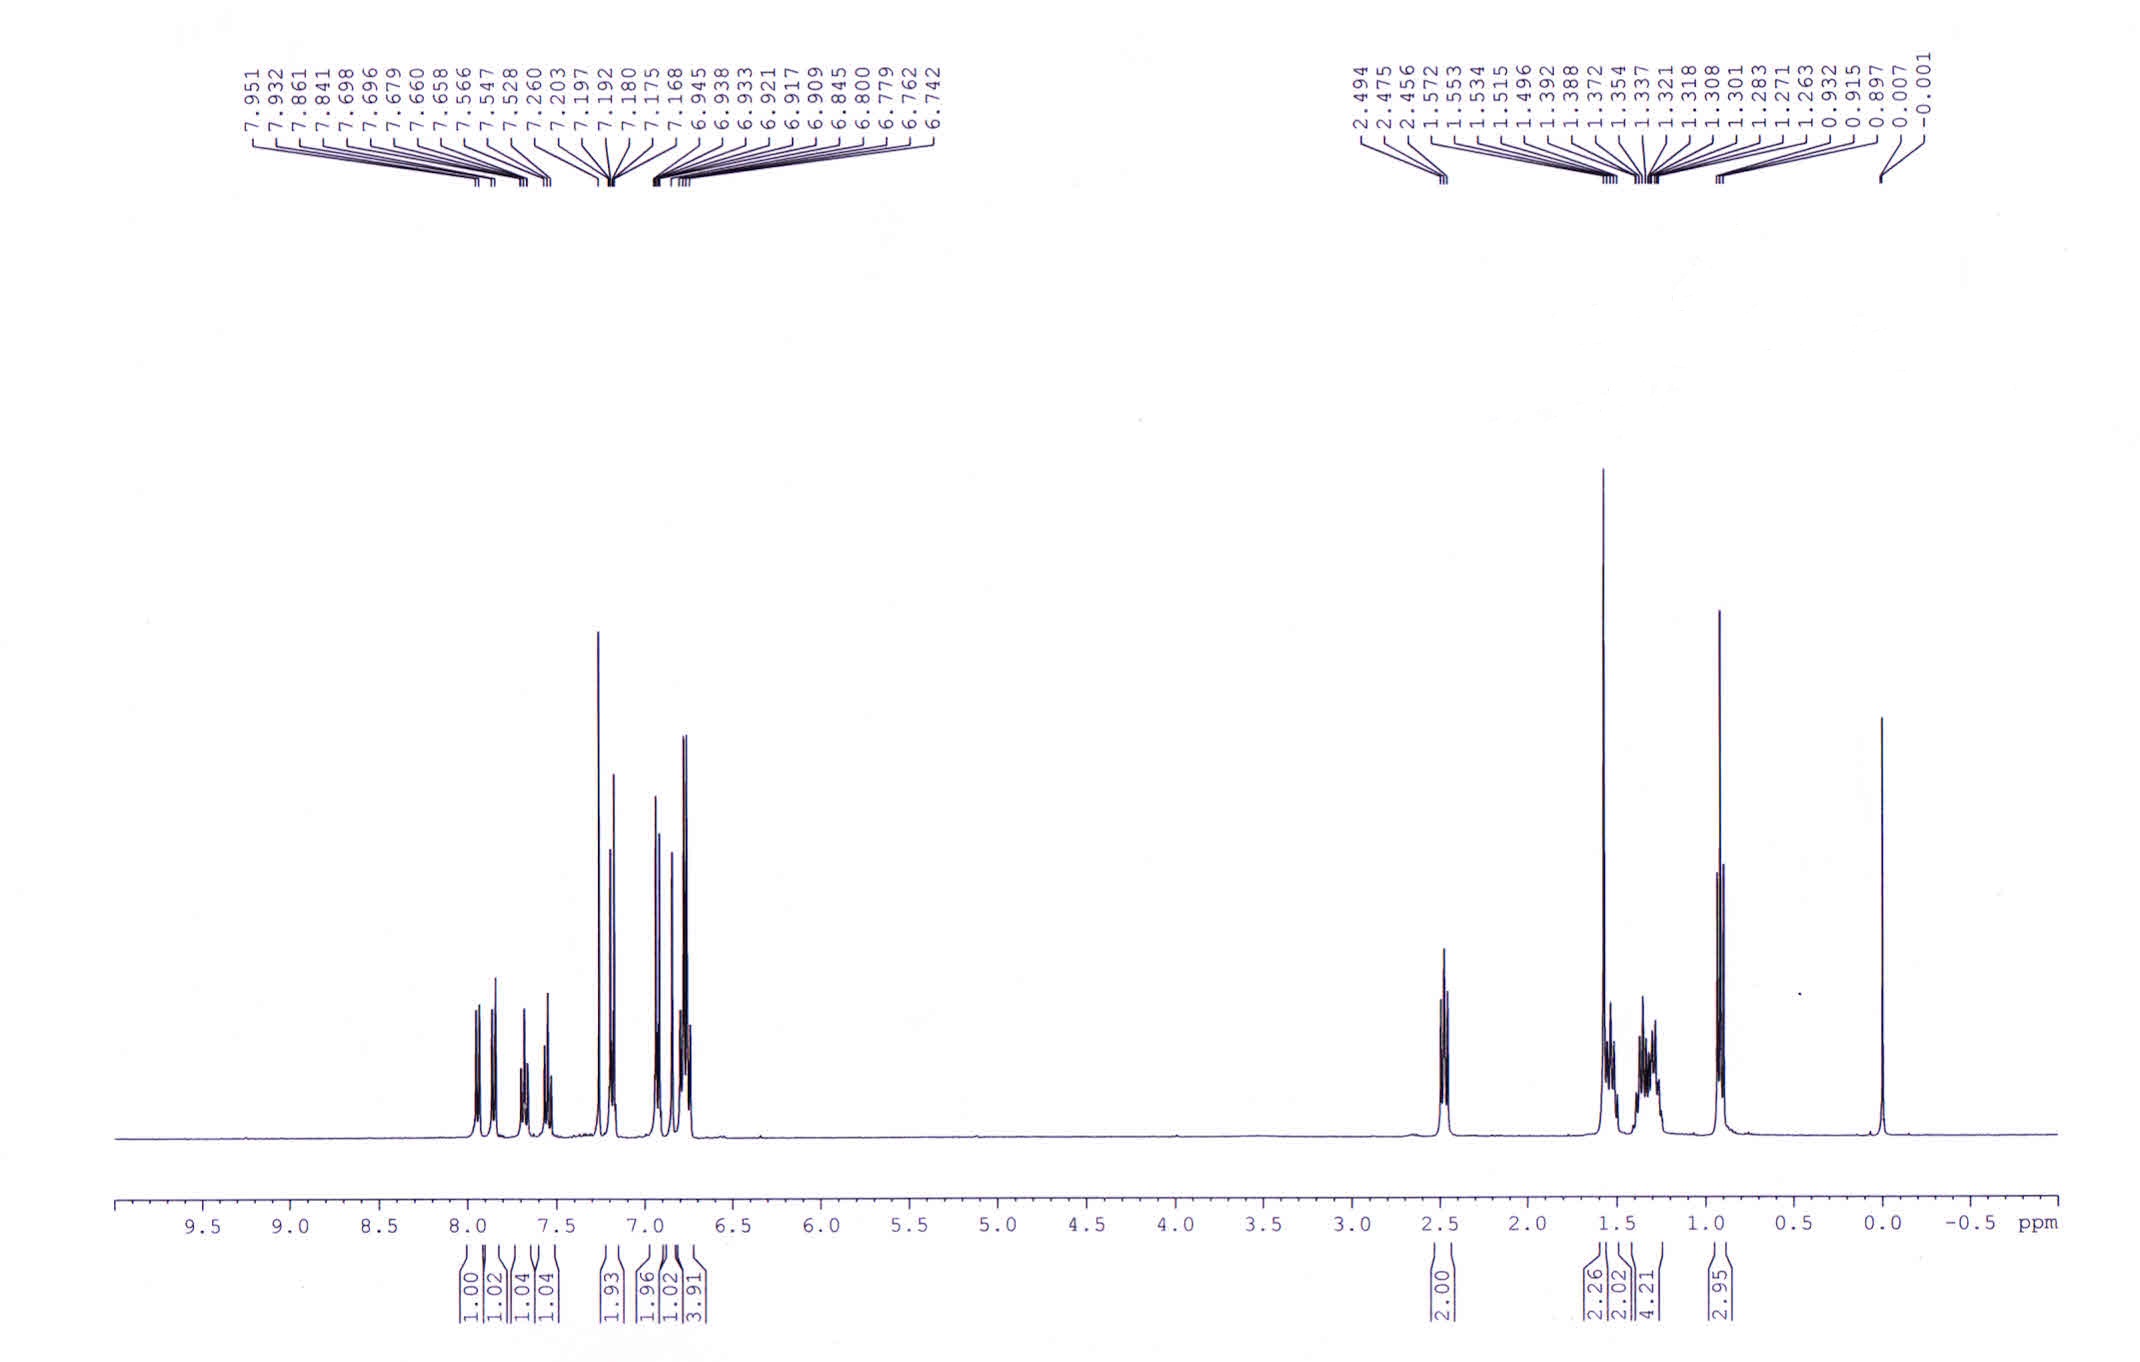


**13C NMR of (Z)-2-(4-bromophenyl)-3-(4-pentylbenzylidene) isoindolin-1-one (3n):**

**1H NMR of (Z)-2-(4-chlorophenyl)-3-(4-pentylbenzylidene) isoindolin-1-one (3o):**


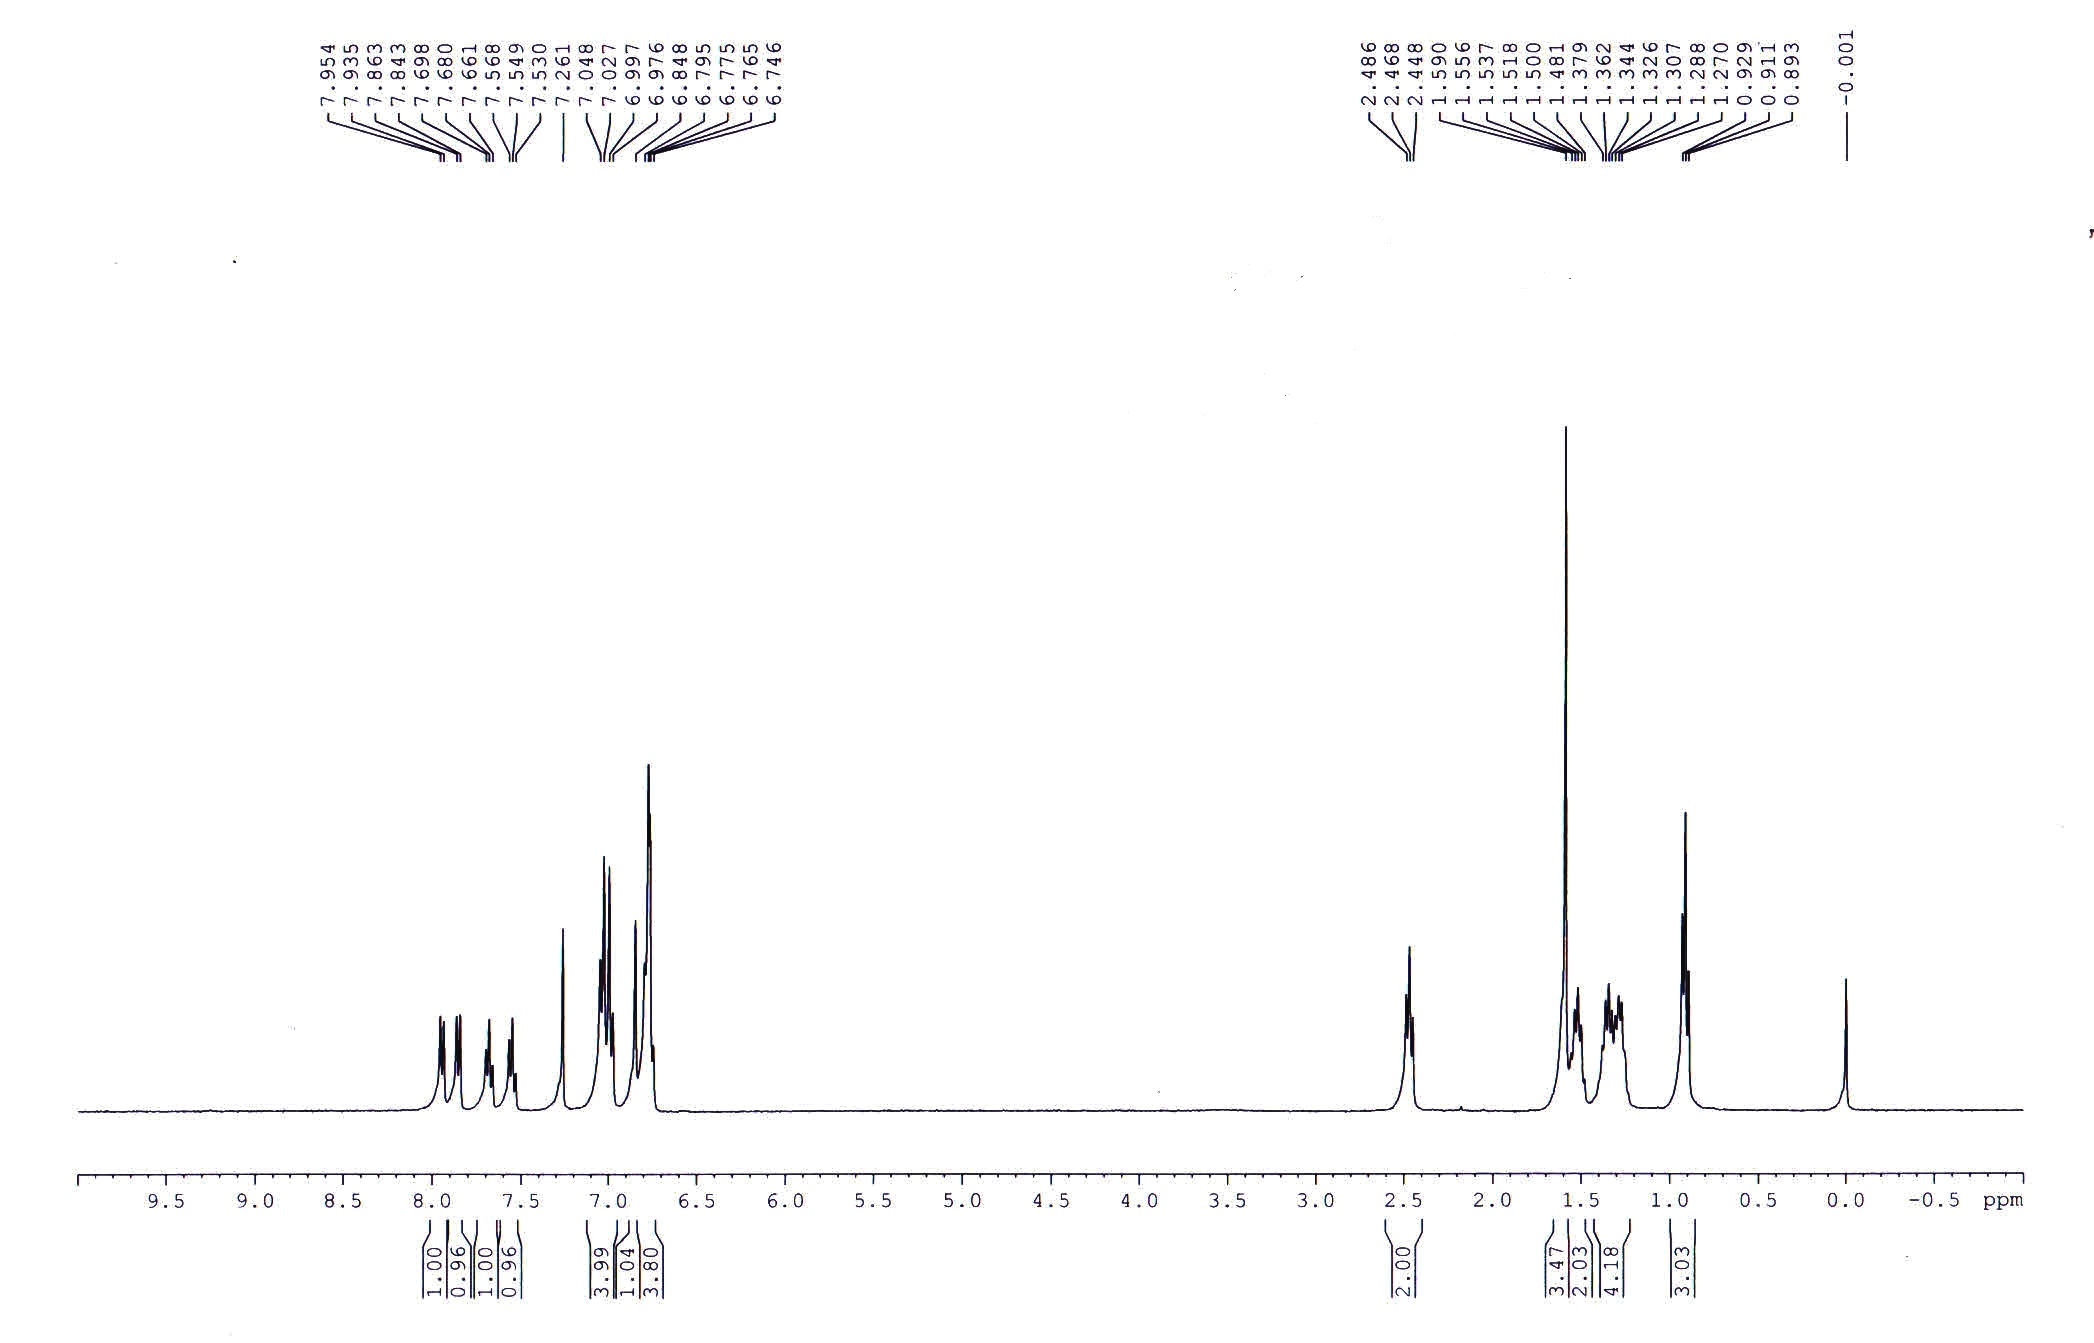


**13C NMR of (Z)-2-(4-chlorophenyl)-3-(4-pentylbenzylidene) isoindolin-1-one (3o):**

**1H NMR of (Z)-3-(4-pentylbenzylidene)-2-(m-tolyl) isoindolin-1-one (3p):**


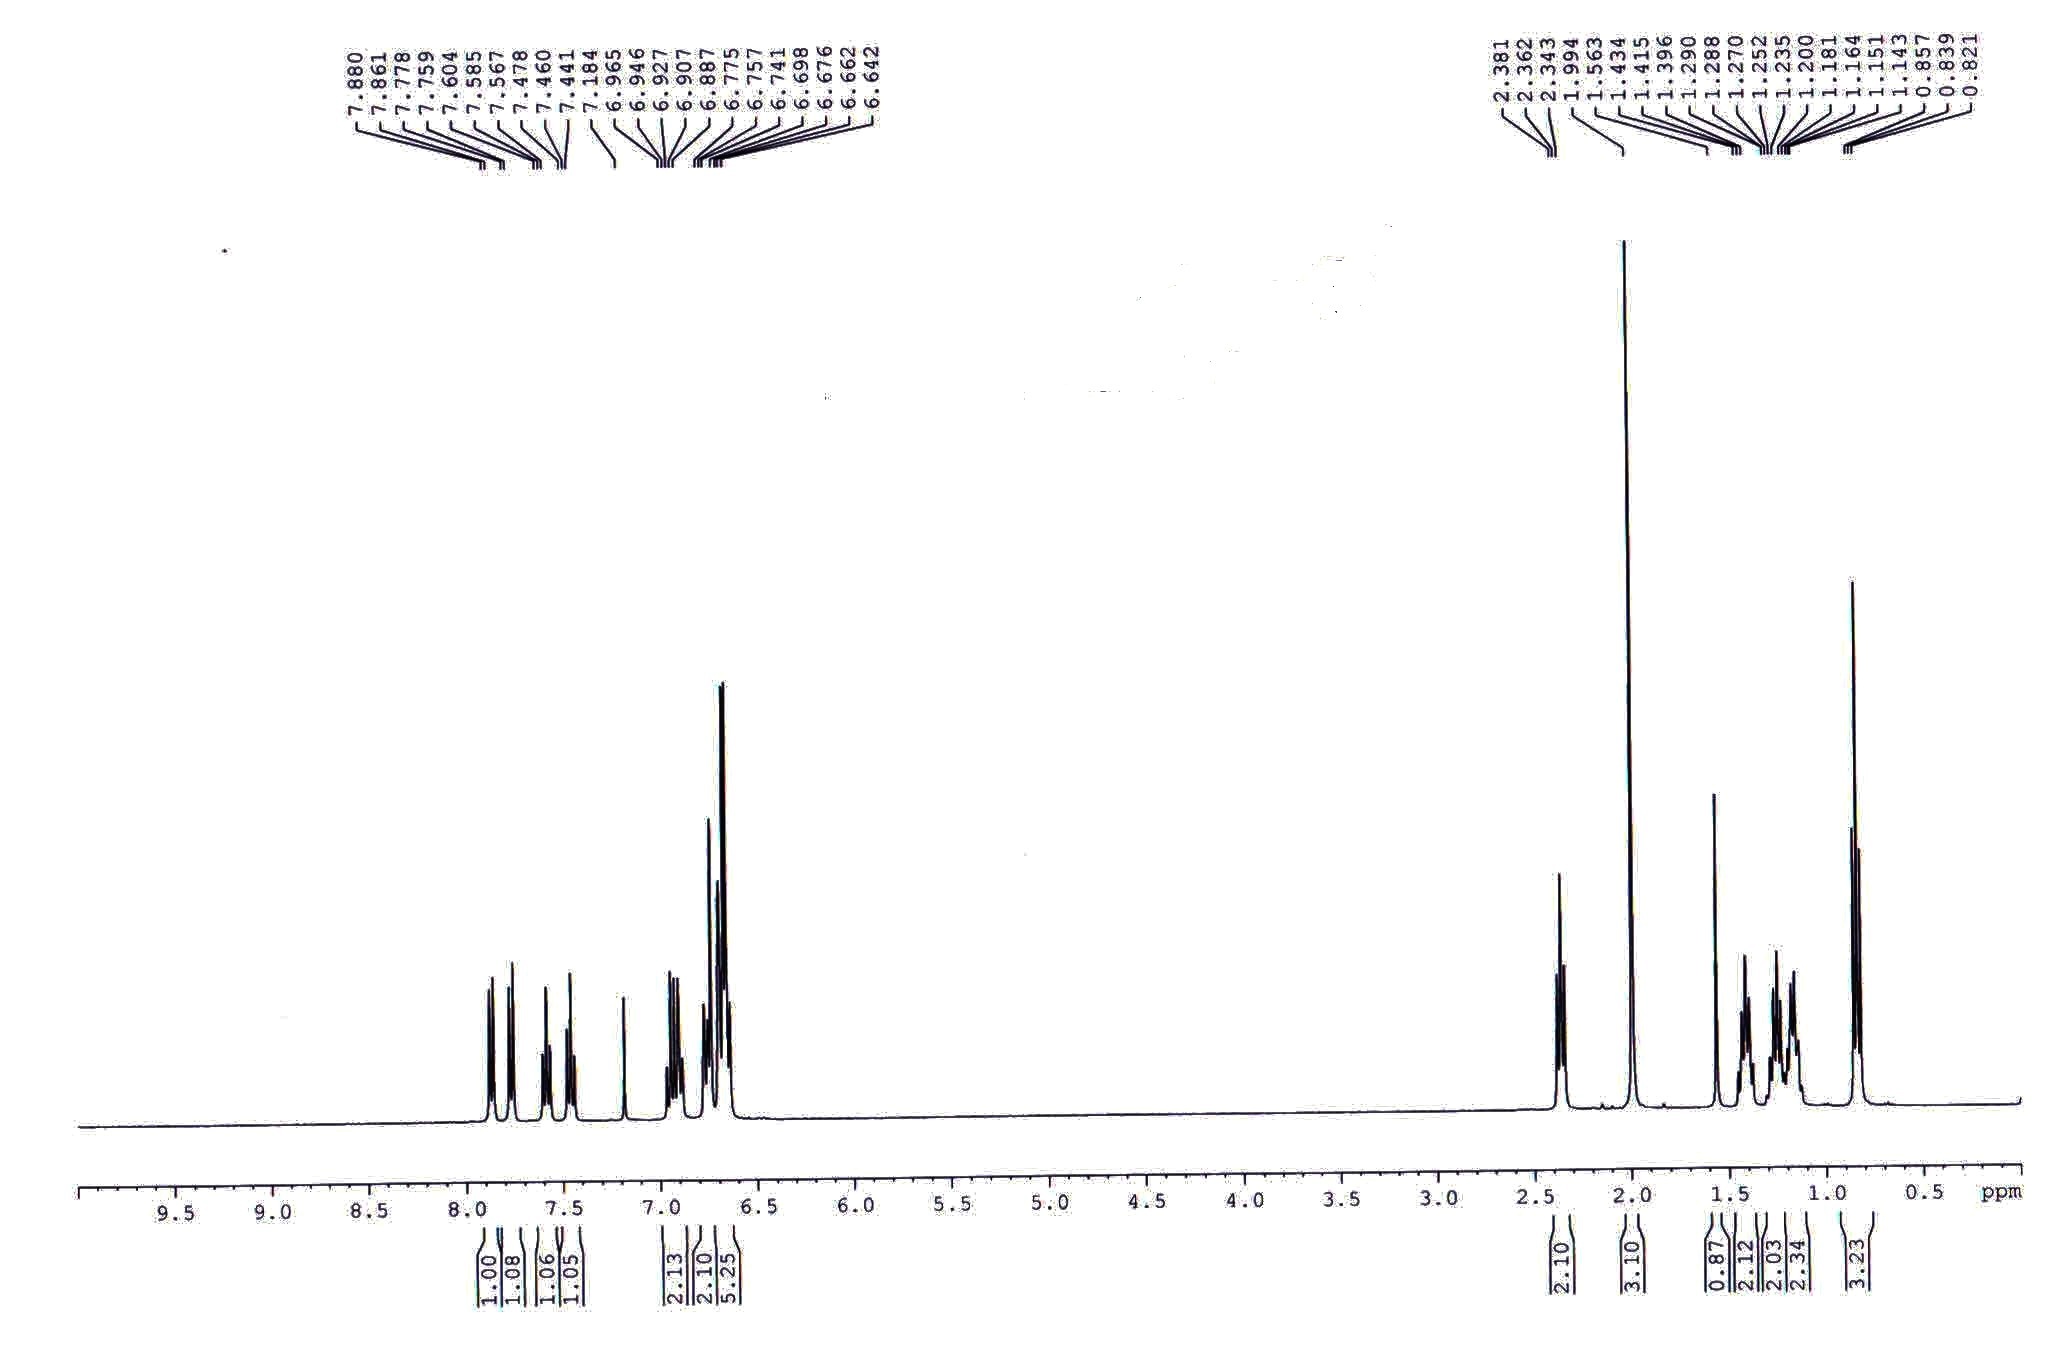


**13C NMR of (Z)-3-(4-pentylbenzylidene)-2-(m-tolyl) isoindolin-1-one (3p):**

**1H NMR of (Z)-3-(4-pentylbenzylidene)-2-phenylisoindolin-1-one (3q):**


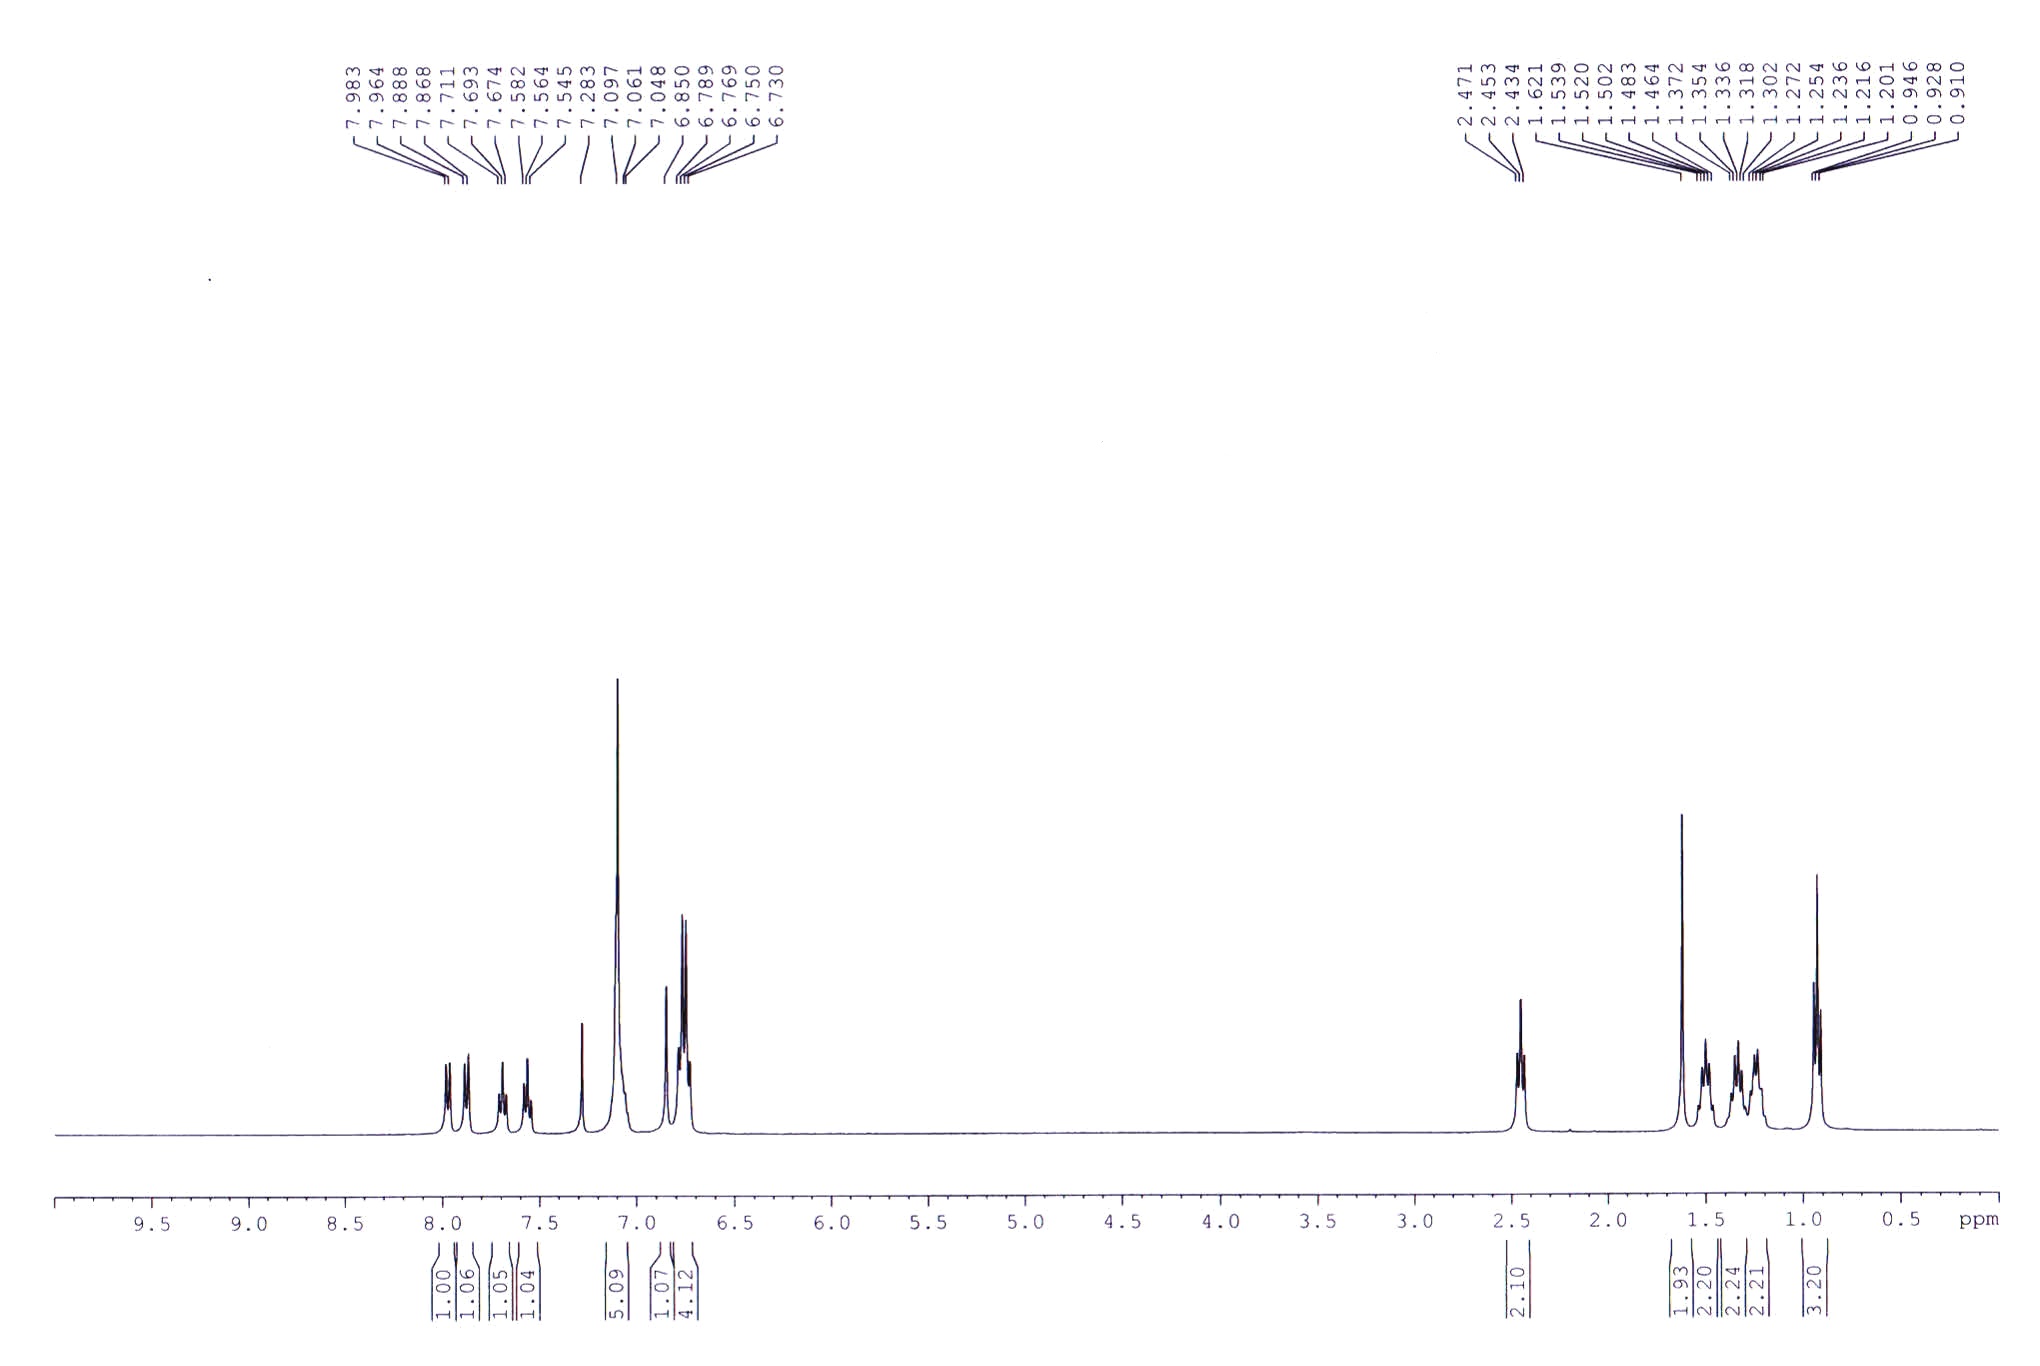


**13C NMR of (Z)-3-(4-pentylbenzylidene)-2-phenylisoindolin-1-one (3q):**

**1H NMR of (Z)-3-butylidene-2-phenylisoindolin-1-one (3r):**


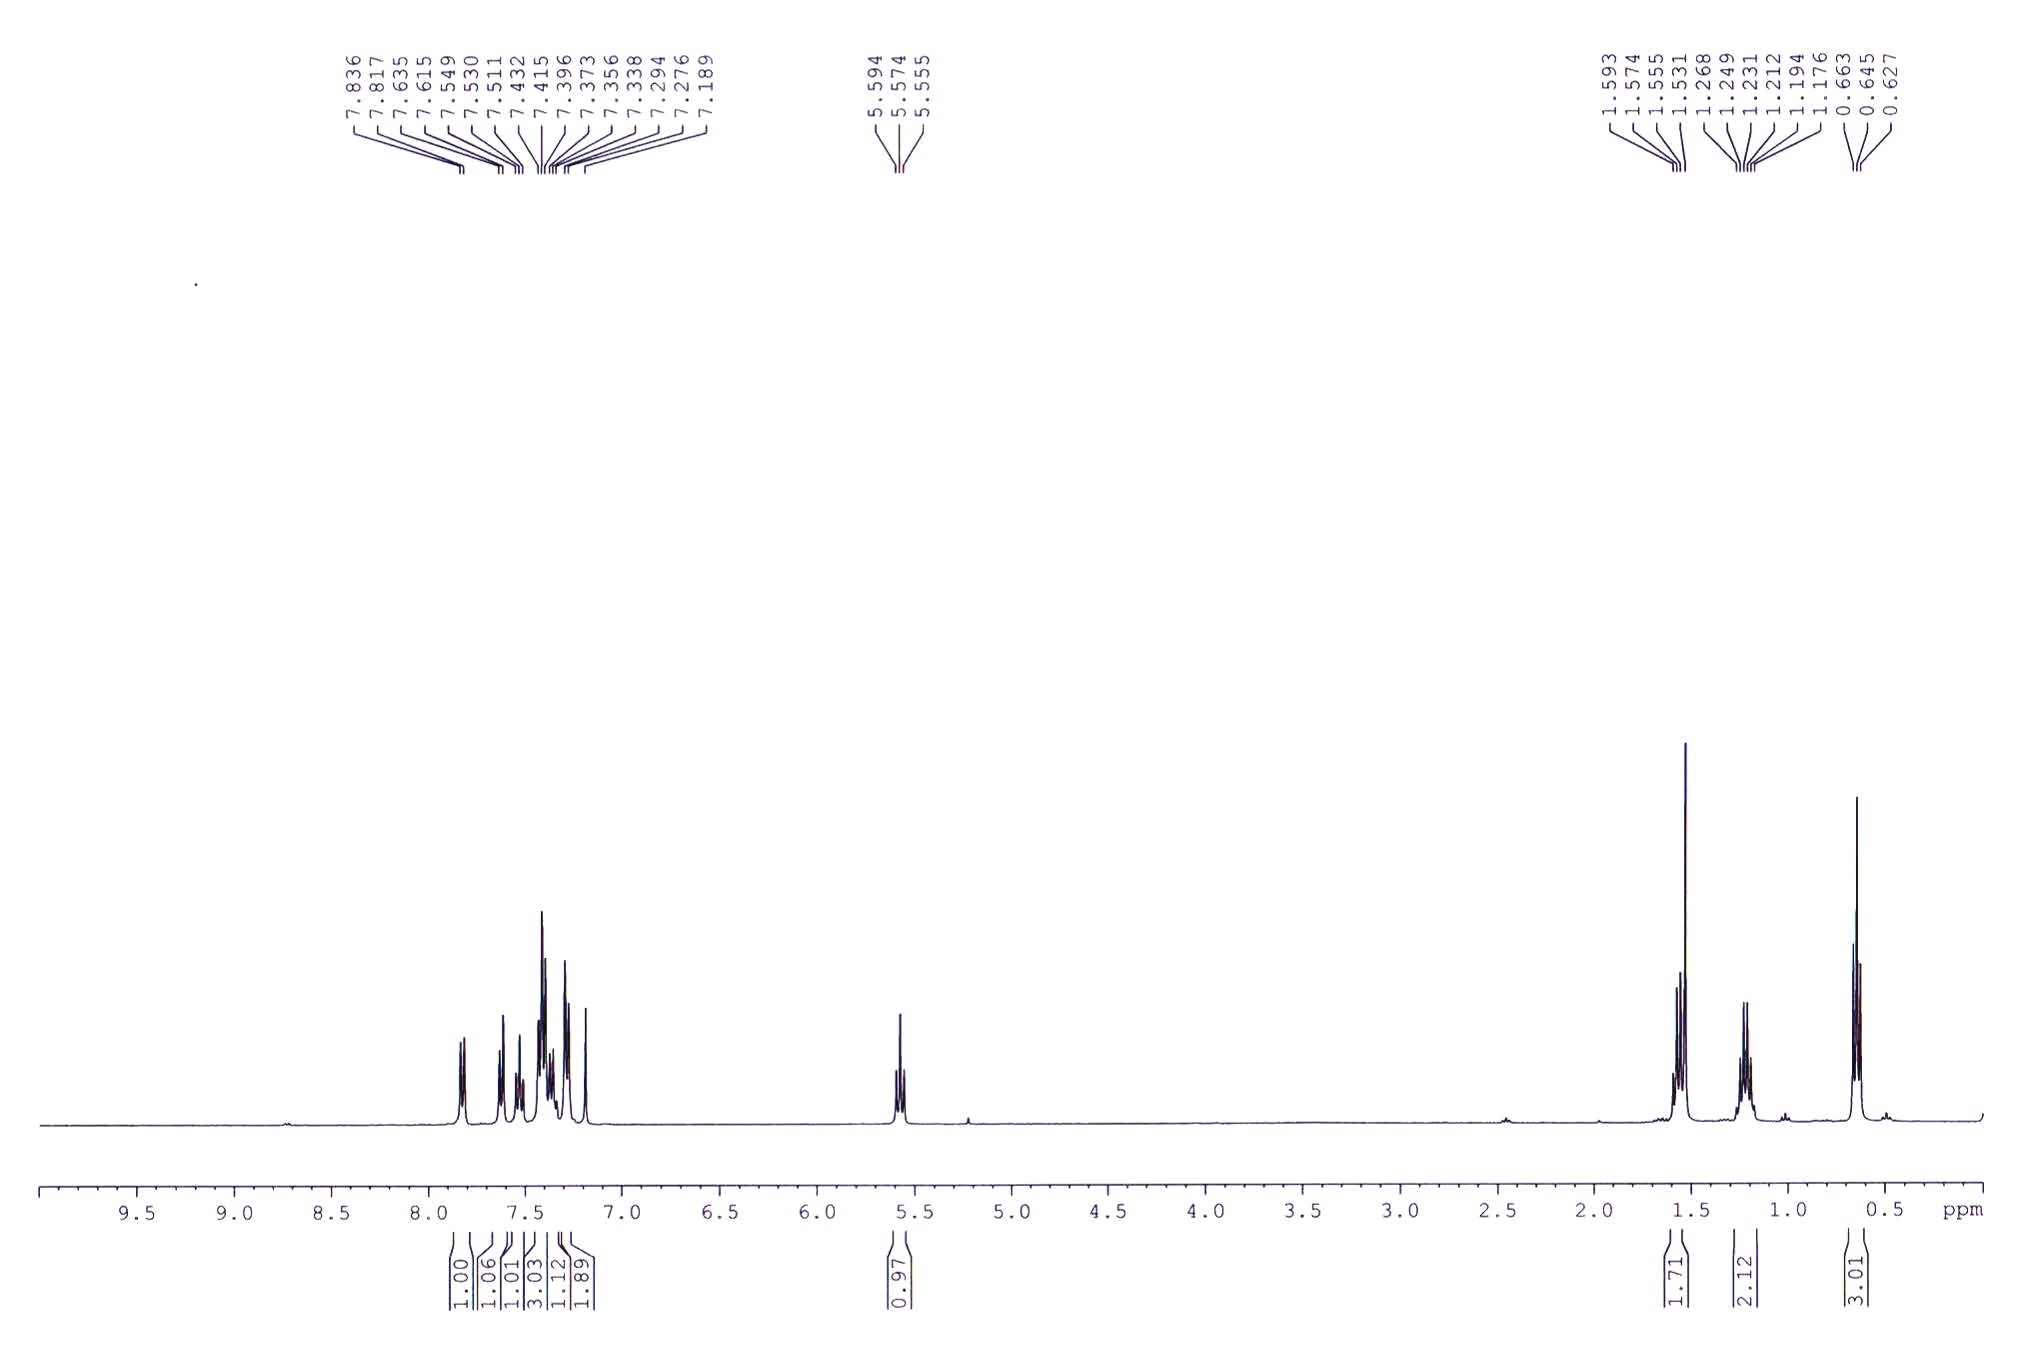


**13C NMR of (Z)-3-butylidene-2-phenylisoindolin-1-one (3r):**

**1H NMR of (Z)-2-(4-bromophenyl)-3-butylidene isoindolin-1-one (3s):**


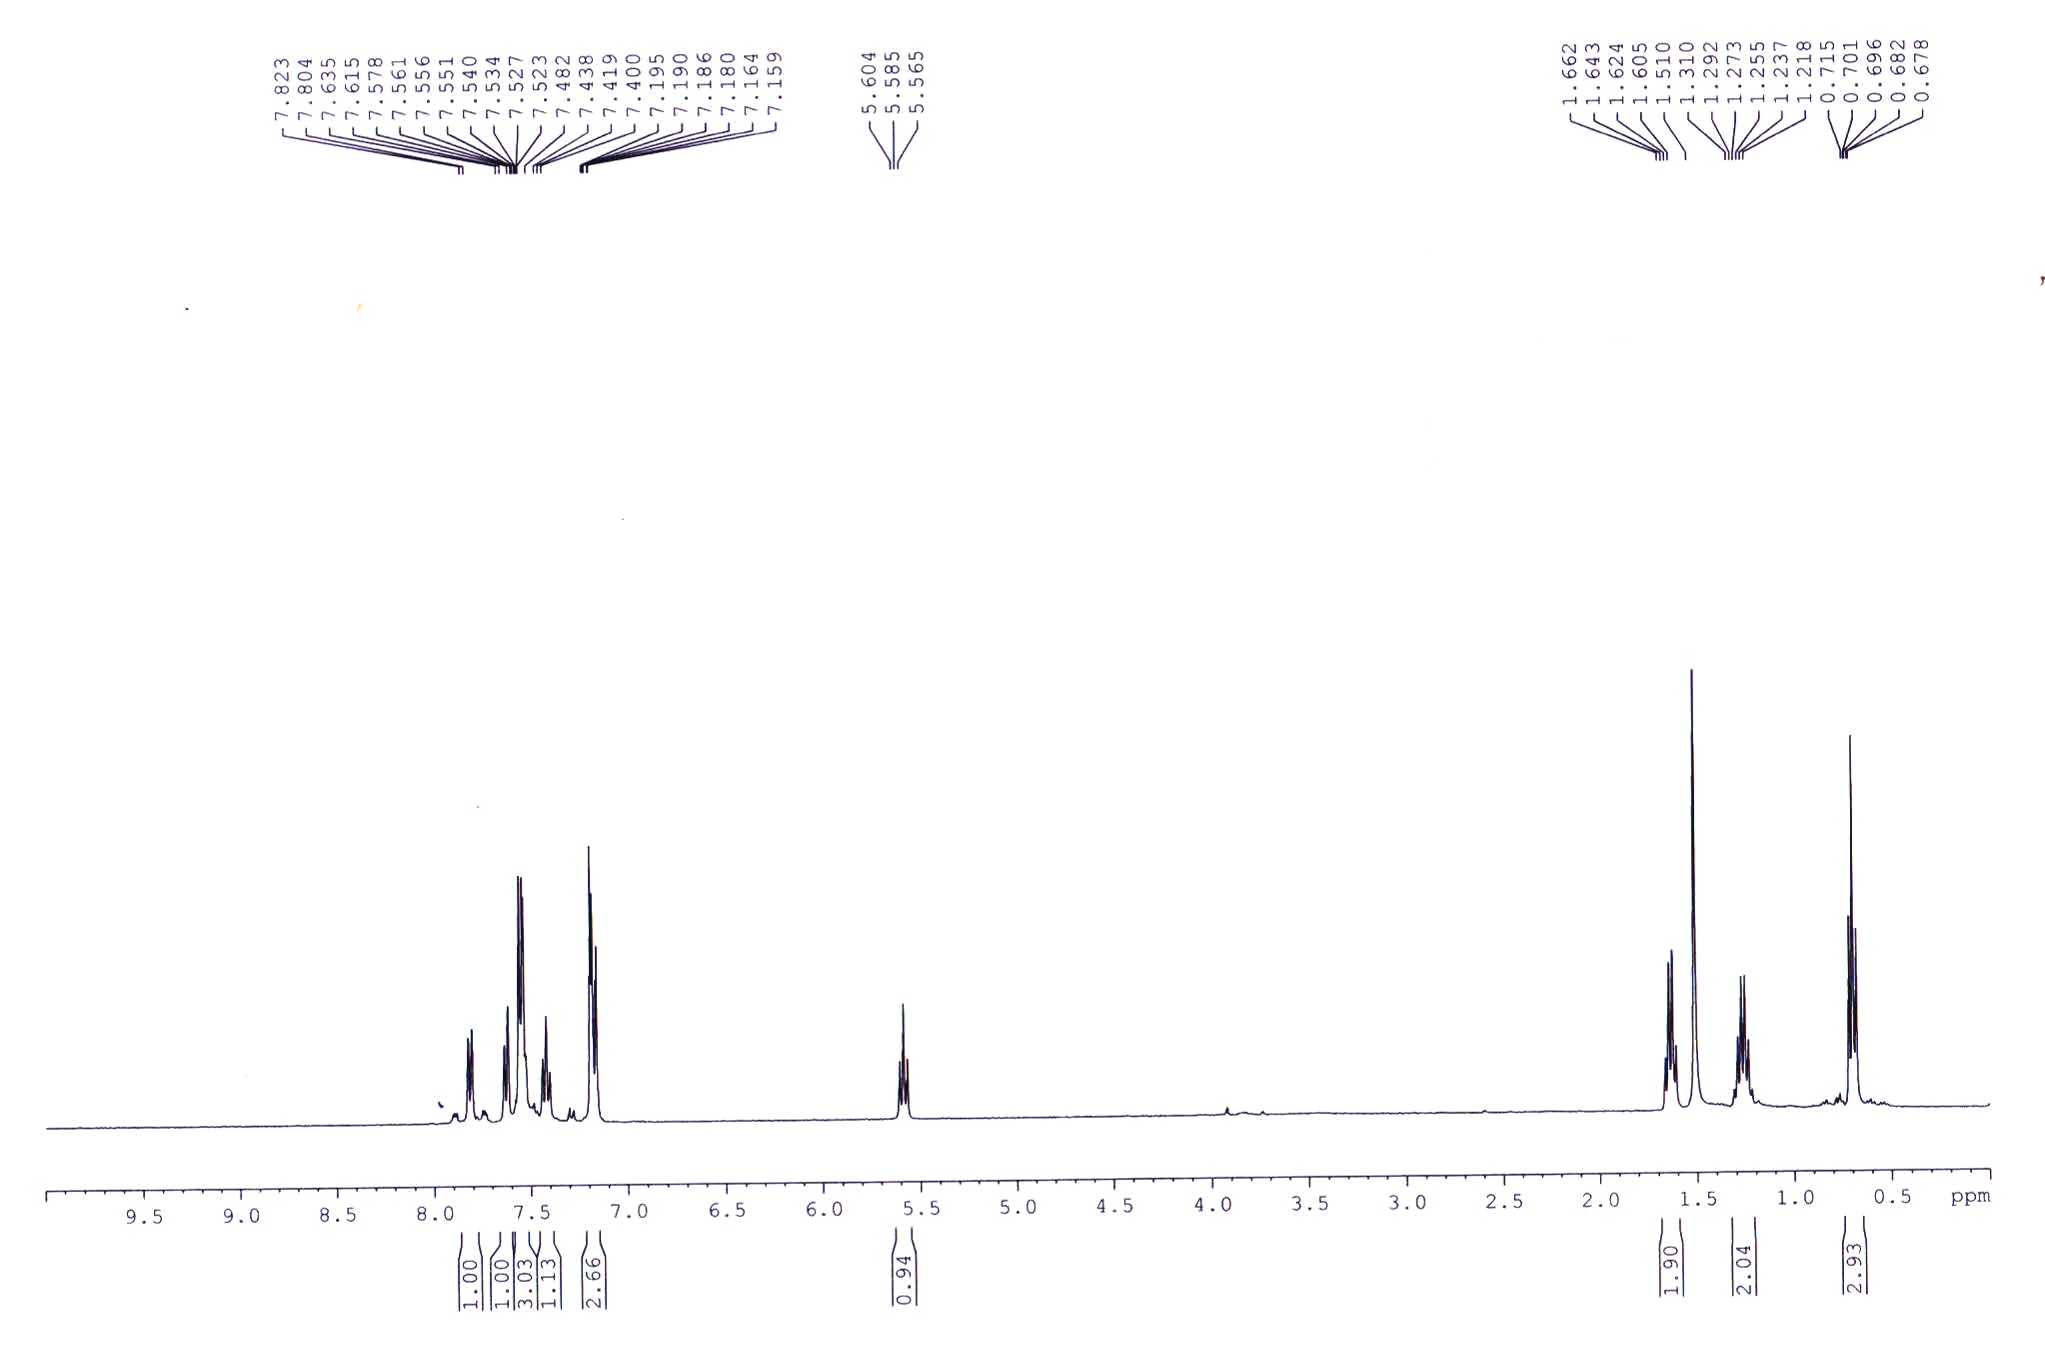


**13C NMR of (Z)-2-(4-bromophenyl)-3-butylidene isoindolin-1-one (3s):**

**1H NMR of (Z)-3-butylidene-2-(4-chlorophenyl) isoindolin-1-one (3t):**


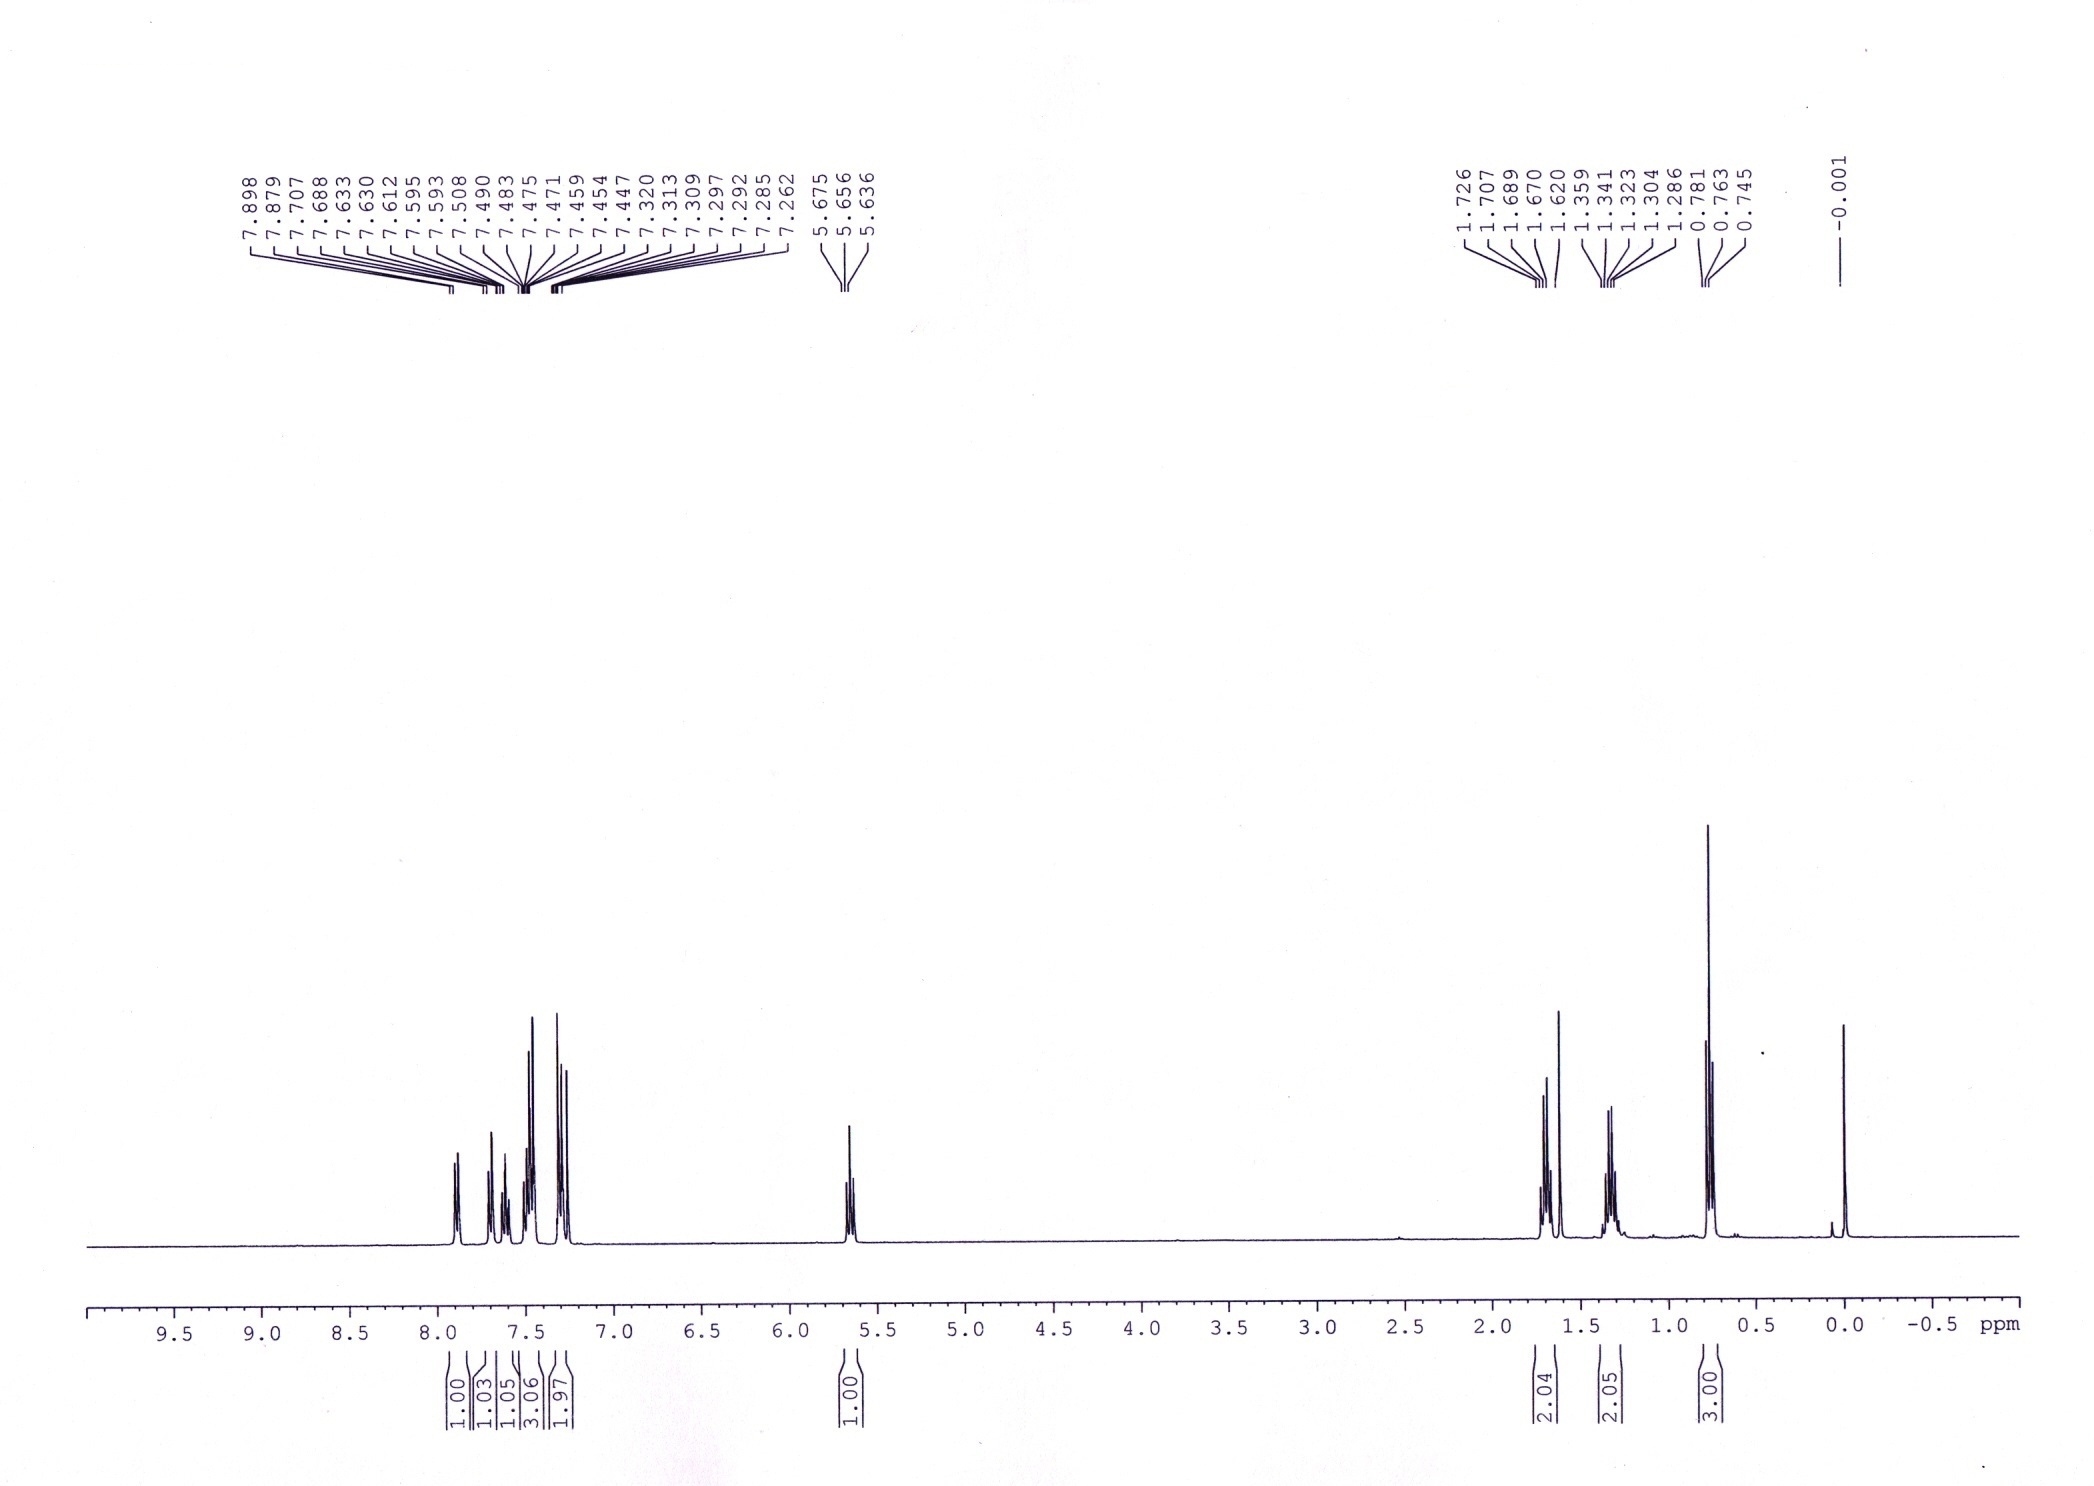


**1H NMR of (Z)-3-butylidene-2-(4-methoxyphenyl) isoindolin-1-one (3u):**

|  |
| --- |
|  |


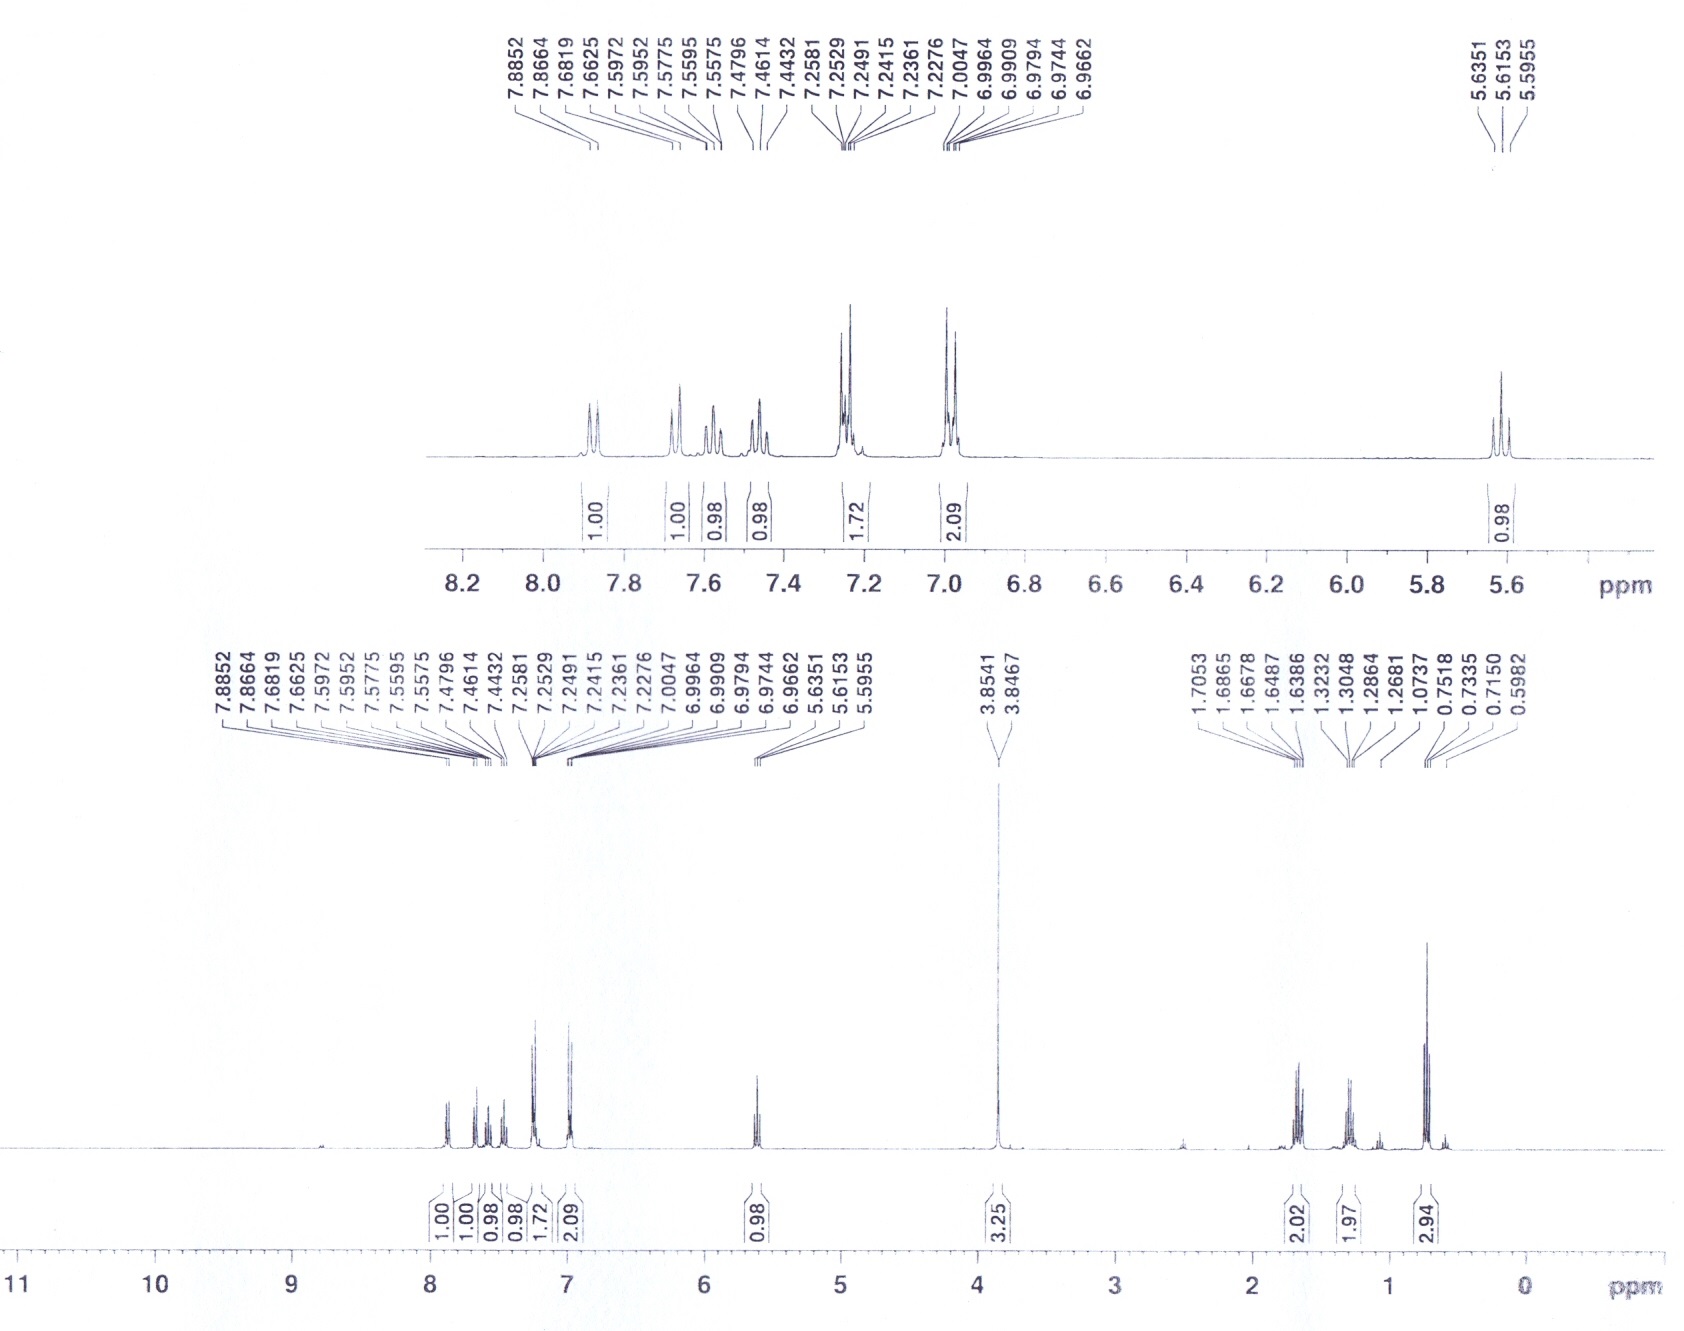


**1H NMR of (Z)-3-benzylidene-2-(2, 4-dimethylphenyl) isoindolin-1-one (3v):**


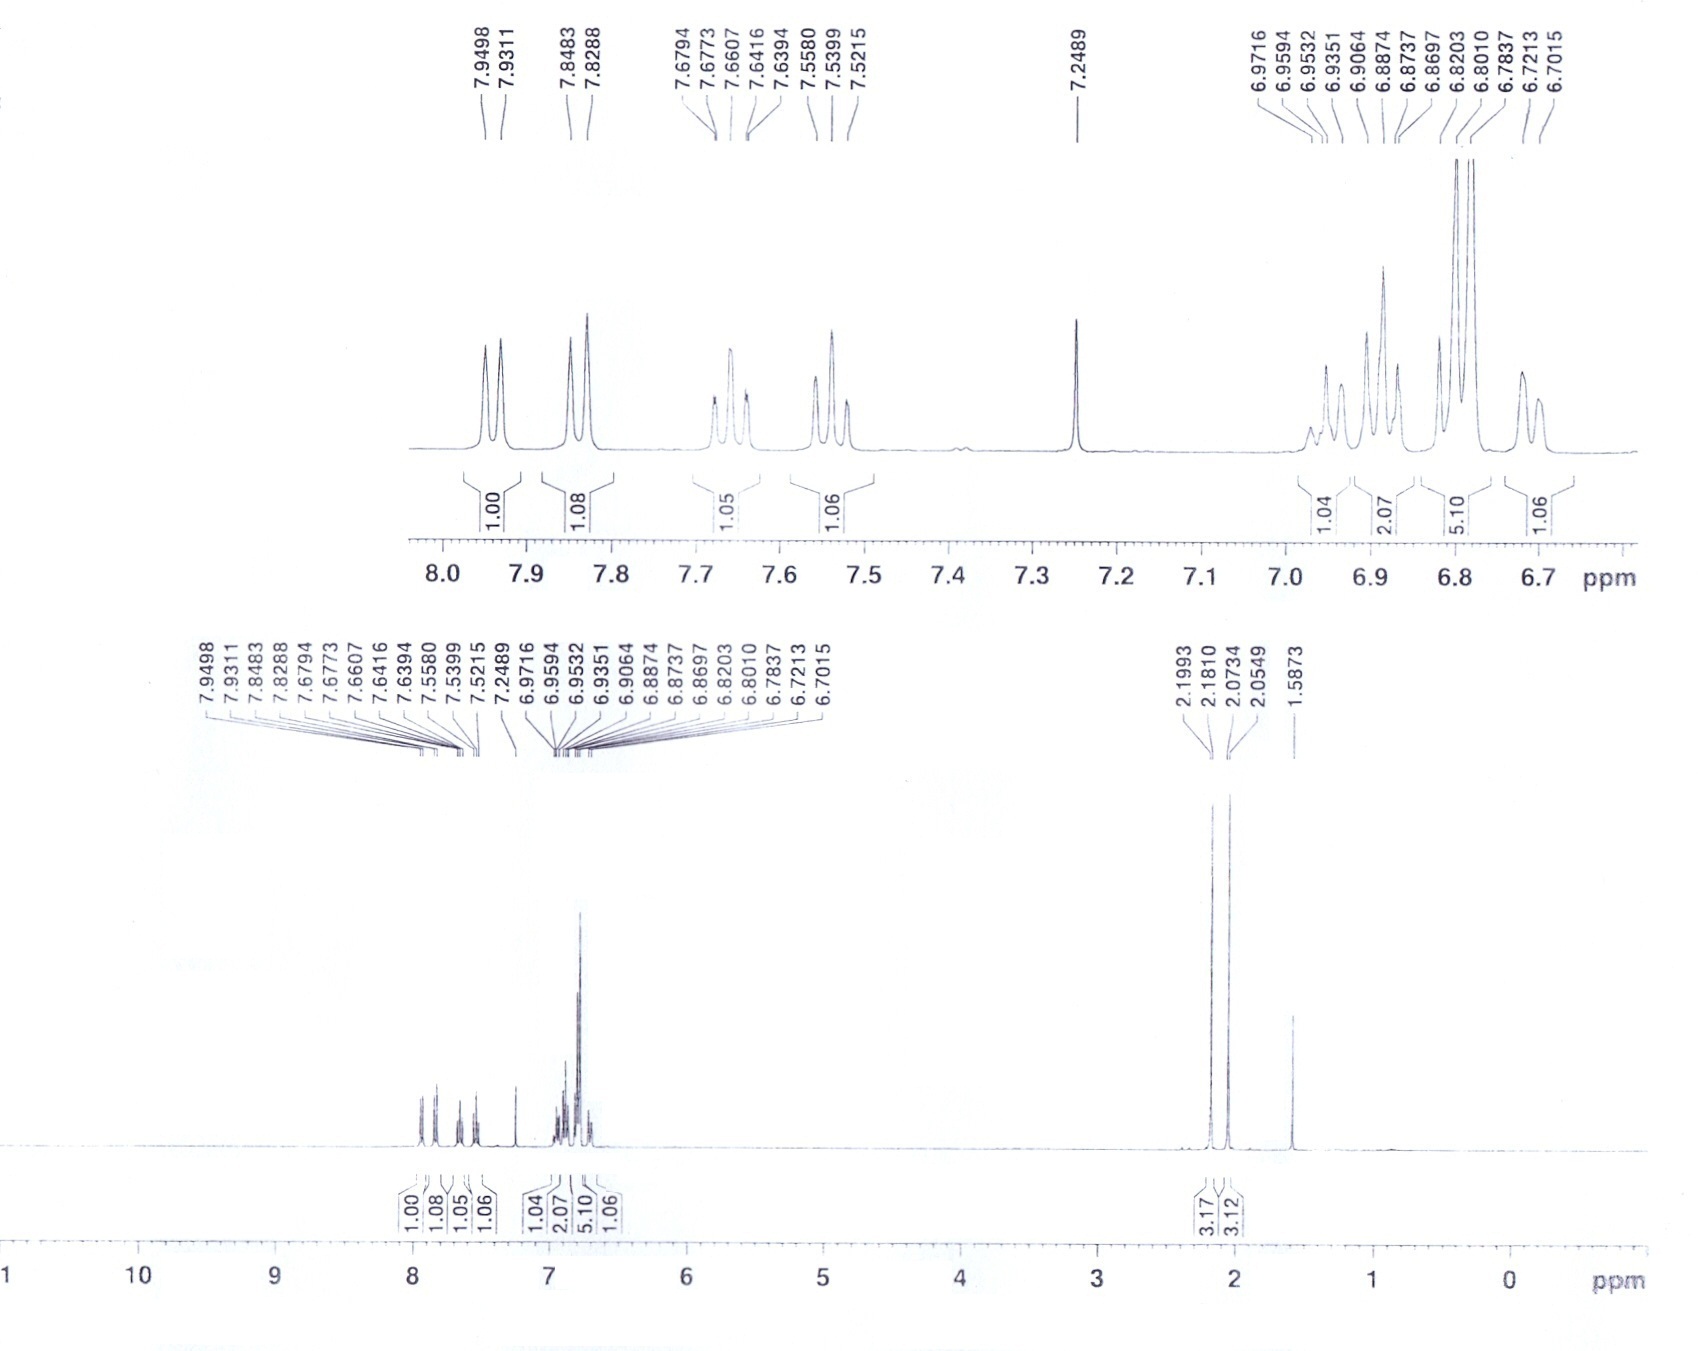


**1H NMR of (Z)-3-benzylidene-2-(3-chlorophenyl) isoindolin-1-one (3w):**


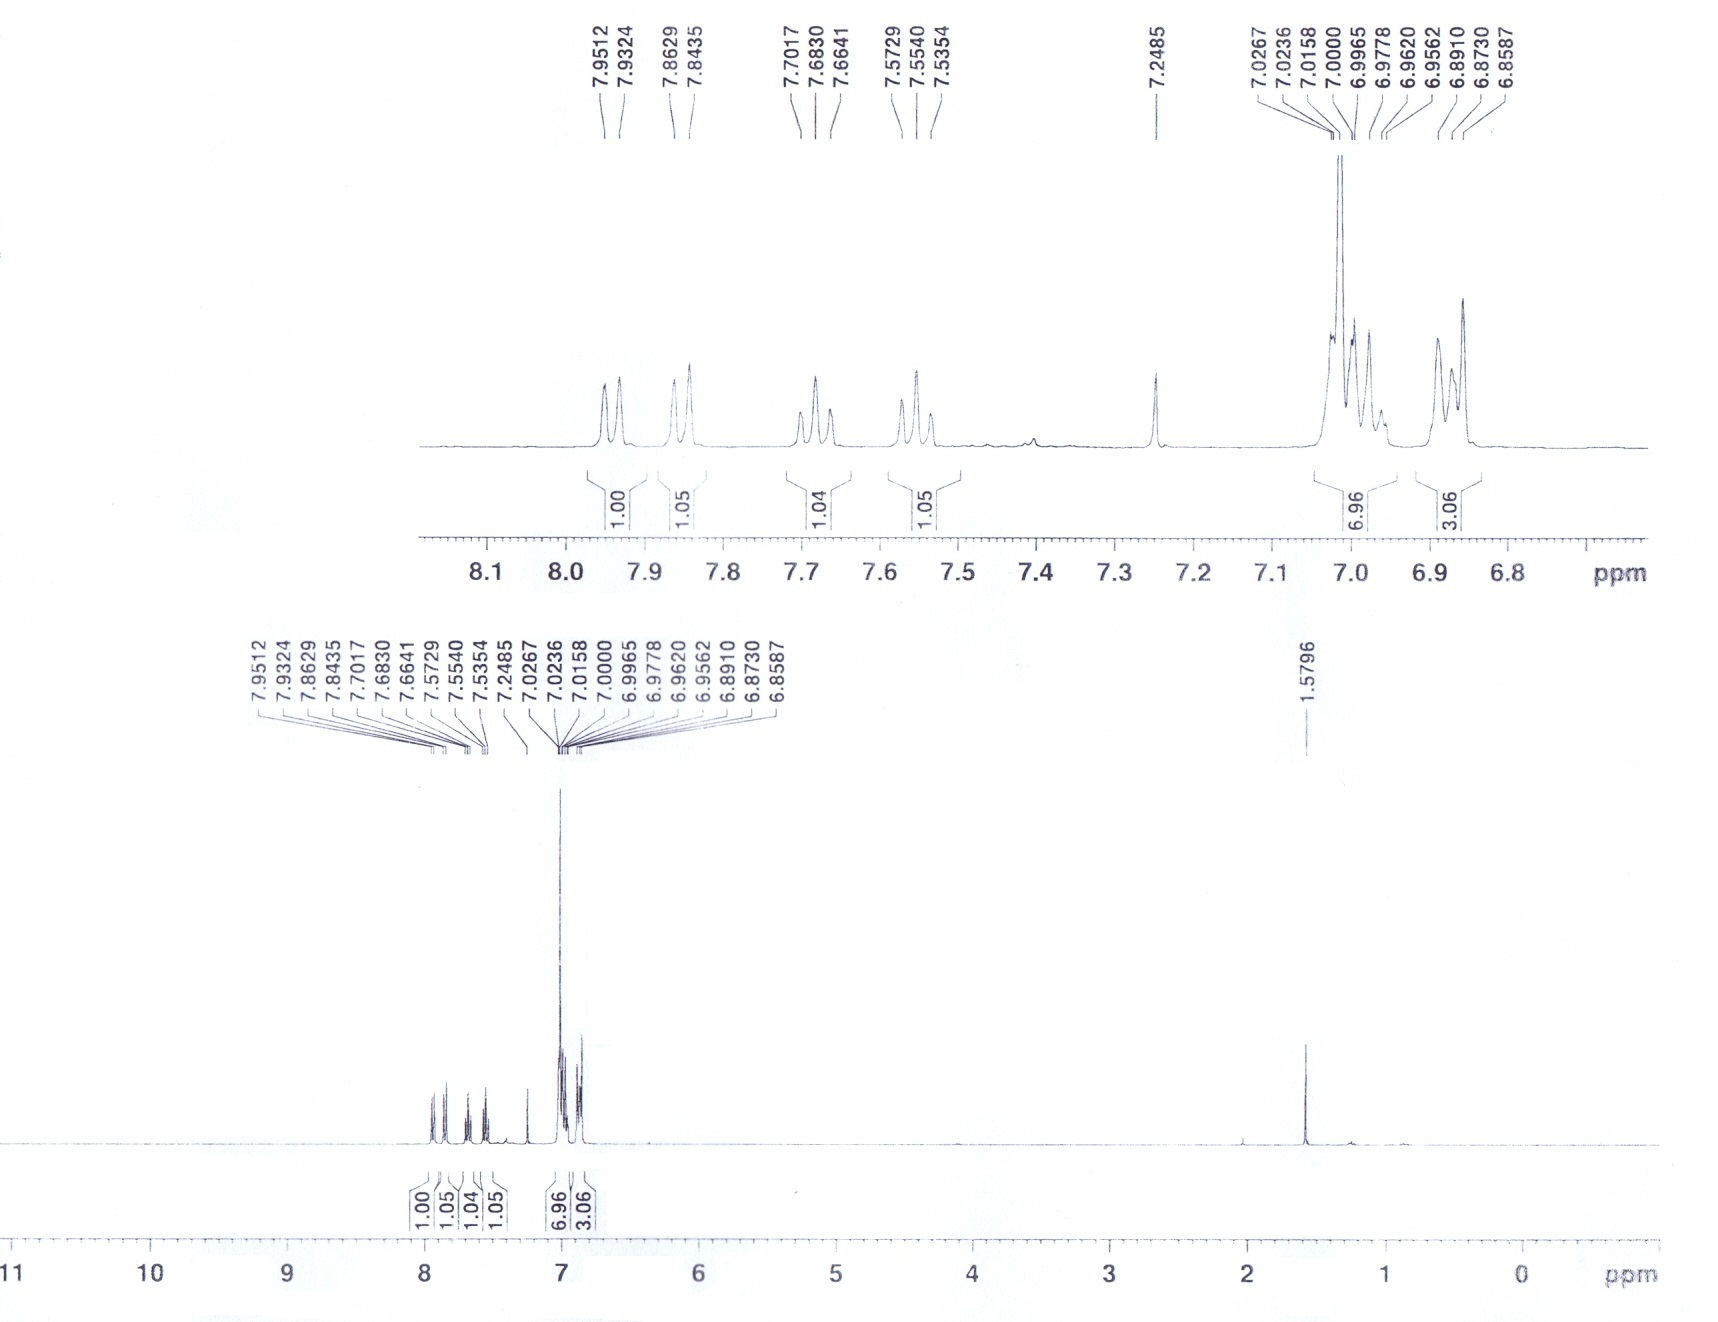


**1H NMR of (Z)-3-benzylidene-2-(4-methoxyphenyl) isoindolin-1-one (3x):**


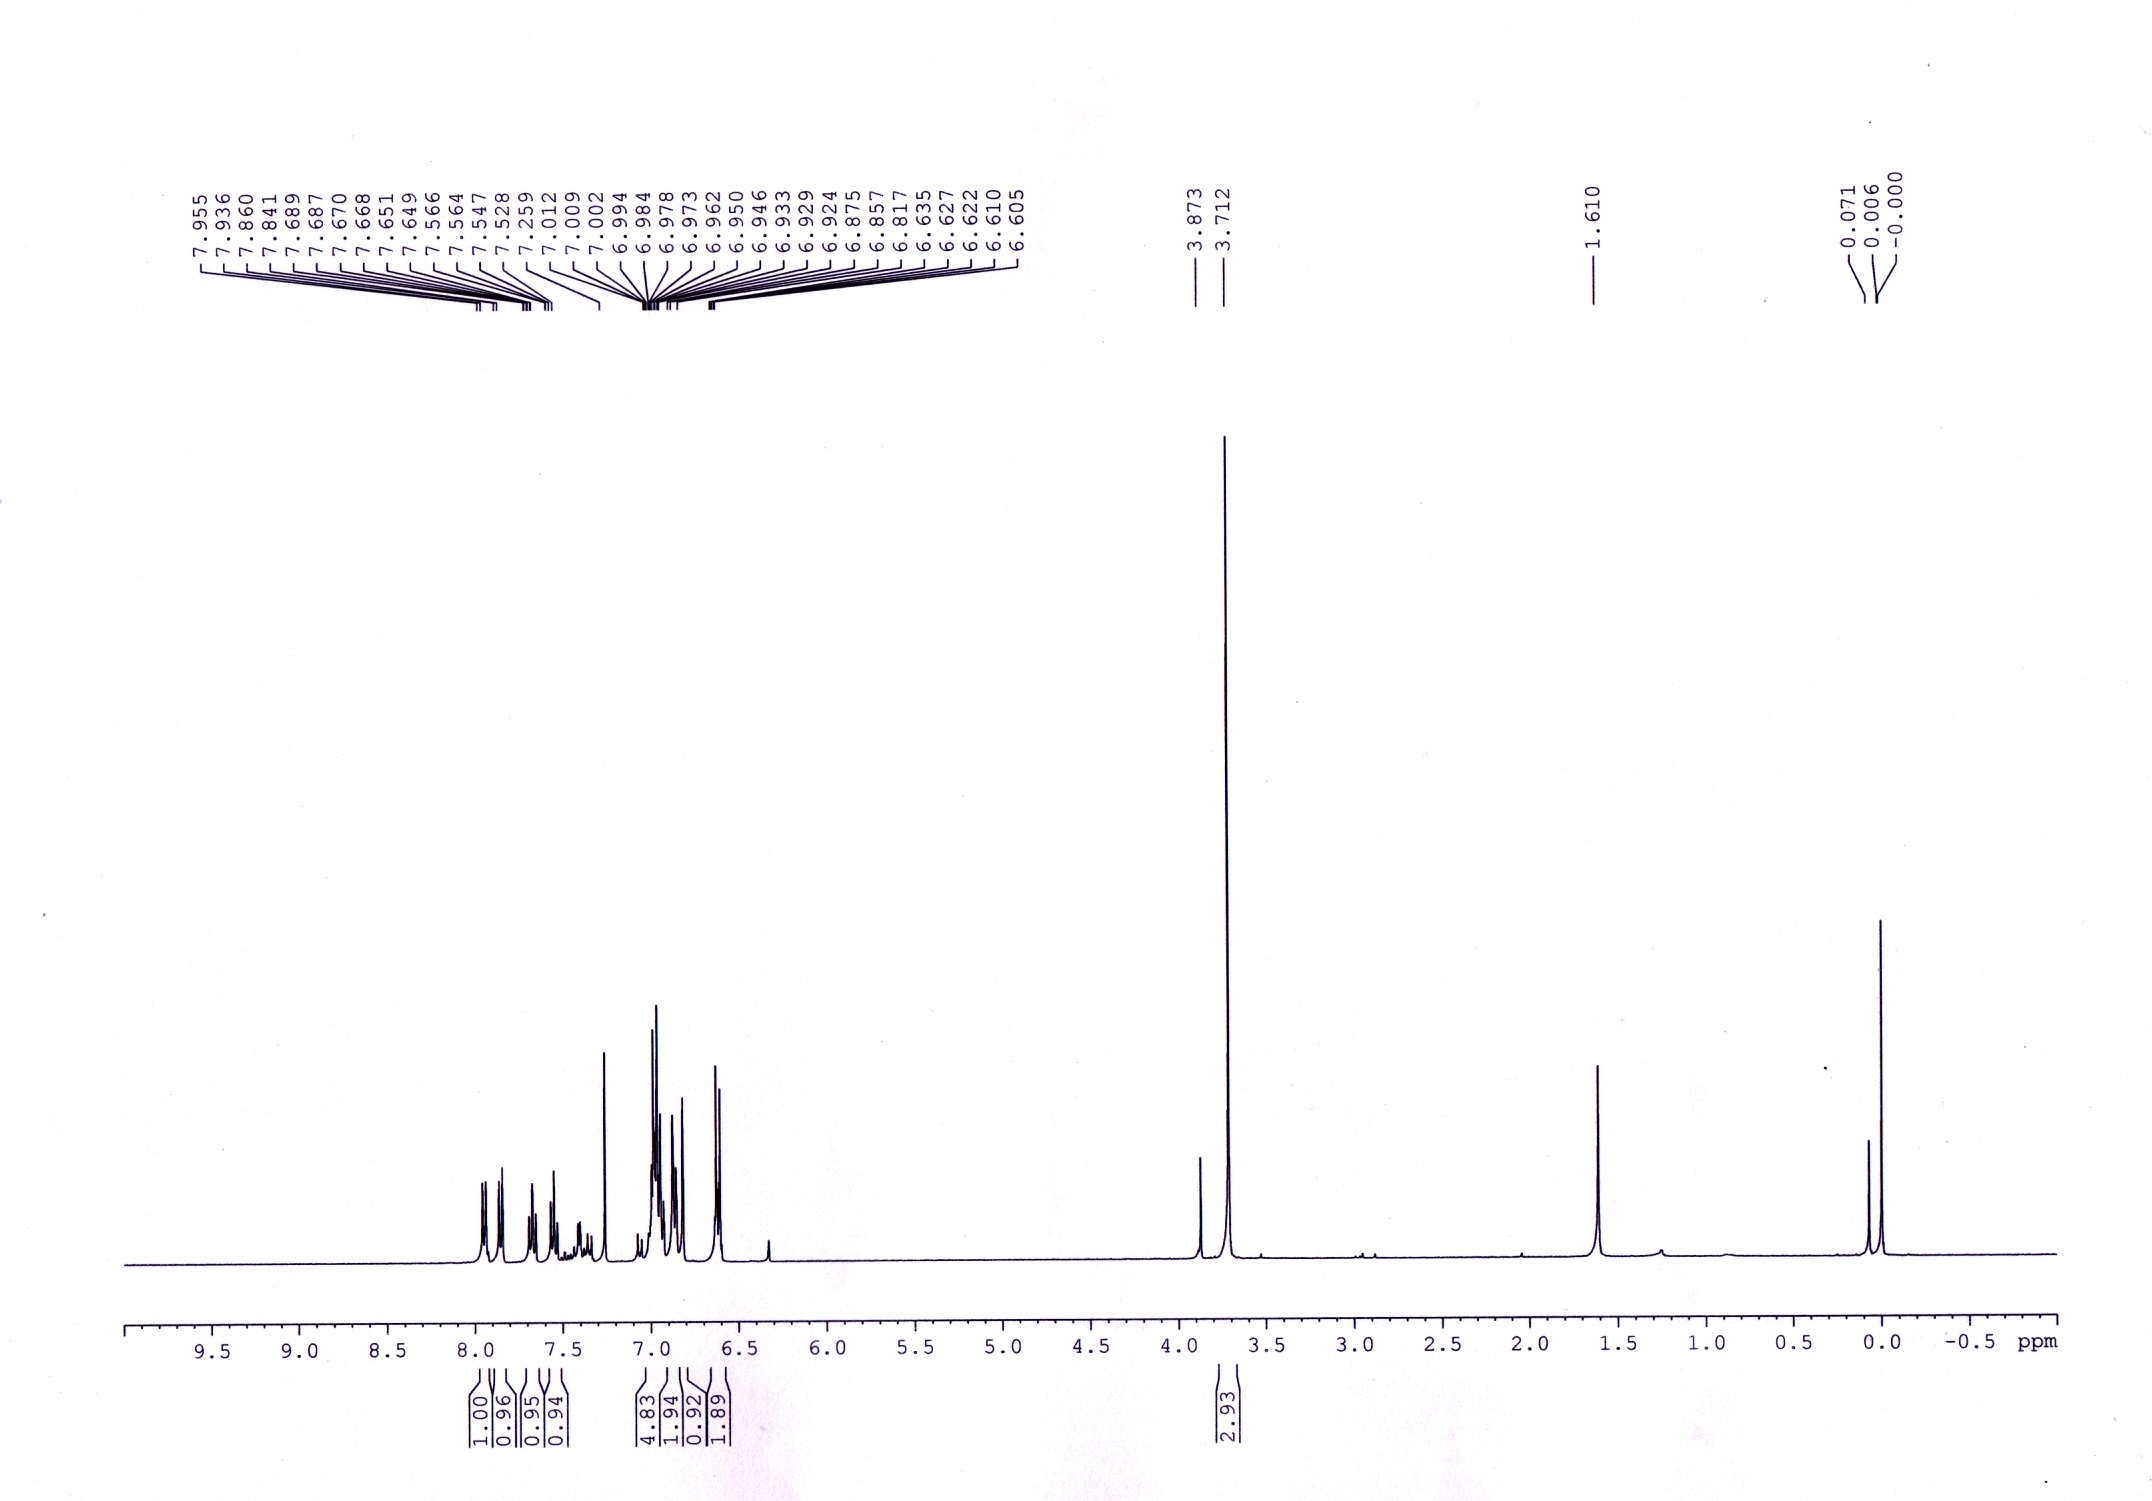


**Crystal data of 3a**

|  |
| --- |

| Bond precision: | C-C = 0.0031 A | Wavelength=0.71073 |
| --- | --- | --- |

| Cell: | a=8.1980(7) | b=9.3605(8) | c=19.8777(15) |
| --- | --- | --- | --- |
|  | alpha=90 | beta=90 | gamma=90 |
| Temperature: | 297 K |  |  |

|  | Calculated | Reported |
| --- | --- | --- |
| Volume | 1525.4(2) | 1525.4(2) |
| Space group | P 21 21 21 | P 21 21 21 |
| Hall group | P 2ac 2ab | P 2ac 2ab |
| Moiety formula | C21 H15 N O | ? |
| Sum formula | C21 H15 N O | C21 H15 N O |
| Mr | 297.34 | 297.00 |
| Dx,g cm-3 | 1.295 | 1.295 |
| Z | 4 | 4 |
| Mu (mm-1) | 0.079 | 0.079 |
| F000 | 624.0 | 682.0 |
| F000' | 624.25 |  |
| h,k,lmax | 10,11,24 | 10,11,24 |
| Nref | 2997[ 1743] | 2998 |
| Tmin,Tmax |  |  |
| Tmin' |  |  |

| Correction method= Not given |  |
| --- | --- |

| Data completeness= 1.72/1.00 | Theta(max)= 25.999 |
| --- | --- |

| R(reflections)= 0.0332( 2613) | wR2(reflections)= 0.0813( 2998) |
| --- | --- |

| S = 1.104 | Npar= 209 |
| --- | --- |
